# Supplementary material for: Optimization of Process Control Parameters for Fully Mechanized Mining Face Based on ANN and GA
Source: Comput Intell Neurosci. 2021 May 25;2021:5557831. doi: 10.1155/2021/5557831 (PMC8169252; doi:10.1155/2021/5557831)
Supplement: Supplementary Materials — The three supplementary data files provided in this paper are obtained by our laboratory. Data 1 is dataset 1 used in the paper; it contains all the historical production data of the key process control parameters of each production equipment collected by the sensors at the production site of the fully mechanized mining face. Data 2 is dataset 2 used in the paper which is filtered from dataset 1 to train and test the model in the paper. Data 3 is the operating trajectory data of the shearer. [file 5557831.f1.zip]

Archive with 3 entries (3 files):
- data1.csv
- data2.csv
- data3.csv
