# Supplementary material for: Optimization of Process Control Parameters for Fully Mechanized Mining Face Based on ANN and GA
Source: Comput Intell Neurosci. 2021 May 25;2021:5557831. doi: 10.1155/2021/5557831 (PMC8169252; doi:10.1155/2021/5557831)
Supplement: Supplementary Materials — The three supplementary data files provided in this paper are obtained by our laboratory. Data 1 is dataset 1 used in the paper; it contains all the historical production data of the key process control parameters of each production equipment collected by the sensors at the production site of the fully mechanized mining face. Data 2 is dataset 2 used in the paper which is filtered from dataset 1 to train and test the model in the paper. Data 3 is the operating trajectory data of the shearer. [file 5557831.f1.zip › data1.csv]

PSS	HSMS	CSSC	CSSL	EPOP1	EPOP2	SPOP1	SPOP2	OCPM
29.51351351	10.25135135	1099.84	1449.727273	55.2	56.76923077	296.2830189	302	292.0539243
16.25	5.15	1100.047619	1449.35	53.86111111	55.96666667	293.7818182	300.0740741	160.8035
17.33333333	5.566666667	1099.357143	1449.823529	55.33333333	56.96774194	298.8	303.0576923	171.5237333
16.86486486	5.386486486	1099.52381	1449.648649	54.14634146	55.85714286	287.0925926	293.25	166.8879568
24.96	8.5	1099.8	1448.871795	53.80487805	55.80769231	289.3703704	295.2962963	246.994176
12.64864865	3.764864865	1099.478261	1449.675676	55.25581395	56.82608696	292.3214286	299.3888889	125.1659676
39	13.9	1099.5	1449.307692	55.06666667	56.8	295.9636364	300.4814815	385.9284
58.5	21.4	1099.611111	1450.181818	54.52380952	56.28571429	278.0909091	284.462963	578.8926
78	28.9	1098.419355	1449.028571	53.07692308	54.71428571	284.8518519	291.037037	771.8568
58.5	21.4	1099.25	1448.714286	54.7	56.09090909	287.8461538	294.7254902	578.8926
7.8	1.9	1099.428571	1448.725	55.23684211	56.88888889	274.6	280.6981132	77.18568
52	18.9	1098.952381	1449.976744	55.26190476	56.89655172	290.9818182	297.462963	514.5712
36	12.74615385	1099.717949	1448.96	55.3255814	56.81481481	288.875	294.8392857	356.2416
52	18.9	1098.489362	1448.463415	54.58695652	56.53846154	289.6851852	294.4181818	514.5712
26	8.9	1099.404255	1449.675	54.77272727	55.90322581	285.6415094	291.6603774	257.2856
24.63157895	8.373684211	1099.341463	1449.6	54.26829268	56.32258065	282.9107143	288.7090909	243.7442526
3.627906977	0.295348837	1099.761905	1449.634146	55.28947368	56.75	296.3272727	302.0181818	35.90031628
11.41463415	3.290243902	1100.151515	1448.861111	55.09090909	56.96	279.9814815	286.7678571	112.9546537
13.86666667	4.233333333	1099.525	1448.725	55.35897436	56.75757576	287.3269231	295.8867925	137.2189867
10.75862069	3.037931034	1098.857143	1448.631579	54.79545455	56.45833333	294.3090909	298.2777778	106.4630069
12	3.515384615	1100	1448.347826	54.42857143	55.96551724	218.3518519	221.2037037	118.7472
7.090909091	1.627272727	1099.512195	1449	55.97560976	57.74074074	289.9230769	296.4259259	70.1688
13.76470588	4.194117647	1100.666667	1449.361111	55.21428571	57.125	287.3962264	292.1454545	136.2100235
13	3.9	1098.97561	1450.425	55.55813953	57.59259259	270.0188679	274.5	128.6428
52	18.9	1098.25	1447.815789	56.15909091	57.93103448	22.07142857	31.11111111	514.5712
9.957446809	2.729787234	1099.857143	1449.8	54.975	56.64516129	282.34	286.0925926	98.53491064
4	0.438461538	1098.857143	1452.15	56.26666667	57.62962963	281.4259259	284.9622642	39.5824
6.5	1.4	1099.317073	1448.171429	55.15555556	56.85294118	285.3846154	288.0377358	64.3214
31.2	10.9	1099.416667	1449.627907	55.62790698	57.34375	280.4814815	283.2777778	308.74272
20.52631579	6.794736842	1099.591837	1449.194444	56.02380952	57.85714286	295.2222222	298.537037	203.1202105
12.48	3.7	1100.636364	1448.289474	56.18367347	57.89473684	293.4	296.8	123.497088
14.71698113	4.560377358	1100.263158	1449.72093	55.86363636	57.71428571	292.8653846	297.5090909	145.6333585
15.6	4.9	1100.285714	1450.418605	55.95121951	57.76190476	299.5849057	304	154.37136
13.37142857	4.042857143	1099.535714	1450.714286	56.10869565	57.83333333	293	296.5	132.3183086
2.888888889	0.011111111	1099.5	1449.733333	55.86046512	57.84615385	292.6981132	295.0816327	28.58728889
14.51162791	4.481395349	1099.777778	1449.823529	56.32432432	57.92	293.5892857	297.75	143.6012651
6.5	1.4	1099.782609	1450.285714	55.18181818	56.59259259	296.9622642	301.22	64.3214
12.23529412	3.605882353	1099.074074	1449.513514	54.61904762	56.76923077	291.9622642	297.4339623	121.0755765
12.64864865	3.764864865	1099.290323	1448.413793	55.88888889	57.41935484	291.6415094	295.8	125.1659676
14.85714286	4.614285714	1099.193548	1449.647059	55.97142857	57.88461538	298.3076923	300.54	147.0203429
26	8.9	1099.613636	1448.611111	54.8372093	56.65625	300.5660377	304.5471698	257.2856
11.14285714	3.185714286	1100.527778	1448.648649	55.775	57.46153846	290.6792453	293.7142857	110.2652571
22.94117647	7.723529412	1100.424242	1448.977778	56.025	57.6	286.4716981	289.3962264	227.0167059
28.88888889	10.01111111	1099.645161	1452.358974	55.95744681	57.83783784	298.0566038	301.5636364	285.8728889
9.454545455	2.536363636	1098.428571	1449.555556	55.87755102	57.69230769	293.2037037	296.9245283	93.5584
12.73469388	3.797959184	1099.488889	1448.815789	55.94736842	57.74074074	296.3	301	126.0174367
6.5	1.4	1100.121212	1449.236842	55.73684211	57.35	295.0545455	299.0961538	64.3214
7.090909091	1.627272727	1098.868421	1451.15	55.64285714	57.17241379	285.4509804	289.5882353	70.1688
23.11111111	7.788888889	1099.621622	1449.785714	55.20833333	57.21212121	295.8727273	300.1730769	228.6983111
12.31578947	3.636842105	1099.324324	1449.611111	55.52631579	56.89473684	287.2777778	291.1568627	121.8721263
6.367346939	1.348979592	1099.289474	1448.945946	56.30232558	57.61538462	293.8727273	296.1025641	63.00871837
10.75862069	3.037931034	1100.210526	1448.785714	55.95348837	57.86206897	293.8	282.0666667	106.4630069
8.210526316	2.057894737	1099.809524	1449.229167	55.54166667	57.40740741	293.6727273	216.5333333	81.24808421
12	3.515384615	1098.945946	1450.086957	55.22222222	56.7826087	287.5185185	21.90909091	118.7472
7.090909091	1.627272727	1099.9	1449.688889	54.52	56.13333333	289.5294118	1.538461538	70.1688
22.28571429	7.471428571	1100.534884	1447.95	53.37777778	54.9375	289.4716981	1	220.5305143
39	13.9	1099.222222	1452.791667	55.53488372	57.20588235	295.8333333	3.428571429	385.9284
5.672727273	1.081818182	1099.5	1447.837209	55.48717949	57.09375	287.3461538	61.55555556	56.13504
15.6	4.9	1100.627907	1448.243902	56.04878049	57.87096774	294.1886792	298.9814815	154.37136
6.5	1.4	1099.275862	1448.625	56.43902439	58.11538462	296.7307692	301.78	64.3214
22.28571429	7.471428571	1100	1450.333333	56.39534884	58.07142857	296.6037736	301.1372549	220.5305143
11.14285714	3.185714286	1099.3	1447.705882	54.97619048	56.75862069	293.9622642	299.3018868	110.2652571
5.777777778	1.122222222	1099.586207	1449.5	55.85	57.85185185	292.7407407	297.6603774	57.17457778
9.551020408	2.573469388	1099.84	1448.756098	56.19512195	57.70588235	288.4642857	292.8703704	94.51307755
12.23529412	3.605882353	1099.5	1450.159091	55.54761905	57.46666667	284.0588235	288.7454545	121.0755765
10.06451613	2.770967742	1099.5	1449.055556	54.82051282	56.58064516	286.5892857	291.3035714	99.59442581
7.609756098	1.826829268	1099.517241	1449.473684	56.58536585	58.0952381	290.4181818	294.2962963	75.30310244
7.255813953	1.690697674	1099.5	1449.6	55.75555556	57.56666667	288.5090909	292.24	71.80063256
16.42105263	5.215789474	1099.4	1449.535714	54.82608696	56.29032258	282.4363636	287.0181818	162.4961684
15	4.669230769	1099.310345	1449.032258	55.55263158	57.28571429	274.4230769	280.2037037	148.434
18.35294118	5.958823529	1099.860465	1448.756098	53.02325581	55.06060606	284.3207547	289.9807692	181.6133647
42.54545455	15.26363636	1099.769231	1448.914894	54.93333333	56.53125	278.6545455	282.9818182	421.0128
5.379310345	0.968965517	1099.023256	1449.422222	53.11904762	55	277.5357143	282.5185185	53.23150345
20	6.592307692	1100.117647	1450.108696	53.90909091	55.46153846	287.5090909	291.9444444	197.912
52	18.9	1098.071429	1449.2	56.05128205	57.96666667	289.0612245	294.5660377	514.5712
34.66666667	12.23333333	1098.95122	1447.6	55.93023256	57.63636364	280.3269231	285.5185185	343.0474667
39	13.9	1100.487179	1448.863636	55.16666667	56.8	285.4716981	290.1851852	385.9284
28.36363636	9.809090909	1099.909091	1450.659091	55.30952381	56.64516129	287.6545455	292.0545455	280.6752
11.77358491	3.428301887	1099.953488	1448.105263	56.11363636	57.83870968	287.8461538	292.8076923	116.5066868
9.176470588	2.429411765	1100.026316	1448.690476	55.2972973	57.17857143	287.1666667	292.3207547	90.80668235
8.210526316	2.057894737	1100.171429	1450.658537	56.19512195	57.96153846	294.7037037	299.8333333	81.24808421
10.94736842	3.110526316	1099.428571	1449.725	55.44444444	57.79166667	283	288.9807692	108.3307789
52	18.9	1098.622222	1449.565217	56.30434783	57.91666667	291.4807692	296.3214286	514.5712
16.13793103	5.106896552	1100.297872	1448.930233	56	57.37931034	296.8301887	301.1818182	159.6945103
11.14285714	3.185714286	1100.358974	1448.744186	56.24324324	58.1	296.78	301.8235294	110.2652571
10.4	2.9	1099.630435	1449.044444	55.34146341	57.03030303	288.8679245	293.0576923	102.91424
16.42105263	5.215789474	1100.475	1449.066667	56.23076923	57.86486486	282.0178571	286.0188679	162.4961684
7.609756098	1.826829268	1099.717949	1449.113636	56.07142857	57.96	283.3018868	288.3018868	75.30310244
6.24	1.3	1098.8	1450.487179	55.39130435	57.03030303	279.7924528	284.2181818	61.748544
9.957446809	2.729787234	1099.65625	1450.952381	54.75555556	56.65517241	284.6037736	290.0384615	98.53491064
4.588235294	0.664705882	1099.4	1448.292683	55.80952381	57.72727273	285.3921569	290.8431373	45.40334118
312	118.9	1099.170732	1448.769231	55.575	57.23809524	293.1851852	298.1818182	3087.4272
78	28.9	1099.808511	1449.666667	54.25	56.08333333	296.2884615	300.3703704	771.8568
17.33333333	5.566666667	1100.051282	1449.2	54.5952381	56.40740741	285.3396226	291.6545455	171.5237333
11.41463415	3.290243902	1099.489362	1449.282609	53.95744681	56.13793103	285.4	290.9636364	112.9546537
9.551020408	2.573469388	1099.62	1449.275	55.76190476	57.22222222	282.18	286.76	94.51307755
4.727272727	0.718181818	1100.125	1450.676471	55.48717949	57.53846154	284.9814815	290.7735849	46.7792
19.5	6.4	1099.74359	1449.097561	54.71052632	56.47058824	284.6	289.1923077	192.9642
13.27659574	4.006382979	1099.916667	1449.727273	55.65217391	57.17857143	285.9622642	290.3090909	131.3798809
6.367346939	1.348979592	1099.485714	1450	55.46341463	57.33333333	283.9636364	288.98	63.00871837
13.76470588	4.194117647	1099.896552	1448.451613	55.57142857	57.375	293.8461538	298.8846154	136.2100235
13	3.9	1099.5	1449.512821	55.52380952	57.33333333	292.9811321	296.7735849	128.6428
8.666666667	2.233333333	1099.043478	1449.857143	55.59090909	57.33333333	293.5576923	297.2653061	85.76186667
4.216216216	0.521621622	1099.891304	1448.891892	55.38636364	57.40740741	290.2222222	295.509434	41.72198919
7.428571429	1.757142857	1099.461538	1449.945946	55.5	57	283.0566038	287.3333333	73.51017143
93.6	34.9	1100.526316	1449.119048	55.18604651	56.75862069	286.1454545	290.7692308	926.22816
10.88372093	3.086046512	1099.771429	1451.475	54.41860465	56.17948718	288.5384615	292.3148148	107.7009488
12	3.515384615	1100.060606	1448.409091	55.08333333	56.86206897	287.7037037	292.5818182	118.7472
12	3.515384615	1098.714286	1450.977273	54.92307692	56.62068966	279.1607143	283.7962963	118.7472
13.76470588	4.194117647	1098.810811	1448.473684	53.3902439	55.125	280.6909091	285.7857143	136.2100235
6.5	1.4	1100.1	1449.688889	53.18421053	55.25714286	279.1509434	284.8113208	64.3214
14.625	4.525	1099.333333	1451	54.66666667	56.03333333	283.8333333	288.7924528	144.72315
10.4	2.9	1100.142857	1448.666667	55.44186047	56.83870968	293	297.2075472	102.91424
17.33333333	5.566666667	1100.052632	1449	53.76923077	55.73529412	279.6491228	284.2321429	171.5237333
8.210526316	2.057894737	1100	1449.244444	53.79545455	55.625	279.3584906	284.1818182	81.24808421
156	58.9	1100.972973	1450.35	54.48837209	55.92857143	287.24	290.9411765	1543.7136
9	2.361538462	1100	1451.2	54.69230769	56.25925926	281.4528302	286.6037736	89.0604
21.27272727	7.081818182	1098.973684	1450.25	54.75609756	56.43333333	279.7169811	284.7142857	210.5064
11.14285714	3.185714286	1100.151515	1450.439024	53.73809524	55.90625	283.9636364	287	110.2652571
8.432432432	2.143243243	1099.027778	1450.568182	54.6744186	56.63333333	285.7254902	289.6981132	83.44397838
15.2195122	4.753658537	1100.085714	1449.292683	52.71111111	54.4516129	290.7090909	294.5090909	150.6062049
34.66666667	12.23333333	1099.742857	1449.512195	53.42857143	55.3125	285.4727273	288.5740741	343.0474667
10.06451613	2.770967742	1100.025	1449.675	53.775	55.78571429	284.1964286	289.2830189	99.59442581
312	118.9	1100.170732	1449.333333	54.88636364	56.84	303.4716981	307.5490196	3087.4272
28.36363636	9.809090909	1099	1449.630435	55.3255814	56.81818182	294.5090909	299.5090909	280.6752
5.571428571	1.042857143	1099.740741	1448.909091	53.35714286	55.32142857	288.4464286	293.8181818	55.13262857
9.551020408	2.573469388	1099.806452	1448.930233	54.075	55.5483871	289.2	293.6909091	94.51307755
52	18.9	1099.666667	1451.268293	53.54761905	55.26315789	290.1111111	295.7884615	514.5712
6.367346939	1.348979592	1099.677419	1450.128205	54.6875	56.37037037	293.754717	298.7818182	63.00871837
15.09677419	4.706451613	1099.5	1450.029412	53.73170732	55.375	291.4038462	296.0740741	149.3916387
6.782608696	1.508695652	1099.478261	1449.30303	53.23809524	55.125	287.0178571	290.1132075	67.11798261
3.466666667	0.233333333	1099.576923	1449.742857	54	55.82352941	286.6603774	290.9107143	34.30474667
10.63636364	2.990909091	1099.380952	1450.5	54.34782609	56.22580645	291.2830189	296.7777778	105.2532
22.28571429	7.471428571	1099.423077	1448.571429	51.9787234	53.38235294	281.9803922	288	220.5305143
39	13.9	1099.090909	1449.424242	54.56818182	56.03571429	292.8703704	297.0185185	385.9284
78	28.9	1099.314286	1447.948718	54.625	56.21428571	283.0555556	288.4545455	771.8568
2.888888889	0.011111111	1099.105263	1449.348837	53.61538462	55.54054054	282.4074074	286.254902	28.58728889
44.57142857	16.04285714	1098.875	1448.906977	53.725	55.37142857	290.7321429	295.4909091	441.0610286
7.090909091	1.627272727	1100.15	1449.026316	54.54166667	56.5	289.9622642	291.9454545	70.1688
24.63157895	8.373684211	1099.484848	1450.685714	55.19512195	56.89655172	300.2037037	305.3518519	243.7442526
78	28.9	1100.1875	1448.177778	53.86956522	55.5	293.9272727	297	771.8568
14.18181818	4.354545455	1099.804878	1450.391304	54.1	55.59375	296.8181818	299.5454545	140.3376
9.75	2.65	1099.627907	1450.829268	54.13513514	56	294.6909091	296.5090909	96.4821
12.48	3.7	1099.536585	1448.15	54.09090909	55.75757576	294.1698113	297.3571429	123.497088
9.957446809	2.729787234	1099.195652	1449.857143	53.7804878	55.84615385	298.2264151	302	98.53491064
12	3.515384615	1099.95122	1449.821429	54.65853659	56.43478261	297.7222222	300.8888889	118.7472
9.75	2.65	1100.175	1450.722222	54.675	56	295.7222222	297.6603774	96.4821
12.48	3.7	1098.380952	1449.447368	54.91176471	56.59259259	295.9444444	299.1320755	123.497088
3.714285714	0.328571429	1099.775	1449.342857	53.09302326	55	287.7857143	290.6964286	36.75508571
15.09677419	4.706451613	1100.3	1449.244444	54.75609756	56.34615385	293.4	298.7090909	149.3916387
28.36363636	9.809090909	1099.971429	1449.8	54.675	56.25	288.6981132	294.3518519	280.6752
8.666666667	2.233333333	1099.085106	1448.371429	54.32432432	56.06896552	291.6	296.1090909	85.76186667
11.14285714	3.185714286	1100.104167	1449.682927	54.70454545	56.35714286	290.9615385	297.9259259	110.2652571
312	118.9	1099.307692	1449.078947	53.85	55.61111111	294.2909091	298.2777778	3087.4272
15.2195122	4.753658537	1100.365854	1449.235294	53.82051282	55.64	291.8363636	296.9285714	150.6062049
16	5.053846154	1100.297297	1449.027027	53.5	55.375	294.537037	299.6666667	158.3296
17.82857143	5.757142857	1099.444444	1450.5625	53.525	55.57142857	294.1851852	299.037037	176.4244114
18.90909091	6.172727273	1099.682927	1449.176471	53.82222222	55.56666667	295.1132075	299.9811321	187.1168
4.333333333	0.566666667	1099.851852	1448.461538	53.75	55.53333333	293.4727273	296.9615385	42.88093333
24	8.130769231	1099.310345	1450.068966	53.63043478	55.75	292.7090909	298.1785714	237.4944
3.804878049	0.363414634	1099.344828	1449.5	53.58974359	55.52	292.5555556	297.4363636	37.65155122
9.551020408	2.573469388	1099	1449.607143	53.64285714	55.69230769	293.5964912	298.7321429	94.51307755
10.75862069	3.037931034	1099.348837	1448.9	53.76315789	55.76	292.8888889	297.9814815	106.4630069
6.638297872	1.453191489	1100.027027	1448.658537	53.63265306	55.5	289.7115385	294.6792453	65.68994043
9.75	2.65	1100.1	1449.536585	53.20454545	55.39130435	290.7368421	296.9444444	96.4821
4.216216216	0.521621622	1099.448276	1449.953488	52.85714286	54.44444444	295.2407407	300.6	41.72198919
34.66666667	12.23333333	1099.390244	1449.470588	53.73170732	55.66666667	293.1666667	297.9811321	343.0474667
156	58.9	1098.727273	1449.756757	53.12820513	54.42857143	291.462963	297.9090909	1543.7136
13.37142857	4.042857143	1099.52381	1449.74359	53.70731707	55.68421053	294.0363636	299.2181818	132.3183086
14.18181818	4.354545455	1100.542857	1447.307692	53.74358974	55.57692308	297.2962963	302.755102	140.3376
16.25	5.15	1099.833333	1448.790698	53.19444444	54.71428571	293.9411765	298.2692308	160.8035
7.428571429	1.757142857	1099.027778	1450.452381	52.90697674	54.58064516	291.1454545	296.375	73.51017143
11.55555556	3.344444444	1099.133333	1449.972973	53.3902439	55.04347826	290.462963	294.68	114.3491556
13	3.9	1099.409091	1448.666667	52.62162162	54.5	288.9824561	294.2222222	128.6428
23.4	7.9	134.5454545	1030.5	52.80434783	54.46875	287.7037037	293.4528302	231.55704
24	8.130769231	913.7291667	1447.325	52.625	54.1	291.4181818	296.537037	237.4944
12	3.515384615	1099.078947	1450.435897	52.11904762	53.85185185	290.4363636	296.3928571	118.7472
20.8	6.9	1099.605263	1447.6875	53.04651163	54.725	288.1666667	294.3454545	205.82848
11.55555556	3.344444444	1099.75	1450.853659	51.35	52.67567568	287.1296296	293.5	114.3491556
39	13.9	1099.962963	1451.088889	51.48888889	53.42424242	296.4814815	301.4259259	385.9284
16.25	5.15	1099.5	1449.433333	52.29787234	54.08695652	292.7142857	297.6481481	160.8035
12.73469388	3.797959184	1099.464286	1449.916667	53.25641026	55.29166667	301.0784314	305.64	126.0174367
15	4.669230769	1099.703704	1448.571429	53.52272727	55.16129032	297.9622642	302.5272727	148.434
11.14285714	3.185714286	1099.636364	1451.108108	53.26190476	55.18181818	296.8363636	302.3269231	110.2652571
12.23529412	3.605882353	1099.590909	1449.903226	53.21428571	55.13043478	298.7254902	304.8367347	121.0755765
17.33333333	5.566666667	1099.35	1449.961538	53.43902439	55.2	295.25	300.2075472	171.5237333
22.28571429	7.471428571	1099.55	1449.074074	52.74418605	54.70833333	295.0555556	299.2181818	220.5305143
13.86666667	4.233333333	1099.448276	1448.4375	52.91428571	55.18181818	294.4807692	298.5192308	137.2189867
11.34545455	3.263636364	1100	1450.538462	53.31578947	55.03448276	297.4423077	301.962963	112.27008
20.34782609	6.726086957	1099.434783	1449.483871	51.63043478	53.62068966	293.5925926	299.125	201.3539478
6.638297872	1.453191489	1099.538462	1449	50.74358974	52.51515152	292.3571429	295.4363636	65.68994043
34.66666667	12.23333333	1099.384615	1449.611111	49.69230769	51.74193548	294.7857143	298.2545455	343.0474667
20.8	6.9	1098.710526	1449.085714	50.17142857	52.14814815	292.3518519	298.4313725	205.82848
11.77358491	3.428301887	1099.414634	1448.926829	49.92682927	51.86206897	296.8039216	300.8653846	116.5066868
13	3.9	1099.548387	1449.622222	50.41860465	52.61111111	292.4074074	298.3090909	128.6428
3.545454545	0.263636364	1099.538462	1449.131579	50.95238095	52.875	292.0357143	296.1509434	35.0844
7.090909091	1.627272727	1099.813953	1449.325	50.40425532	51.84848485	294.6226415	299.0740741	70.1688
9.75	2.65	1099.128205	1449.85	50.42222222	52.51612903	291.6666667	297.7222222	96.4821
9.551020408	2.573469388	1099.741935	1449.454545	47.36363636	49.25	291.1272727	296.7454545	94.51307755
21.51724138	7.175862069	1099.46875	1449.857143	48.11627907	49.96875	289.3636364	296.3035714	212.9260138
7.8	1.9	1099.540541	1449.609756	49.92857143	51.625	286.2181818	294.0181818	77.18568
18.72	6.1	1099.882353	1449.5	48.53488372	50.24242424	293.8148148	299.4444444	185.245632
15.91836735	5.02244898	1099.5	1448.833333	52.24444444	53.68	291.9807692	297.9642857	157.5217959
6.5	1.4	1099.651163	1449.857143	52.675	54.48148148	290.4259259	297.0892857	64.3214
8.357142857	2.114285714	1099.644444	1448.848485	52.13043478	54.03703704	285.1666667	291.7857143	82.69894286
156	58.9	1099.685714	1449.25	51.34693878	53.2	292.6415094	299.1296296	1543.7136
312	118.9	1099.47619	1449.181818	54.35714286	56.26086957	302.6862745	307.5740741	3087.4272
4.727272727	0.718181818	1099.133333	1448.5	54.48717949	55.68965517	295.4117647	300.1923077	46.7792
17.33333333	5.566666667	1099.727273	1448.837209	53.68181818	54.85714286	292.4464286	297.6111111	171.5237333
7.428571429	1.757142857	1100.030303	1449.052632	53.525	55.05555556	296.8518519	302.1509434	73.51017143
13	3.9	1099.815789	1449.214286	54.73809524	56.46428571	297.5185185	301.1923077	128.6428
2.644067797	-0.083050847	1099.84375	1450.1	54.78947368	56.23076923	294.6909091	299.4	26.16463729
4.216216216	0.521621622	1099.709677	1449.515152	54.68181818	56.25806452	300.3090909	304.375	41.72198919
19.5	6.4	1099.172414	1450.375	54.64444444	56.5	294.2592593	298.8545455	192.9642
19.5	6.4	1099.925926	1448.657895	54.02380952	55.7037037	290.7307692	296.7037037	192.9642
11.14285714	3.185714286	1100.081081	1449.452381	54.6	56.12	293.5192308	299.1111111	110.2652571
17.33333333	5.566666667	1099.702703	1449.970588	54.04545455	55.93548387	295.5090909	301.6851852	171.5237333
6.367346939	1.348979592	1099.25	1449.705882	54.3255814	56.04347826	291.8	297.3018868	63.00871837
156	58.9	1099.40625	1449.34375	53.29268293	54.75	292.7115385	297.5740741	1543.7136
6.782608696	1.508695652	1099.363636	1448.512821	54.35555556	56.16	292.6415094	296.9622642	67.11798261
39	13.9	1099.976744	1448.878049	53.70454545	55.60714286	292.2307692	298.6226415	385.9284
22.28571429	7.471428571	1100.212121	1448.432432	54.66666667	56.11538462	293.2545455	297.7407407	220.5305143
11.34545455	3.263636364	1099.842105	1450.319149	52.07142857	53.95652174	289.6296296	294.3859649	112.27008
9.75	2.65	1099.586207	1450.729167	54.85714286	56.18518519	291.4038462	295.9811321	96.4821
7.8	1.9	1099.435897	1448.769231	54.45454545	56.28571429	299.7037037	304.4642857	77.18568
4	0.438461538	1099.171429	1450.692308	54.69767442	56.30555556	297.1730769	302.245283	39.5824
15.91836735	5.02244898	1099.761905	1448.65	54.60465116	56.28571429	297.5272727	301.8113208	157.5217959
14.85714286	4.614285714	1099.966667	1450.288889	54.26190476	55.86666667	296.1176471	300.9074074	147.0203429
33.42857143	11.75714286	1099.631579	1448.619048	53.28571429	55.24137931	299.0377358	304.1698113	330.7957714
18.35294118	5.958823529	1099.4	1449.878049	51.14634146	52.89655172	298.3272727	302.2641509	181.6133647
31.2	10.9	1099.068182	1449.625	49.875	52.18518519	293.6603774	298.6363636	308.74272
16.95652174	5.42173913	1100.195122	1448.813953	51.58139535	53.08333333	299.9818182	305.5384615	167.7949565
156	58.9	1100.483871	1448.390244	54.87234043	56.15151515	295.3333333	299.4528302	1543.7136
8.210526316	2.057894737	1099.648649	1449	53.56410256	55.25	296.4107143	302.5535714	81.24808421
6.117647059	1.252941176	1100.139535	1449.173913	53.74418605	55.42857143	295.9636364	300.2321429	60.53778824
15.09677419	4.706451613	1099.914286	1448.704545	53.8	55.37931034	292.2941176	296.6226415	149.3916387
10.4	2.9	1100.227273	1449.255319	53.69387755	55.43333333	296.5471698	299.9454545	102.91424
9.75	2.65	1101.371429	1449.166667	50.60465116	52.27027027	294.7454545	300.8235294	96.4821
31.2	10.9	1099.954545	1453.419355	50.02631579	51.90322581	295.7090909	300.9433962	308.74272
5.886792453	1.164150943	1099.5	1449.7	51.24444444	52.8	292.4074074	298.3571429	58.2533434
156	58.9	400.0232558	1449.666667	54.41463415	55.82608696	296.3	300.4814815	1543.7136
12.23529412	3.605882353	399.7272727	1449.473684	53.42105263	54.96774194	289.2115385	294.2037037	121.0755765
8.830188679	2.296226415	399.8	1449.833333	50.36956522	52.55263158	284.037037	288.5882353	87.38001509
52	18.9	399.9268293	1449.59375	52.23076923	53.11764706	292.3392857	297.0181818	514.5712
8.210526316	2.057894737	399.974359	1449.78125	53.72093023	55.72222222	295.8823529	301.509434	81.24808421
13	3.9	399.7727273	1449.774194	52.86956522	54.88235294	291.0727273	295.2545455	128.6428
6.5	1.4	399.775	1449.59375	53.425	55.16666667	289.6346154	294.9090909	64.3214
9.551020408	2.573469388	399.4473684	1449.487179	54.09090909	55.8125	293.3846154	298.5454545	94.51307755
19.5	6.4	399.5116279	1449.432432	53.88095238	55.46341463	290.2363636	294.8490566	192.9642
10.75862069	3.037931034	399.5365854	1449.225806	53.13636364	55.02857143	291.6226415	296.0943396	106.4630069
12.48	3.7	399.5714286	1450.09375	53.38095238	55.14634146	291.98	296.9019608	123.497088
20.34782609	6.726086957	399.6086957	1449.27027	51.54545455	53.375	293.7884615	297.8545455	201.3539478
17.33333333	5.566666667	771.3469388	1447.421053	50.26190476	51.96875	293.7090909	299.4727273	171.5237333
52	18.9	1099.595238	1449.465116	52.06	53.74074074	292.462963	297.9811321	514.5712
4	0.438461538	1100	1450.093023	52.90697674	54.75862069	291.9818182	297.1320755	39.5824
13	3.9	1098.840909	1448.378378	53.55555556	55.02777778	292.3636364	297.1428571	128.6428
52	18.9	1100.179487	1449.340426	54.06666667	55.91176471	293.3396226	297.6153846	514.5712
44.57142857	16.04285714	1099.243902	1450	53.10638298	54.875	291.3018868	296.7647059	441.0610286
34.66666667	12.23333333	1099.585366	1450.119048	53.4	55.51612903	290.7777778	295.7777778	343.0474667
9.176470588	2.429411765	1099.538462	1448.871795	52.97777778	54.5862069	287.7407407	293.8181818	90.80668235
17.33333333	5.566666667	1099.525	1448.644444	53.18604651	55.06060606	290.9636364	296.462963	171.5237333
11.55555556	3.344444444	1100	1449.488372	54.09302326	55.84848485	295.9454545	300.037037	114.3491556
9.176470588	2.429411765	1098.666667	1449.738095	59.48780488	61.59259259	295.4727273	300.6	90.80668235
12	3.515384615	1100.114286	1447.090909	59.58139535	60.79310345	291.8679245	298.2115385	118.7472
17.33333333	5.566666667	1099.833333	1450.55814	58.23076923	60.03030303	291.7142857	296.6363636	171.5237333
19.5	6.4	1099.27027	1448.823529	60.31111111	61.88461538	290.9259259	296.8148148	192.9642
10.4	2.9	1099.967742	1449.902439	59.71052632	61.32258065	288.0727273	293.8	102.91424
18.90909091	6.172727273	1100.083333	1450.216216	60.69230769	62.58333333	292.6730769	298.0754717	187.1168
8	1.976923077	1099.413793	1450.485714	60.4	61.69230769	291.2407407	296.7307692	79.1648
9.75	2.65	1099	1449.966667	59.02564103	60.86206897	293.3392857	297.5438596	96.4821
10.63636364	2.990909091	1099.272727	1448.357143	60.58536585	62.54545455	292.3962264	296.8301887	105.2532
6.117647059	1.252941176	1099.794118	1449.658537	66.41666667	68.48148148	294.64	299.1132075	60.53778824
5.777777778	1.122222222	1099.827586	1448.736842	66.45	66.92	291.4909091	296.7777778	57.17457778
6.933333333	1.566666667	1099.868421	1449.868421	67.34285714	68.96	288.75	293.1607143	68.60949333
22.28571429	7.471428571	1100.115385	1450.162162	67.15789474	68.61538462	289.2363636	293.5892857	220.5305143
8.666666667	2.233333333	1099.575758	1450.75	67.34146341	68.82857143	293.1764706	296.6666667	85.76186667
52	18.9	1099.413793	1449.068182	67.53846154	68.82758621	294.5849057	300.6491228	514.5712
11.14285714	3.185714286	1099.076923	1448.545455	65.86956522	67.41666667	291.9814815	297.5	110.2652571
31.2	10.9	1099.404255	1449	67	68.96666667	288.4313725	295.0925926	308.74272
18.72	6.1	1098.97561	1449.416667	67.35135135	68.875	289.8703704	294.8846154	185.245632
12	3.515384615	1100.375	1449.257143	66.91489362	68.54545455	293.9444444	299.3333333	118.7472
6.782608696	1.508695652	1100.1875	1449.738095	67.3255814	68.68181818	291.9038462	296.8461538	67.11798261
7.090909091	1.627272727	1099.146341	1452	67.06818182	69	292.78	299.4230769	70.1688
12.48	3.7	1099.527778	1449.068182	67	68.15625	296.4259259	302.7735849	123.497088
15.6	4.9	1099.545455	1449.022727	66.12820513	67.1875	292.6727273	298.4181818	154.37136
9.176470588	2.429411765	1100.233333	1450.055556	60.33333333	62.2962963	293.2545455	298.5	90.80668235
17.33333333	5.566666667	1099.517241	1449.325581	61.02702703	62.24137931	290.9444444	295.9818182	171.5237333
7.8	1.9	1099.45	1449.583333	61.075	62.47058824	289.6545455	294.5185185	77.18568
9.75	2.65	1099.181818	1448.864865	60.61363636	62.48275862	297.9444444	302.5740741	96.4821
8.666666667	2.233333333	1099.219512	1449.6	60.34285714	62.41666667	292.9814815	297.6964286	85.76186667
15.6	4.9	1100	1450.355556	59.6744186	61.44444444	286.4181818	291.9272727	154.37136
15.6	4.9	1100.121951	1448.45	59.43589744	61.25	293.3888889	298.8035714	154.37136
10.4	2.9	1099.378378	1451.410256	60.4047619	62.17857143	289.7358491	294.7843137	102.91424
26	8.9	1098.933333	1448.097561	60.16	62.09090909	293.0555556	297.5454545	257.2856
9.957446809	2.729787234	1099.5	1447.511628	59.70212766	61.52173913	289.5555556	293.7321429	98.53491064
8	1.976923077	1099.731707	1449.931818	60.54545455	61.90322581	291.56	296.754717	79.1648
6.5	1.4	1099.725	1450.325581	60.5952381	62	288.1296296	294.3518519	64.3214
9	2.361538462	1100.044444	1449.432432	59.9787234	61.47826087	287.9818182	294.0545455	89.0604
10.75862069	3.037931034	1100.622222	1448.97561	60.0754717	61.26923077	288.1346154	294.0188679	106.4630069
8	1.976923077	1003.25	1449.866667	59.76744186	61.57575758	289.6037736	295.2	79.1648
5.886792453	1.164150943	1099.418605	1447.926829	59.23255814	60.57142857	290.2105263	295.7454545	58.2533434
13	3.9	906.1666667	1456.645161	58.425	60.44444444	290.5925926	294.4074074	128.6428
12	3.515384615	12.33333333	1449.526316	60.54545455	62.43478261	296.5	301.6181818	118.7472
9.75	2.65	1100.148148	1448.694444	61.09090909	62.88461538	295.8867925	300.9454545	96.4821
6.117647059	1.252941176	1099.444444	1451.5	59.54545455	61.29032258	295.6181818	299.9259259	60.53778824
8.914285714	2.328571429	1099.48	1449.128205	58.48837209	60.125	294.1111111	299.4230769	88.21220571
39	13.9	1099.833333	1449.05	59.86046512	61.33333333	289.7884615	296.2181818	385.9284
8.432432432	2.143243243	1099.518519	1450.102564	59.72093023	61.31428571	288.9038462	294.0555556	83.44397838
14.18181818	4.354545455	1099.866667	1451	59.82926829	61.375	290.5925926	297.25	140.3376
6.24	1.3	1099.473684	1449.435897	60.08510638	61.75	293.0754717	297.2037037	61.748544
8.914285714	2.328571429	1099.576923	1449.90625	60.82222222	62.80769231	294	298.4821429	88.21220571
26	8.9	1099.473684	1449.484848	60.70833333	62.21212121	292.2156863	297.0961538	257.2856
16.42105263	5.215789474	1099.6875	1448.733333	60.45833333	62.28	290.0181818	295.3454545	162.4961684
3.466666667	0.233333333	1099.230769	1448.820513	59.88372093	61.82608696	292.4074074	298.6792453	34.30474667
10.17391304	2.813043478	1100.111111	1449.358974	60.63636364	62.63636364	296.4814815	301.6226415	100.6769739
23.63636364	7.990909091	1099.162162	1450.083333	60.63157895	62.38095238	296.3888889	302.245283	233.896
13	3.9	1099.972973	1448.775	60	61.88888889	297.4909091	302.7777778	128.6428
19.5	6.4	1099.69697	1449.894737	61.1025641	62.62068966	299.6	304.3962264	192.9642
18.57142857	6.042857143	1099.228571	1449.657143	60.46153846	61.96774194	293.8392857	299.0178571	183.7754286
24	8.130769231	1099.673913	1449.870968	60.87179487	62.38461538	291.754717	298	237.4944
52	18.9	1099.756757	1450.029412	60.72340426	62.45833333	294.0363636	299.3454545	514.5712
10.4	2.9	1099.419355	1448.805556	60.06060606	62	293.6153846	299.7307692	102.91424
12	3.515384615	1099.675676	1448.923077	60.25641026	61.62068966	295.1568627	301.4444444	118.7472
10.4	2.9	1099.84375	1449.5	59	61.03571429	288.25	294.3454545	102.91424
7.8	1.9	1099.939394	1449.72973	60.875	62.5483871	289.037037	295.1296296	77.18568
26	8.9	1098.268293	1449	61.02222222	62.67857143	296.8039216	301.9818182	257.2856
31.2	10.9	1098.791667	1448.675	59.5	60.96969697	296.2115385	301.7307692	308.74272
15.91836735	5.02244898	1099.311111	1449.324324	60.08695652	62	293	297.5925926	157.5217959
24.96	8.5	1100.121951	1447.818182	59.57777778	61.15151515	294.0188679	299.509434	246.994176
11.7	3.4	1100.59375	1447.761905	60.14893617	61.78571429	291.3148148	296.9038462	115.77852
8.432432432	2.143243243	1100.219512	1451.295455	60.55319149	62	287.6315789	292.7777778	83.44397838
5.032258065	0.835483871	1098.969697	1448.918919	60.08571429	61.57692308	289.490566	293.9818182	49.7972129
31.2	10.9	1098.903226	1450.083333	60.15555556	61.92	290.4259259	294.462963	308.74272
14.51162791	4.481395349	1099.275	1448.789474	60.40909091	62.72413793	294.3148148	299.462963	143.6012651
12.73469388	3.797959184	1100.071429	1449.375	60.97826087	62.44	292.0181818	298.1272727	126.0174367
5.886792453	1.164150943	1100.25	1448.925	60.9375	62.74193548	295.3148148	301.4081633	58.2533434
4.588235294	0.664705882	1100.190476	1450.395349	60.23076923	62.10344828	289.7222222	294.9642857	45.40334118
8.914285714	2.328571429	1099.578947	1449.294118	61.14	62.84	293.7307692	299.1785714	88.21220571
5.2	0.9	1099.371429	1449.555556	61	62.53571429	294.8888889	300.8301887	51.45712
7.090909091	1.627272727	1099.74359	1449.463415	59.65714286	61.07142857	296.1320755	301.5	70.1688
17.82857143	5.757142857	1099.7	1448.405405	61.11111111	62.625	290.1132075	295.4363636	176.4244114
14.85714286	4.614285714	1099.727273	1449.526316	60.93877551	62.56666667	295.1481481	300.2037037	147.0203429
8.666666667	2.233333333	1099.805556	1449.690476	60.52272727	62.05555556	292.4727273	298.0925926	85.76186667
10.4	2.9	1098.939394	1450.975	60.02173913	61.79310345	296.7454545	301.8392857	102.91424
11.14285714	3.185714286	1099.808511	1448.512195	60.36363636	62.13793103	297.1886792	302.8888889	110.2652571
39	13.9	1099.74359	1448.357143	60.71428571	62.28	293.4363636	297.3333333	385.9284
39	13.9	1100	1448.413043	60.30232558	62.20833333	291.8518519	296.3818182	385.9284
18.57142857	6.042857143	1099.25641	1449.777778	60.7027027	62.28571429	293.5576923	299.5555556	183.7754286
10.4	2.9	1099.973684	1448.906977	59.79545455	61.33333333	291.3148148	295.8076923	102.91424
4.875	0.775	1100.15	1448.159091	60.07142857	62.38709677	290.9074074	296.2692308	48.24105
16.95652174	5.42173913	1100.594595	1448.311111	60.26190476	61.65	291.6603774	296.9074074	167.7949565
36	12.74615385	1099.272727	1450.674419	60.66666667	62.08	295.1428571	299.5090909	356.2416
20.8	6.9	1099.16129	1450.642857	60.33333333	62.17647059	296.0892857	300.5925926	205.82848
14.18181818	4.354545455	1098.657143	1448.425	60.8974359	62.10344828	289.9107143	295.7321429	140.3376
16	5.053846154	1099.638298	1448.978261	60.84210526	62.06896552	294.1296296	299.4716981	158.3296
14.18181818	4.354545455	1099.108696	1447.933333	59.54054054	61.84	291.6851852	295.8490566	140.3376
14.18181818	4.354545455	1100	1448.785714	58.775	60.47222222	292.6111111	297.254902	140.3376
16.13793103	5.106896552	1100.025641	1448.7	60.17948718	61.62962963	292.5555556	297.1607143	159.6945103
15.6	4.9	1099.977273	1449.095238	60.23255814	62	295.2156863	300.9245283	154.37136
9.75	2.65	1099.742857	1449.860465	60.23529412	61.95454545	293.4444444	298.5090909	96.4821
6.782608696	1.508695652	1099.189189	1448.454545	60.38095238	61.53333333	290.8867925	295.8363636	67.11798261
12.48	3.7	1099.6	1448.976744	60.09302326	62.3	294.1454545	298.6111111	123.497088
15.6	4.9	1100.030303	1449.974359	60.63043478	62.28571429	299.5740741	305.2352941	154.37136
26	8.9	1099.5	1450.675	59.91891892	61.44827586	293.7962963	297.7924528	257.2856
14.625	4.525	1099.529412	1448.820513	58.40909091	60.0625	292.6603774	297.1111111	144.72315
7.8	1.9	1099.571429	1449.567568	60.16666667	61.68	288.7090909	292.9090909	77.18568
12.48	3.7	1099.575758	1448.564103	58.70731707	60.33333333	291.462963	296.962963	123.497088
7.609756098	1.826829268	1099.884615	1449.314286	59.88095238	61.78947368	286.9464286	290.4444444	75.30310244
10.94736842	3.110526316	1099.6	1451.028571	60.05714286	61.6	292.6792453	298.8181818	108.3307789
31.2	10.9	1099.434783	1448.578947	60.4047619	62.30434783	294.8301887	300.0555556	308.74272
16.59574468	5.282978723	1099.541667	1450.5	60.43181818	62.47368421	292.6153846	296.2407407	164.2248511
15.91836735	5.02244898	1099.409091	1449.777778	60.55	62.07142857	294.1296296	297.9411765	157.5217959
22.28571429	7.471428571	1099.481481	1449.046512	60.30952381	61.96296296	295.3090909	300.3090909	220.5305143
13.86666667	4.233333333	1099.153846	1449.055556	60.06521739	61.5	291.9807692	296.9056604	137.2189867
22.28571429	7.471428571	1099.236842	1449.078947	59.65853659	61.48	287.0892857	292.9811321	220.5305143
17.33333333	5.566666667	1100.028571	1448.891892	58.64102564	60.7037037	287.0535714	292.4363636	171.5237333
62.4	22.9	1099.433333	1450.575	59.46666667	61.3255814	284.1454545	289.0185185	617.48544
6.5	1.4	1099.65	1449.512821	58.02702703	59.80555556	287.75	292.1785714	64.3214
13.76470588	4.194117647	1099.833333	1449.043478	57.82051282	59.64705882	287.4444444	291.8909091	136.2100235
12.23529412	3.605882353	1099.472222	1449.368421	55.04651163	56.5	289.8	294.6964286	121.0755765
10.75862069	3.037931034	1098.864865	1449.552632	58.5	60.11538462	294.1320755	299.3148148	106.4630069
9.75	2.65	1099.674419	1450.131579	59.51282051	61.51724138	290.9433962	295.6428571	96.4821
4.216216216	0.521621622	1099.282051	1449	60.48717949	61.92857143	290.3703704	295.8301887	41.72198919
6.5	1.4	1100.571429	1448.540541	58.9	60.64285714	290.5818182	296.2075472	64.3214
7.428571429	1.757142857	1099.825	1450.294118	55.11363636	56.94444444	292.4909091	298.1296296	73.51017143
11.14285714	3.185714286	1098.891892	1448.962963	58.79069767	60.31818182	293.8269231	299.1636364	110.2652571
10.63636364	2.990909091	1099.734694	1449.444444	60.28205128	61.95454545	290.9636364	297.0740741	105.2532
9.551020408	2.573469388	1100.044444	1448.9	60.52272727	62.03846154	291.5272727	297.5892857	94.51307755
33.42857143	11.75714286	1099.577778	1450.081081	59.21621622	61.19230769	295.4038462	300.6530612	330.7957714
21.27272727	7.081818182	1099.84375	1450.857143	59.225	61	289.2962963	294.5660377	210.5064
8.666666667	2.233333333	1099.886364	1449.977778	60.375	61.52	289.3148148	294.9285714	85.76186667
4	0.438461538	1099.311111	1449.125	60.28571429	61.73913043	290.2909091	294.5357143	39.5824
14.625	4.525	1099.045455	1449.558824	59.71875	62.16	299.3653846	303.7090909	144.72315
9.176470588	2.429411765	1099.023256	1449.514286	60.68085106	62.42307692	300.1111111	304.1730769	90.80668235
15.09677419	4.706451613	1099.444444	1448.783784	60.75555556	62.29166667	298.4150943	302.3214286	149.3916387
10.94736842	3.110526316	1099.894737	1448.840909	60.72093023	62.48	299.8	305.4150943	108.3307789
9.551020408	2.573469388	1099.634146	1449.538462	60.63043478	62.18181818	296.4814815	301.4259259	94.51307755
4.727272727	0.718181818	1100.552632	1450.078947	60.43902439	62.27777778	288.7407407	294.8363636	46.7792
22.28571429	7.471428571	1099.703704	1449.863636	60.11428571	62.05555556	290.7592593	295.54	220.5305143
17.33333333	5.566666667	1099.52	1450.105263	60.125	61.65384615	294.4117647	299.1320755	171.5237333
22.28571429	7.471428571	1099.4	1448.8	60.47058824	62.23809524	294.2	299.6603774	220.5305143
14.51162791	4.481395349	1099.84375	1448.727273	60.43589744	62.10526316	292.6981132	297.2075472	143.6012651
11.14285714	3.185714286	1099.25641	1449.02381	60.68888889	62.4	295.7818182	300.1454545	110.2652571
11.7	3.4	1099.560976	1449.95122	60.3	62.14285714	294.6727273	299.6071429	115.77852
22.28571429	7.471428571	1099.675	1448.487179	60.69444444	62.08695652	294.1090909	299.8148148	220.5305143
17.33333333	5.566666667	1100.568182	1448.414634	60.3902439	62.04166667	290.8518519	294.5740741	171.5237333
19.91489362	6.559574468	1100.567568	1449.325581	58.87179487	60.06451613	290.6181818	295.6785714	197.0698213
11.55555556	3.344444444	1100.371429	1450.342105	59.34210526	61.41666667	287.8888889	295.3018868	114.3491556
6.782608696	1.508695652	1098.428571	1450.636364	60.22857143	61.96296296	290.754717	296.7358491	67.11798261
13	3.9	1099.025641	1448.340909	60.21428571	62.08695652	293.1454545	300.0727273	128.6428
14.71698113	4.560377358	1100.5	1448.190476	60.16216216	62.1	293.5660377	298.9622642	145.6333585
62.4	22.9	1099.916667	1448.75	60.375	62.16666667	292.2075472	296.1296296	617.48544
15	4.669230769	1098.906977	1450.045455	59.91111111	61.72	297.0727273	301.1346154	148.434
22.28571429	7.471428571	1099.644444	1448.809524	60.25641026	62.28	291.0740741	295.5636364	220.5305143
18.13953488	5.876744186	1100.684211	1448.755102	60.6	62.29411765	296.56	302.1698113	179.5015814
7.090909091	1.627272727	1099.697674	1450.243902	56.79069767	58.37931034	290.1153846	295.6666667	70.1688
44.57142857	16.04285714	1099.204082	1451.146341	55.76744186	57.54545455	290.3269231	295.02	441.0610286
13.56521739	4.117391304	1100.918919	1449.272727	60.7	62.62962963	294.5576923	299.6346154	134.2359652
6.5	1.4	1099.536585	1450.553191	59.48	61.83333333	295.9056604	300.3846154	64.3214
9	2.361538462	1099.324324	1449.243902	59.56521739	61.5862069	295.7037037	300.6666667	89.0604
6.5	1.4	1100.380952	1451.06383	57.92857143	59.5862069	287.9636364	293.3518519	64.3214
9.176470588	2.429411765	1099.56	1448.575	57.08888889	59.46153846	292.7735849	297.2727273	90.80668235
6	1.207692308	1099.608696	1449.205128	57.57446809	59.97142857	290.6538462	294.75	59.3736
11.7	3.4	1099.692308	1449.894737	59.34090909	61.20689655	293.9056604	298.6491228	115.77852
12.48	3.7	1099.72	1451.777778	59.59090909	61.51851852	292.6226415	297.7307692	123.497088
4.105263158	0.478947368	1099.5	1449.545455	58.57777778	60.03125	289.8490566	295.0545455	40.62404211
14.85714286	4.614285714	1099.526316	1450.032258	58.94594595	60	291.7777778	297.3272727	147.0203429
19.5	6.4	1099.428571	1449.027027	56.27272727	58.06666667	295.6363636	299.9259259	192.9642
31.2	10.9	1099.176471	1448.909091	56.37209302	57.9	295.3818182	300.3962264	308.74272
17.33333333	5.566666667	1099.405405	1449.225	58.62222222	60.45454545	290.1346154	295.9821429	171.5237333
10.4	2.9	1099.428571	1448.454545	59.89583333	61.6875	290.462963	296.1666667	102.91424
25.16129032	8.577419355	1099.530612	1449.102564	59.86363636	61.4516129	292.0392157	297.7962963	248.9860645
9.36	2.5	1100.368421	1449.904762	59.58139535	61.25	293.0188679	297.245283	92.622816
44.57142857	16.04285714	1098.885714	1450.571429	60.06521739	61.70967742	288.7924528	293.6181818	441.0610286
17.72727273	5.718181818	1099.513514	1445.684211	58.02439024	59.64	291.745098	298.2075472	175.422
13	3.9	1099.638889	1449.959184	58.79545455	61.35714286	291.4363636	296.7272727	128.6428
13	3.9	1099.655172	1449.225	59.725	61.26666667	292.3018868	296.76	128.6428
14.625	4.525	1098.714286	1449.340909	59.90909091	61.80769231	290.9411765	296.6603774	144.72315
16.13793103	5.106896552	1016.86	1450.23913	60	61.73076923	288.4313725	293.8269231	159.6945103
8.666666667	2.233333333	905.0434783	1448.192308	58.17948718	60	293.3928571	296.3846154	85.76186667
14.71698113	4.560377358	1096.744681	1449.26087	59.76190476	61.27027027	291.2962963	295.5357143	145.6333585
14.625	4.525	860.8039216	1450.8	56.4	58.0625	290.34	295.2830189	144.72315
52	18.9	1099.891892	1449.918367	57.13636364	59.11764706	297.0377358	301.2592593	514.5712
7.255813953	1.690697674	1099.942857	1449.408163	57.06818182	58.92307692	298.8518519	304.2307692	71.80063256
12	3.515384615	1099.451613	1449.3125	55.52272727	56.75	287.0727273	293.1964286	118.7472
8.210526316	2.057894737	1099.323529	1448.744681	56.27272727	58.11428571	288.3272727	293.4181818	81.24808421
10.06451613	2.770967742	1099.473684	1450.568182	57.40909091	59.07407407	289.1538462	294.509434	99.59442581
19.5	6.4	1099.173913	1448.825	56.54054054	58.61904762	294.8703704	299.2075472	192.9642
11.7	3.4	1100.386364	1449.068182	57.47222222	59	296.4181818	301.2264151	115.77852
6	1.207692308	1099.795918	1451.446809	55.0212766	56.56521739	294.98	300.3461538	59.3736
22.28571429	7.471428571	1100.392857	1449.604651	55.55	57.14285714	297.6181818	302.3272727	220.5305143
10.17391304	2.813043478	1099.8125	1449.9	55.47619048	57.26086957	294.7307692	298.9019608	100.6769739
8.210526316	2.057894737	1099.621622	1449.404255	55.56521739	57.16666667	299.0185185	304.7777778	81.24808421
5.777777778	1.122222222	1099.625	1450.575	55.5	57.24	289.6785714	294.8888889	57.17457778
6.5	1.4	1099.605263	1447.934783	53.05882353	54.76923077	290.6603774	296.0535714	64.3214
4.105263158	0.478947368	1099.862069	1449.1	53.68181818	55.28	292.6	297.3928571	40.62404211
14.18181818	4.354545455	1099.103448	1449.234043	52.59090909	53.92307692	295.6981132	301.037037	140.3376
15.6	4.9	1099.971429	1449.390244	52.94594595	54.88	293.4727273	299.1296296	154.37136
12.73469388	3.797959184	1099.516129	1450.083333	53.55263158	55.16666667	295.6545455	301.6363636	126.0174367
13	3.9	1099.588235	1448.860465	53.875	55.96296296	295.9074074	301.2307692	128.6428
13.86666667	4.233333333	1099.2	1450.214286	53.18421053	54.96774194	296.7777778	299.8148148	137.2189867
18.35294118	5.958823529	1099.815789	1449.868421	53.2	54.95454545	295.4545455	300.7924528	181.6133647
20.8	6.9	1100	1449.6	53.675	55.16666667	298.3653846	302.6545455	205.82848
10.4	2.9	1098.918919	1449.425532	54.79487179	56.93103448	298.68	303.787234	102.91424
12.48	3.7	1099.309524	1447.75	55.92682927	57.80645161	295.1538462	299.7358491	123.497088
7.255813953	1.690697674	1099.95122	1449.142857	56.15909091	57.83333333	297.5686275	302.3962264	71.80063256
11.14285714	3.185714286	1099.7	1449.632653	55.6	57.76470588	293.2727273	297.2321429	110.2652571
13.56521739	4.117391304	1098.173913	1449.130435	48.5952381	50.33333333	291.3928571	296.8703704	134.2359652
11.7	3.4	1013.145833	1449.787234	47.225	48.93333333	292.3148148	298.6607143	115.77852
18.72	6.1	811.9534884	1449.288889	51.07692308	52.73333333	293.8888889	298.9454545	185.245632
9.176470588	2.429411765	1079.75	1448.5625	49.27027027	51.16	295.2156863	300.1923077	90.80668235
31.2	10.9	1099.459459	1449.5	49.34146341	50.90322581	291.6545455	295.8571429	308.74272
6.24	1.3	1097.69697	1450.022222	48.07894737	50	292.1538462	297.9074074	61.748544
10.17391304	2.813043478	900.625	1450.342105	52.63888889	54.11111111	289.1454545	295.0555556	100.6769739
10.88372093	3.086046512	1081.755556	1447.909091	48.18181818	49.85714286	288.9433962	294.2264151	107.7009488
7.8	1.9	800.0930233	1450.173913	48.375	50	285	289.4259259	77.18568
7.8	1.9	958.3953488	1450.377778	51.14634146	53.05882353	287.5576923	293.3818182	77.18568
15.6	4.9	1099.952381	1450.638298	54.79545455	56.34375	296.3653846	300.4230769	154.37136
36	12.74615385	1099.634146	1449.268293	57.22222222	58.96666667	296.2307692	301.1509434	356.2416
34.66666667	12.23333333	1099.333333	1450.176471	55.74418605	59.65116279	292.9811321	298.7407407	343.0474667
9.75	2.65	1099.611111	1449.962963	56.66666667	58.54545455	292.6363636	298.5818182	96.4821
10.17391304	2.813043478	1099.56	1448.764706	57.55813953	59.25	295.7962963	301.0384615	100.6769739
18.13953488	5.876744186	1099.322581	1448.771429	57.34042553	59.54285714	291.7678571	297.875	179.5015814
14.18181818	4.354545455	1099.391304	1450.205128	60.54761905	61.96969697	294.5740741	299.3148148	140.3376
31.2	10.9	1099.64	1449.789474	60.32	62.15151515	290.6851852	294.2727273	308.74272
5.777777778	1.122222222	1099.763158	1449.142857	58.21428571	60	289.3392857	294.0727273	57.17457778
12.64864865	3.764864865	1098.736842	1449.486486	53.02439024	54.47222222	291.4339623	296.0181818	125.1659676
52	18.9	1099.605263	1448.828571	55.7804878	57.55555556	291.2	295.5925926	514.5712
34.66666667	12.23333333	1099.789474	1449.302326	53.39583333	55.11764706	292.1666667	297.4464286	343.0474667
11.14285714	3.185714286	1099.795455	1450.25	49.63414634	51.26470588	293.6727273	299.1666667	110.2652571
5.777777778	1.122222222	1100.666667	1447.675	48.3902439	50.03030303	287.4375	293.8	57.17457778
44.57142857	16.04285714	1100.795455	1450.727273	50.15909091	52.16666667	292.8301887	297.6666667	441.0610286
52	18.9	1100.21875	1449.847826	51.54545455	53.37931034	292.2222222	296.7678571	514.5712
24	8.130769231	1099.575	1450.390244	53.19047619	54.64516129	295.0196078	300.0943396	237.4944
31.2	10.9	1099.27907	1449.690476	55	56.57142857	295.0188679	300.8867925	308.74272
19.5	6.4	1100.047619	1449.466667	57.01923077	58.72222222	290.3846154	296.0545455	192.9642
7.090909091	1.627272727	1100.270833	1448.575	52.62857143	54.21212121	294.245283	299.7037037	70.1688
8	1.976923077	1100.162162	1449.911111	51.075	53.11428571	298.8363636	303.5740741	79.1648
13	3.9	1099.447368	1451.647059	53.14285714	54.48484848	293.0769231	298.0392157	128.6428
9	2.361538462	1100.025	1448.609756	50.7	52.58064516	293.2105263	297.2857143	89.0604
2.943396226	0.032075472	1099.472222	1450.2	49.16666667	50.85714286	291.3392857	295.9259259	29.1266717
17.82857143	5.757142857	1099.5	1449.351351	46.54761905	48.92857143	291.5555556	295.2307692	176.4244114
9.75	2.65	1099.774194	1448.647059	51.61904762	53.61904762	290.3333333	295.7090909	96.4821
22.28571429	7.471428571	1099.676471	1449.236842	50.13157895	51.84375	288.0925926	293.8035714	220.5305143
15.6	4.9	1099.516129	1449.483871	49.23684211	51.06896552	298	302.7115385	154.37136
4.333333333	0.566666667	1099.390244	1449.0625	49.24390244	50.67647059	292.2777778	296.3454545	42.88093333
13	3.9	1099.586207	1449.818182	49.93181818	51.58974359	292.5925926	299.1296296	128.6428
19.5	6.4	1098.970588	1450.025	48.75	50.39393939	297.9433962	303.5	192.9642
10.75862069	3.037931034	1100.142857	1448.4	50.88095238	52.6875	292.0377358	297.8181818	106.4630069
31.2	10.9	1100.033333	1449.348837	55.35555556	57.23333333	295.627451	300.962963	308.74272
22.28571429	7.471428571	1099.526316	1449.371429	53.0952381	54.58064516	292.1111111	297.037037	220.5305143
312	118.9	1099.9	1450.235294	57.57894737	59.11538462	299.8	304.7407407	3087.4272
12	3.515384615	1099.709677	1449.942857	57.4893617	59.22580645	295.6111111	299.509434	118.7472
26	8.9	1099.757576	1449.527778	54.13953488	55.42424242	295.5849057	300.3703704	257.2856
3.804878049	0.363414634	1099.678571	1449.433333	54.15555556	55.71875	292.8846154	297.6181818	37.65155122
4.105263158	0.478947368	1100.242424	1449.486486	52.74358974	54.68571429	295.2727273	300.3207547	40.62404211
13	3.9	1099.580645	1450.342857	51.54545455	54.06451613	293.9245283	300.1132075	128.6428
11.14285714	3.185714286	1099.388889	1449.735294	51.725	53.72413793	290.0576923	296.5636364	110.2652571
16.42105263	5.215789474	1099.103448	1449.181818	53.41860465	55.18181818	287.3214286	293.8039216	162.4961684
13.56521739	4.117391304	1098.791667	1448.911765	50.37209302	51.89655172	286.8113208	293.1481481	134.2359652
11.14285714	3.185714286	1099.577778	1448.432432	50	51.46875	292.4642857	298.4716981	110.2652571
13	3.9	1100.682927	1449.065217	49.02272727	50.79310345	293.7884615	298	128.6428
9.75	2.65	1098.511628	1448.8	46.3	47.75757576	294.4814815	299.3272727	96.4821
12	3.515384615	1099.885714	1449.047619	48.75	50.375	289.1403509	294.1607143	118.7472
22.28571429	7.471428571	1099.533333	1448.553191	48.30434783	50.07407407	295.5714286	300.3518519	220.5305143
4.333333333	0.566666667	1100.435897	1450.216216	48.27906977	50.17241379	292.2181818	296.4464286	42.88093333
6.24	1.3	1098.844444	1449.516129	48.33333333	50.09090909	290.7592593	295.6964286	61.748544
12.48	3.7	1100	1449.666667	51.88888889	53.75862069	294.4339623	299.4150943	123.497088
13	3.9	1099.942857	1448.65625	48.34042553	50.07407407	289.5576923	295.5660377	128.6428
15	4.669230769	1100.166667	1448.55814	49.85365854	52	295.6862745	299.6603774	148.434
19.5	6.4	1099.785714	1451.205128	51.41025641	52.81481481	293.5660377	298.754717	192.9642
26	8.9	1098.736842	1449.418605	53.85714286	55.82758621	296.2407407	301	257.2856
20	6.592307692	1099.052632	1448.605263	54.26666667	55.9375	296.0925926	300.2692308	197.912
12.64864865	3.764864865	1099.882353	1448.605263	53.84444444	55.65517241	293.5	298.1153846	125.1659676
4.333333333	0.566666667	1099.545455	1450.463415	53.48837209	55.13333333	288.7647059	295.1698113	42.88093333
12.48	3.7	1099.567568	1448.15	50.95348837	52.74285714	293.6785714	297.5185185	123.497088
20.8	6.9	1099.594595	1449.194444	52.325	53.85714286	292.7692308	298.462963	205.82848
9.36	2.5	1100.952381	1447.731707	51	52.76923077	288.8301887	294.6923077	92.622816
5.379310345	0.968965517	1099.578947	1448.46875	50.75	52.78125	290.8703704	297.7678571	53.23150345
78	28.9	1099.517241	1449.463415	50.16666667	51.74285714	289.8148148	295.0185185	771.8568
14.44444444	4.455555556	1099	1449.289474	53.02222222	54.74285714	294.4528302	298.462963	142.9364444
18.72	6.1	1099.4	1449.4	53	54.91428571	295.4545455	301.3703704	185.245632
15	4.669230769	1099.413793	1448.974359	52.97674419	54.82142857	296.7454545	301.6296296	148.434
15.6	4.9	1099.56	1449.170732	53.02439024	54.77777778	296.6181818	300.9642857	154.37136
7.428571429	1.757142857	1099.857143	1449.073171	53.30952381	54.91666667	297.0545455	300.75	73.51017143
15.2195122	4.753658537	1099.666667	1450	50.3255814	51.875	294.0909091	297.8703704	150.6062049
14.18181818	4.354545455	1099.636364	1449.216216	48.7804878	50.82051282	296.5555556	299.7884615	140.3376
14.18181818	4.354545455	1099.478261	1449.447368	49.59090909	51.81081081	294.6603774	299.1851852	140.3376
312	118.9	1099.210526	1449.820513	53	54.71428571	293.9642857	296.1923077	3087.4272
3.627906977	0.295348837	1099.69697	1448.342857	53.2173913	54.86206897	296.0925926	299.3846154	35.90031628
16.42105263	5.215789474	1099.688889	1449.534884	53.30769231	55.03333333	295.8	296.8909091	162.4961684
19.5	6.4	1099.828571	1448.540541	52.56521739	54.41935484	292.3333333	294.8518519	192.9642
11.41463415	3.290243902	1100.057143	1448.957447	52.81395349	54.4516129	292.4821429	296.9090909	112.9546537
52	18.9	1100.085714	1449.114286	52.82978723	54.73333333	292.6181818	295.1296296	514.5712
13	3.9	1099.903226	1449.025641	53.1	55.03571429	297.6851852	299.7777778	128.6428
18.90909091	6.172727273	1099.85	1450.078947	53.28571429	55.03846154	293.4615385	297.3928571	187.1168
14.51162791	4.481395349	1100.033333	1449.344828	53.20454545	54.77777778	292.25	296.3207547	143.6012651
13.56521739	4.117391304	1098.612903	1450.542857	52.31914894	53.91304348	296.7272727	300.4117647	134.2359652
14.85714286	4.614285714	1099.714286	1448.371429	52.54054054	54.37931034	294.4035088	297.7454545	147.0203429
7.090909091	1.627272727	1100.351351	1449.263158	52.92857143	54.5	296.9814815	299.4181818	70.1688
9.454545455	2.536363636	1099.463415	1449.666667	51.90697674	53.66666667	292.3461538	294.6296296	93.5584
22.28571429	7.471428571	1098.90625	1450.16129	53.17391304	55	295.3207547	298.5535714	220.5305143
5.571428571	1.042857143	1099.647059	1448.763158	53.1627907	54.84375	293.5818182	295.7894737	55.13262857
9.551020408	2.573469388	1100	1451.27907	52.6	54.38461538	294.3272727	298.3269231	94.51307755
3.714285714	0.328571429	1099.606061	1449.605263	52.42553191	54.06896552	296.6415094	301.1509434	36.75508571
14.18181818	4.354545455	1099.560976	1449.489362	52.175	53.91666667	293.7222222	298.2909091	140.3376
9.454545455	2.536363636	1099.418605	1448.782609	49.06818182	50.64705882	293.4736842	295.8181818	93.5584
9.176470588	2.429411765	1100.2	1448.931818	52.44444444	54.21212121	294.5454545	298.0754717	90.80668235
7.8	1.9	1099.731707	1449.214286	53.0625	54.96551724	294.1886792	296.6346154	77.18568
13	3.9	1099.846154	1449.090909	53.17948718	55.04347826	301.4230769	307.0816327	128.6428
19.5	6.4	1099.391304	1450.119048	53.15384615	54.91176471	295.3846154	297.4545455	192.9642
28.36363636	9.809090909	1099.518519	1448.97619	52.1025641	53.5	294.0178571	298.2321429	280.6752
14.18181818	4.354545455	1099.92	1450.368421	51.34883721	53.21428571	294.5185185	296.9814815	140.3376
13	3.9	1099.45	1448.558824	53.54761905	55.2173913	296.2280702	300.372549	128.6428
9	2.361538462	1099.48	1450.707317	52.97674419	54.62962963	299.9795918	303.9230769	89.0604
39	13.9	1099.588235	1448.675676	49.35897436	50.94594595	298.6538462	302.3888889	385.9284
9.176470588	2.429411765	1099.56	1449.485714	48.9	50.88888889	297.4285714	302.7090909	90.80668235
20.34782609	6.726086957	1099.827586	1448.857143	53.69444444	55.8	292.4285714	295.8909091	201.3539478
52	18.9	1099.6	1449.395349	53.07692308	54.80645161	293.5471698	297.037037	514.5712
52	18.9	1099.594595	1449.65625	53.45833333	55.32258065	296.2727273	299.2264151	514.5712
6	1.207692308	1098.837838	1449.210526	49.92307692	51.79166667	294.7115385	298.8703704	59.3736
31.2	10.9	1099.358974	1449.052632	48.24390244	50.23076923	296.1636364	297.5192308	308.74272
4.105263158	0.478947368	1099.707317	1449.510204	49.2	51.18518519	289.5	293.6545455	40.62404211
28.36363636	9.809090909	1100.65	1448.130435	53.80487805	55.56	302.3396226	306.0961538	280.6752
27.52941176	9.488235294	1099.275	1451.697674	53.69767442	55.7826087	301.9814815	305.7735849	272.4200471
24	8.130769231	1099.612903	1448.317073	53.14285714	55.52173913	296.0566038	299.509434	237.4944
31.2	10.9	1098.933333	1449.102564	53.71428571	55.52631579	294.0892857	297.2321429	308.74272
14.18181818	4.354545455	1099.823529	1449.25	53.5	55.34782609	297.1153846	301.2692308	140.3376
13.56521739	4.117391304	1100.125	1449.315789	53	54.96666667	295.8367347	299.4150943	134.2359652
14.71698113	4.560377358	1100.060606	1450.675676	52.94871795	54.88888889	293.9038462	297.1607143	145.6333585
39	13.9	1099.3125	1449.425	53.91489362	55.64	291.8867925	296.9433962	385.9284
52	18.9	1099.193548	1448.69697	53.58974359	55.60714286	293.6727273	296.125	514.5712
78	28.9	1099.081081	1448.534884	53.5	55.54166667	293.8431373	296.037037	771.8568
4.727272727	0.718181818	1099.775	1449.333333	53.37209302	55.4	294.5	297.2181818	46.7792
11.14285714	3.185714286	1099.84375	1449.785714	53.48648649	55.39130435	293.4807692	297.3571429	110.2652571
14.625	4.525	1100.636364	1449.045455	53.30952381	55.66666667	299.5454545	301.7592593	144.72315
13	3.9	1099.588235	1450.333333	52.65909091	54.53571429	296.1666667	299.6734694	128.6428
10.4	2.9	1099.46875	1448.642857	52.68181818	54.57142857	294.2181818	297.0892857	102.91424
11.41463415	3.290243902	1099.413793	1449.75	53.55263158	55.57692308	296.3148148	299.4339623	112.9546537
17.33333333	5.566666667	1098.892857	1449.575	54.02222222	55.62068966	296.5818182	298.3214286	171.5237333
22.28571429	7.471428571	1099.4	1448.833333	53.72340426	55.28571429	295.1454545	296.2	220.5305143
19.5	6.4	1100.263158	1449.641026	53.67567568	55.66666667	293.3703704	297.5283019	192.9642
12	3.515384615	1099.942857	1449.025641	53.25714286	54.90909091	292.8113208	297.6363636	118.7472
18.57142857	6.042857143	1099.103448	1449.512195	52.62790698	54.72413793	292.5818182	295.8113208	183.7754286
39	13.9	1099.511628	1449.212121	52.87804878	54.32	293.9814815	296.7777778	385.9284
13.27659574	4.006382979	1099.566667	1449.108696	53.46153846	55.5862069	291.0408163	296.1454545	131.3798809
9.75	2.65	1099.432432	1449.44186	53.81578947	55.5	295	300.1509434	96.4821
14.18181818	4.354545455	1097.512195	1451.527778	53.56097561	55.5	295.0196078	299.8333333	140.3376
9.176470588	2.429411765	1100.393939	1448.75	53.05128205	55.17857143	294.462963	298.9807692	90.80668235
4.216216216	0.521621622	1100.210526	1451.021739	53.41025641	55.38095238	294.3018868	297.5090909	41.72198919
13	3.9	1098.466667	1450.088235	53.60869565	54.96	293.6785714	298.1454545	128.6428
9.75	2.65	1100.418605	1448.8	53.63636364	55.33333333	293.1666667	296.8181818	96.4821
7.428571429	1.757142857	1099.864865	1448.977778	53.52777778	55.29166667	293.8	297.3818182	73.51017143
16.42105263	5.215789474	1100.333333	1449.902439	53.48837209	55.15789474	297.6981132	300.75	162.4961684
6.5	1.4	1099.26087	1450.333333	53.92307692	55.64	294.2352941	297.4285714	64.3214
24	8.130769231	1099.62963	1449.405405	53.80487805	55.5	294.0535714	298.7272727	237.4944
4	0.438461538	1099.291667	1449.823529	53.37142857	54.76923077	294.5294118	295.8888889	39.5824
28.36363636	9.809090909	1098.567568	1449.69697	52.62790698	54.42307692	291.8301887	294.245283	280.6752
21.27272727	7.081818182	1098.764706	1448.323529	51.79487179	53.55172414	293.9038462	297.7307692	210.5064
12	3.515384615	1099.342857	1448.261905	52.85	54.69230769	293.5740741	295.7058824	118.7472
8.666666667	2.233333333	1100.285714	1448.363636	53.725	55.37931034	294.5	297.9818182	85.76186667
16.42105263	5.215789474	1099.410256	1449.952381	52.85	54.67741935	295.2777778	298.6181818	162.4961684
13	3.9	1099.657143	1449.390244	52.70454545	54.86363636	295.6909091	298.5576923	128.6428
14.85714286	4.614285714	1098.944444	1449.65	50.19512195	52.37037037	291.6296296	296.3454545	147.0203429
22.28571429	7.471428571	1100.155556	1448.307692	50.37209302	52.06896552	291.9074074	298.0740741	220.5305143
31.2	10.9	1099.478261	1450.837209	53.28947368	54.88888889	294.4814815	296.9636364	308.74272
9.176470588	2.429411765	1099.642857	1449.27027	53.07142857	54.88461538	293.6111111	297.2142857	90.80668235
52	18.9	1099.5	1449.7	53.37209302	55.06666667	295.2244898	298.9433962	514.5712
31.2	10.9	1099.5	1449.243902	53.375	55.12903226	295.537037	298.9811321	308.74272
16.13793103	5.106896552	1099.5	1449.135135	51.47619048	53.29411765	290.7592593	295.3090909	159.6945103
9.551020408	2.573469388	1099.68	1450.086957	52.5952381	54.26666667	294.8148148	298.2407407	94.51307755
17.82857143	5.757142857	1099.705882	1449.555556	52.39130435	54.06896552	294.9245283	298.6909091	176.4244114
9.75	2.65	1099.5	1448.75	52	54	289.7857143	292.1272727	96.4821
39	13.9	1099.227273	1449.545455	51.97727273	53.94117647	282.0188679	285.9090909	385.9284
17.33333333	5.566666667	1099.470588	1449.2	52.25531915	53.96666667	293.1886792	297.7222222	171.5237333
52	18.9	1098.606061	1448.475	52.23255814	53.96428571	291.82	297.1176471	514.5712
10.4	2.9	1099.736842	1449.157895	52.76086957	54.61290323	288.3333333	291.8	102.91424
31.2	10.9	1100.139535	1448.902439	52.41463415	54.03571429	291.1481481	295.5925926	308.74272
19.5	6.4	1099.333333	1450.305556	50.56818182	51.80645161	292.8035714	295.6607143	192.9642
12	3.515384615	1100.297297	1449.04878	52.52631579	54.05555556	293.84	297	118.7472
6.782608696	1.508695652	1098.862069	1450.6	52.2	53.76190476	290.1454545	293.2884615	67.11798261
4.588235294	0.664705882	1098.611111	1447.52381	52.30232558	54.1	285.4259259	289.0909091	45.40334118
104	38.9	1099.116279	1448.119048	52.04444444	53.96296296	292.9811321	296.5	1029.1424
39	13.9	1100.558824	1450.066667	50.84782609	52.91304348	294.7678571	297.2037037	385.9284
10.4	2.9	1099.972973	1449.324324	48.63157895	50.59259259	292.5849057	295.6981132	102.91424
8.210526316	2.057894737	1099.46875	1450.095238	47.52272727	49.58823529	294.8545455	298.0588235	81.24808421
15.6	4.9	1098.645161	1449.666667	47.13953488	49.25806452	293.4107143	296.2545455	154.37136
6.782608696	1.508695652	1099.384615	1450.093023	50	52.09090909	297.2941176	302.3269231	67.11798261
3.714285714	0.328571429	1099.138889	1449.947368	53.29411765	55.03448276	295.2181818	299.8	36.75508571
9.75	2.65	1100.151515	1449.069767	52.84782609	54.68	294.4423077	297.7777778	96.4821
9.454545455	2.536363636	1099.365854	1450.25	52.68085106	54.4137931	298.5263158	302.6727273	93.5584
3.183673469	0.124489796	1098.911765	1449.333333	53.13043478	54.73529412	293.5555556	298.1764706	31.50435918
9	2.361538462	1098.92	1448.74359	52.93181818	54.92592593	294.8301887	299.0545455	89.0604
8	1.976923077	1099.72093	1450.069767	53	54.87096774	296.5	301.8727273	79.1648
13.56521739	4.117391304	1100.151515	1449.295455	53	54.81818182	296.9107143	300.2941176	134.2359652
31.2	10.9	1099.641026	1449.622222	53	54.96	296.7647059	299.7307692	308.74272
14.51162791	4.481395349	1100.102564	1450	52.68181818	54.66666667	295.8627451	298.8679245	143.6012651
39	13.9	1099.59375	1450.121951	53.18604651	54.93333333	293.6181818	296.2641509	385.9284
12.73469388	3.797959184	1099.823529	1449.363636	52.8372093	54.58064516	297.6181818	300.7962963	126.0174367
9.75	2.65	1099.487179	1449.511628	53.25531915	55	296.9259259	300.4074074	96.4821
26	8.9	1098.6875	1450.404762	52.91304348	54.75	295.4259259	297.9090909	257.2856
14.85714286	4.614285714	1099.675	1450.235294	50.64285714	52.65217391	297.3272727	301.2363636	147.0203429
16.86486486	5.386486486	1099.548387	1449.735294	50.45238095	52.57142857	298.6415094	302.8928571	166.8879568
18.13953488	5.876744186	1099.46875	1448.909091	50.90243902	52.6	297.245283	302.1960784	179.5015814
10.06451613	2.770967742	1100.275862	1449.02381	50.39473684	52.47826087	295.7962963	299.9814815	99.59442581
16.86486486	5.386486486	1099.903226	1450.135135	50.62857143	52.5	299.7777778	302.9074074	166.8879568
18.50847458	6.018644068	1099.705882	1449.466667	51.76744186	53.8	303.5384615	308.1875	183.152461
12.73469388	3.797959184	1099.72973	1449.710526	53.29787234	55	301.0178571	305.8867925	126.0174367
13.56521739	4.117391304	1099.512821	1449.903226	53.29166667	54.93548387	298.0566038	302.1886792	134.2359652
13.37142857	4.042857143	1099.419355	1449.432432	52.95121951	54.93548387	297.3333333	301.2181818	132.3183086
18.57142857	6.042857143	1099.4	1449.235294	52.88095238	54.75	301.8490566	304.2592593	183.7754286
10.4	2.9	1099.5	1449.794872	48.6744186	50.56666667	298.3214286	300.9821429	102.91424
14.51162791	4.481395349	1098.913043	1449.212121	45.15555556	47.18518519	290.8727273	294.3396226	143.6012651
7.428571429	1.757142857	1099.514286	1449.051282	45.36956522	47.05555556	289.4150943	291.5185185	73.51017143
26	8.9	1099.571429	1449.025	45.04545455	46.55555556	294.0925926	297.0740741	257.2856
19.5	6.4	1099.621622	1449.666667	44.55813953	46.46666667	296.4727273	299.3518519	192.9642
24	8.130769231	1099.8125	1449.311111	48.8	50.8125	295.1818182	298.3518519	237.4944
15.09677419	4.706451613	1099.717949	1449.414634	53.11111111	54.8	298.68	300.8823529	149.3916387
18.35294118	5.958823529	1099.02381	1448.410256	51.92857143	53.63333333	295.4464286	298.8392857	181.6133647
22.28571429	7.471428571	1099.575	1449.590909	53.30232558	55	299.8	304.25	220.5305143
4	0.438461538	1100.352941	1448.914286	52.73333333	54.48387097	302.9583333	306.8163265	39.5824
8.509090909	2.172727273	1099.972973	1451.342105	49.16216216	51	295.3454545	299.7894737	84.20256
4.105263158	0.478947368	1099.225806	1449.171429	52.95454545	54.44827586	294.0377358	297.4909091	40.62404211
13.56521739	4.117391304	1100.5	1449.076923	52.375	54.1	294.7358491	298.4615385	134.2359652
7.255813953	1.690697674	1099.727273	1451.030303	51.08163265	52.86206897	295.9636364	300.1666667	71.80063256
10.75862069	3.037931034	1099.5	1449.769231	52.04878049	53.69230769	296.0740741	298.9615385	106.4630069
8.914285714	2.328571429	1099.47619	1449.454545	50.07142857	51.67857143	296.0181818	297.7884615	88.21220571
22.28571429	7.471428571	399.452381	1449.833333	63.12	64.68965517	299.6862745	303.7843137	220.5305143
20.8	6.9	399.7234043	1449.255814	63.28846154	64.85714286	300.4528302	305.1730769	205.82848
14.85714286	4.614285714	399.7111111	1449.675676	60.875	62.40625	297	300.490566	147.0203429
4.457142857	0.614285714	399.65	1449.263158	61.93023256	63.61290323	295.1272727	299.3571429	44.10610286
7.8	1.9	399.75	1449.628571	62.06976744	63.81481481	294.4210526	297.4736842	77.18568
6.24	1.3	561.8888889	1449.444444	61.82	63.44117647	293.0727273	296.3703704	61.748544
20.52631579	6.794736842	1098.617647	1449.575	61.36170213	63.5862069	297.0545455	300.4642857	203.1202105
6.24	1.3	1099.333333	1450.243243	60.97674419	62.48387097	293.0727273	297.6346154	61.748544
6.638297872	1.453191489	1099.625	1449.421053	61.95744681	63.29166667	295.2181818	298.5471698	65.68994043
5.2	0.9	1099.296296	1449.578947	61.02040816	62.85294118	295	299	51.45712
13	3.9	1099.12	1449.473684	61.84313725	63.34615385	294.9615385	298.0377358	128.6428
34.66666667	12.23333333	1099.323529	1448.756757	62.47826087	64.375	295.25	298.4727273	343.0474667
31.2	10.9	1099.451613	1449.071429	63.04255319	64.75	296.1272727	301.0555556	308.74272
31.2	10.9	1099.387097	1449.416667	62.58139535	64.51851852	294.5357143	297.9454545	308.74272
11.14285714	3.185714286	1099.378378	1449.833333	62.95454545	64.71428571	294.7454545	298.037037	110.2652571
26	8.9	1099.542857	1449.25641	62.87804878	64.48387097	294.2857143	298.037037	257.2856
24	8.130769231	1099.657143	1450	62.79591837	64.82142857	294.2222222	298.8148148	237.4944
39	13.9	1098.424242	1450.926829	57.11627907	58.94117647	293.5263158	296.9433962	385.9284
26	8.9	1099.4	1448.522727	54.76086957	56.31034483	295.8653846	299.7647059	257.2856
28.36363636	9.809090909	1100.029412	1450.325581	55.9047619	57.67647059	291.9622642	295.2222222	280.6752
13.68421053	4.163157895	1099.465116	1450.222222	53.73809524	55.24324324	289.8653846	293.8148148	135.4134737
13.86666667	4.233333333	1098.860465	1449.72973	56.13157895	57.96296296	292.6363636	296.7924528	137.2189867
7.255813953	1.690697674	1099.651163	1449.421053	56.04878049	57.34375	298.5636364	300.7090909	71.80063256
13.76470588	4.194117647	1099.434783	1450.121951	57.06976744	58.91176471	295.5	299.4181818	136.2100235
34.66666667	12.23333333	1099.857143	1449.068182	57.02380952	58.88571429	294.9636364	299.5	343.0474667
39	13.9	1099.243902	1449.277778	54.76744186	56.6875	291.1698113	293.3148148	385.9284
10.4	2.9	1099.527778	1449.25641	57.31707317	59	295.8545455	299.3928571	102.91424
5.2	0.9	1100.216216	1450.083333	56.29545455	57.90909091	293.4545455	297.3090909	51.45712
15.6	4.9	1100.297297	1449.55814	57.14285714	59.10344828	296.4528302	300.490566	154.37136
24	8.130769231	1099.433333	1449.214286	55.92682927	58.23076923	296.3396226	299.1090909	237.4944
6.24	1.3	1099.942857	1448.815789	57.02272727	59	295.9803922	298.76	61.748544
8.509090909	2.172727273	1099.771429	1449.097561	56.51219512	58.1875	297.6078431	301.6415094	84.20256
9.176470588	2.429411765	1099.555556	1449.465116	57.74358974	58.85714286	296.46	301.0961538	90.80668235
9.176470588	2.429411765	1098.8	1449.825	57.25531915	59.15625	295.5740741	300.5925926	90.80668235
19.5	6.4	1099	1449.52381	57.34883721	58.84615385	298.1132075	300.7962963	192.9642
9.36	2.5	1100.086957	1450.057143	56.84090909	58.81818182	291.4642857	295.1666667	92.622816
13.76470588	4.194117647	1099.411765	1449.463415	57.13513514	58.77777778	295.5660377	299.3214286	136.2100235
11.41463415	3.290243902	1099.538462	1449.372093	56.75	58.46666667	294.8363636	299.3148148	112.9546537
18.35294118	5.958823529	1099.862069	1449.72973	58.86046512	60.88235294	303.4489796	306.9791667	181.6133647
17.33333333	5.566666667	1099.277778	1449.9	60.95454545	62.93333333	299.9245283	304.8571429	171.5237333
9.176470588	2.429411765	1098.68	1449.676471	61.22916667	62.75862069	298.8039216	302.96	90.80668235
3.804878049	0.363414634	1098.416667	1449.292683	60.95833333	62.62068966	297.5	302.4807692	37.65155122
10.88372093	3.086046512	1099.636364	1449.104167	60.68181818	62.84	297.0181818	299.2407407	107.7009488
4	0.438461538	1099.888889	1449.043478	61.04166667	62.875	293.9642857	296.9444444	39.5824
13	3.9	1100.28125	1450.75	60.81578947	62.10344828	294.4464286	297.2745098	128.6428
39	13.9	1099.666667	1451.311111	60.97674419	62.84375	293.0714286	297.7454545	385.9284
44.57142857	16.04285714	1099.230769	1448.357143	61.05714286	62.875	295.5357143	299.0769231	441.0610286
5.473684211	1.005263158	1099.448276	1449.590909	61.02222222	62.82142857	296.1090909	299.8461538	54.16538947
6.117647059	1.252941176	1099.28125	1449.133333	60.90909091	62.66666667	293.5660377	296.3636364	60.53778824
14.18181818	4.354545455	1100.15625	1450.222222	60.24390244	62.25	292.0545455	295.6730769	140.3376
26	8.9	1099.794118	1450.25	60.84615385	62.52	295.754717	299.0909091	257.2856
9.454545455	2.536363636	1099.310345	1449.674419	61.16666667	62.84615385	295.7037037	299.8846154	93.5584
24.63157895	8.373684211	1099.315789	1449.315789	60.09090909	61.93333333	298.0192308	301.509434	243.7442526
8.210526316	2.057894737	1099.580645	1449.302326	60.45238095	62.60869565	296.1538462	299.7636364	81.24808421
12	3.515384615	1099.9375	1449.0625	58.71428571	60.75	293.6078431	298.3518519	118.7472
8.666666667	2.233333333	1099.735294	1448.755556	55.41860465	57.32258065	292.125	294.6603774	85.76186667
10.17391304	2.813043478	1099.119048	1450.022727	57.47727273	59.5	292.5192308	296.5283019	100.6769739
11.14285714	3.185714286	1099.27027	1449.644444	60.93478261	62.65384615	295.5925926	300.0740741	110.2652571
11.55555556	3.344444444	1099.921053	1448.913043	59.63829787	61.58823529	293.3571429	297.0384615	114.3491556
7.8	1.9	1100.277778	1449.755102	60.23404255	62.06451613	295.0727273	298.3773585	77.18568
10.4	2.9	1099.74359	1450.790698	59.93617021	61.5625	293.1272727	298.1272727	102.91424
17.33333333	5.566666667	1099.302326	1448.555556	60.02173913	62.20689655	293.6792453	297.6181818	171.5237333
13.27659574	4.006382979	1099.931034	1448.171429	57.4375	59.33333333	294.5714286	298.0377358	131.3798809
14.85714286	4.614285714	1100.439024	1450.136364	60.03921569	61.72413793	296.7169811	301.8703704	147.0203429
13	3.9	1099.153846	1448.32	58.74074074	59.91836735	298.4528302	302.7647059	128.6428
13	3.9	1099.772727	1449.933333	57.83673469	59.30434783	296.2181818	300.0943396	128.6428
12.48	3.7	1099.5	1449.342857	58.97674419	60.36363636	294.8545455	298.8363636	123.497088
39	13.9	1099.451613	1448.8	60.40816327	60.97058824	297.245283	301.7222222	385.9284
31.2	10.9	1099.684211	1447.682927	57.3	59.725	291.7592593	293.7	308.74272
3	0.053846154	1100.074074	1450.854167	59.82	61.225	291.4736842	295.3962264	29.6868
16.25	5.15	1099.4	1450.95122	58.84313725	59.62222222	294.8113208	298.2181818	160.8035
17.33333333	5.566666667	1099.583333	1449.972222	57.125	60.03846154	291.2641509	294.5961538	171.5237333
31.2	10.9	1099.5	1450.205128	58.39583333	59.30769231	294.8888889	298.6111111	308.74272
8.914285714	2.328571429	1099.4	1449.684211	58.76595745	60.7173913	291.4181818	294.6607143	88.21220571
16.42105263	5.215789474	1099.533333	1449.512821	61	62.34375	293.3584906	294.7115385	162.4961684
31.2	10.9	1099	1449.368421	60.29545455	62.34285714	289.4	293.0754717	308.74272
5.288135593	0.933898305	1099.758621	1449.815789	58.38636364	60.85365854	288.8181818	292.6071429	52.32927458
28.36363636	9.809090909	1099.294118	1450.088235	59.65909091	60.90625	293.7407407	296.0535714	280.6752
4.875	0.775	1099.25	1449.040816	59.71111111	60.96875	295.2727273	298.1636364	48.24105
15.09677419	4.706451613	1099.421053	1449.682927	61.28888889	62.87096774	293.2264151	296.8363636	149.3916387
28.36363636	9.809090909	1099.025	1449.609756	61.23529412	62.91304348	297.0363636	300.4181818	280.6752
22.28571429	7.471428571	1099.916667	1449.47619	60.5952381	62.34285714	294	298.1764706	220.5305143
34.66666667	12.23333333	1099.315789	1449.236842	60.42857143	62.24137931	289.6296296	294.754717	343.0474667
10.75862069	3.037931034	1100.029412	1449.847826	59.79069767	61.45714286	292.5490196	294.6226415	106.4630069
78	28.9	1099.658537	1449.74359	58.77272727	60.21212121	297.1320755	299.6153846	771.8568
12.23529412	3.605882353	1099.612903	1449.243243	60.75609756	62.51851852	290.8703704	294.7857143	121.0755765
8.210526316	2.057894737	1099.421053	1449.4	60.74358974	62.65217391	295.2830189	298.9038462	81.24808421
12	3.515384615	1099.375	1449.122449	60.48717949	62.38095238	293.2181818	297.5961538	118.7472
7.255813953	1.690697674	1099.425	1449.652174	60.31818182	62.30769231	290.0727273	291.0961538	71.80063256
5.379310345	0.968965517	1099.139535	1449.176471	60	61.96153846	294.7272727	296.2037037	53.23150345
16.42105263	5.215789474	1099.947368	1449.575	56.53658537	58	289.9056604	293.4489796	162.4961684
5.886792453	1.164150943	1099.4	1449.128205	58.86842105	60.74193548	293.0925926	297.1153846	58.2533434
13	3.9	1099.71875	1449.422222	60.15555556	61.96875	293.962963	298.5454545	128.6428
2.943396226	0.032075472	1099.705882	1449.871795	59.90740741	61.12244898	294.8909091	298.7678571	29.1266717
9.454545455	2.536363636	1099.805556	1449.076923	57.41666667	59.32653061	293.7735849	298.8148148	93.5584
5.672727273	1.081818182	1099.90625	1449.432432	60.59615385	62.5625	294.5185185	297.3653846	56.13504
9.75	2.65	1099.535714	1450.119048	58.2826087	59.30434783	289.0181818	292.1481481	96.4821
9.176470588	2.429411765	1099.586207	1449.209302	58.07843137	59.35714286	293.8846154	297.7647059	90.80668235
12.48	3.7	1099.97561	1449.333333	58	58.5	295.1730769	299.9615385	123.497088
13	3.9	1099.542857	1449.704545	56.12	58.05660377	294.8301887	298	128.6428
42.54545455	15.26363636	1099.285714	1450.170732	61.32	61.61538462	296.1636364	298.9622642	421.0128
10.63636364	2.990909091	1099.648649	1449.236842	60.25	61.73170732	297.3207547	301.9622642	105.2532
14.625	4.525	1099.710526	1448.794872	60.19047619	61.65789474	297.4814815	301.0185185	144.72315
14.625	4.525	1100.275862	1449.808511	61.13953488	62.275	298.0892857	301.9622642	144.72315
9.551020408	2.573469388	1099.361111	1449.275	60.76	61.18	295.8518519	299.0363636	94.51307755
10.75862069	3.037931034	1099.636364	1449.914286	59.83673469	61.13953488	298.7358491	299.962963	106.4630069
26	8.9	1099.875	1449.461538	60.25	62.53846154	294.0925926	298.1481481	257.2856
6.933333333	1.566666667	1099.676471	1450.97619	59.13953488	60.73684211	295.7678571	299.8545455	68.60949333
10.4	2.9	1099.4	1449.583333	61.66666667	61.64285714	294.7777778	299.9444444	102.91424
8.666666667	2.233333333	1099.451613	1449.421053	60.2	61.30769231	293.9814815	297.0357143	85.76186667
6.638297872	1.453191489	1099.216216	1449.465116	58.30612245	58.86956522	297.7407407	300.8	65.68994043
9.75	2.65	1099.266667	1449.166667	58.22727273	60.51428571	293.7192982	298.7857143	96.4821
12.48	3.7	1099.465116	1448.931818	59.47169811	60.28571429	298.7678571	303.1428571	123.497088
21.51724138	7.175862069	1099.815789	1450.076923	59.11111111	60.91111111	296.7454545	301.7272727	212.9260138
5.571428571	1.042857143	1099.333333	1449.5	59.5625	60.88636364	296.8846154	301.5192308	55.13262857
15.6	4.9	1099.333333	1449.088889	60.29268293	60.7027027	297.5660377	301.5660377	154.37136
16.86486486	5.386486486	1099.909091	1448.953488	60.57446809	61.88571429	294.9454545	300.6792453	166.8879568
11.14285714	3.185714286	1099.787234	1449.340909	58.14285714	59.81481481	294.9615385	300.1272727	110.2652571
12	3.515384615	1100.205128	1449.74359	58.33333333	60.64	299.5090909	301.7719298	118.7472
12	3.515384615	1099.058824	1449.589744	59.40909091	61.16666667	291.9090909	295.037037	118.7472
13	3.9	1099.605263	1448.325	58.15789474	59.68	295.0909091	297.7777778	128.6428
10.75862069	3.037931034	1099.638889	1448.904762	60.17777778	61.46666667	296.2	300.6296296	106.4630069
4	0.438461538	1100.073171	1448.97619	59.14893617	60.05555556	292.0961538	297.3703704	39.5824
8	1.976923077	1099.5	1448.717391	57.91111111	59.57142857	290.8703704	294.3773585	79.1648
7.609756098	1.826829268	1100.481481	1449.317073	60.34146341	62.39534884	292.5961538	296.4464286	75.30310244
24	8.130769231	1101.116279	1449.833333	60.46341463	62.09375	292.5	297.5740741	237.4944
8.666666667	2.233333333	1099.740741	1452.264706	60.62162162	62.71875	290.5714286	293.3090909	85.76186667
9.36	2.5	1099.96	1449.463415	59.56862745	61.4	291.3773585	294.5740741	92.622816
12	3.515384615	1099.206897	1450.307692	60.2	61.18604651	295.8928571	299.1818182	118.7472
312	118.9	1099.372093	1448.818182	59.98	59.97368421	301.8076923	304.82	3087.4272
15	4.669230769	1100.030303	1450.681818	61.19512195	62.20512821	294.3518519	298.7692308	148.434
6.782608696	1.508695652	1099.625	1448.477273	60.44186047	61.64864865	292.7407407	296.1818182	67.11798261
39	13.9	1100.041667	1447.957447	61.08333333	62.86486486	294.1964286	296.4339623	385.9284
9.551020408	2.573469388	1099.722222	1452.043478	59.18604651	61	294.3207547	297.1923077	94.51307755
11.41463415	3.290243902	1099.6	1450.666667	59.5	60.62857143	292.9622642	297.0566038	112.9546537
18.72	6.1	1099.043478	1449.611111	60.35555556	61.92105263	294.1929825	298.6909091	185.245632
31.2	10.9	1099.592593	1449.025	60.93181818	62	293.8490566	298.5272727	308.74272
31.2	10.9	1099.461538	1448.804878	58.7826087	59.64705882	291.9464286	295.6545455	308.74272
12.73469388	3.797959184	1099.674419	1449.530612	59.15	61.32432432	296.5294118	301.3269231	126.0174367
14.18181818	4.354545455	1099.634146	1450.131579	55.93478261	58	294.7592593	297.7407407	140.3376
27.52941176	9.488235294	1099.911111	1448.926829	60.95348837	62.81818182	296.5740741	300.2075472	272.4200471
22.28571429	7.471428571	1099.051282	1449.487805	56.85714286	58.71875	291.3272727	295.8703704	220.5305143
5.473684211	1.005263158	1099.777778	1449.04878	62	63.59259259	296.5714286	299.0192308	54.16538947
14.51162791	4.481395349	1098.777778	1450	61.88235294	63.68181818	291.6851852	295.0727273	143.6012651
31.2	10.9	1099.95122	1450.104167	61.75	63.46875	294.625	298.4814815	308.74272
39	13.9	1099.594595	1449.285714	61.55263158	63.32	292.1851852	295.537037	385.9284
14.18181818	4.354545455	1099.642857	1449.609756	62.43243243	63.74074074	303.6545455	308.7843137	140.3376
8.068965517	2.003448276	1098.942857	1448.777778	60.43478261	61.96	294.5272727	299.0909091	79.84725517
9.75	2.65	1099.35	1448.761905	61.2195122	63.03571429	295.9454545	299.6	96.4821
10.75862069	3.037931034	1099.540541	1448.891304	59.35897436	60.78787879	289.5	292.4339623	106.4630069
31.2	10.9	1099.5	1449.864865	58.63829787	60.37142857	292.8333333	296.8181818	308.74272
15.6	4.9	1099.540541	1449.232558	59.16216216	60.66666667	293.6071429	297.0526316	154.37136
15.6	4.9	1099.666667	1449.883721	60.75	61.7	291.1636364	294.8490566	154.37136
8	1.976923077	1099.55	1449.862745	61.1	63.03703704	293.1964286	296.1538462	79.1648
16.25	5.15	1099.210526	1451.2	61.86046512	63.60714286	295.0555556	299.0545455	160.8035
26	8.9	1099.482759	1448.625	62.09090909	63.65625	295.3148148	299.9444444	257.2856
22.28571429	7.471428571	1100.05	1448.692308	62.22916667	63.78787879	294.6111111	298.2678571	220.5305143
4.457142857	0.614285714	1099.583333	1450.652174	62	63.75	285.3333333	290.4423077	44.10610286
9.75	2.65	1099	1449.527778	61.02857143	62.07142857	294.9444444	299.1960784	96.4821
8.357142857	2.114285714	1099.12766	1449.232558	62.07317073	63.75	295.8888889	300.2181818	82.69894286
7.428571429	1.757142857	1100.098039	1448.25	62.18604651	63.75675676	294.6909091	299	73.51017143
10.4	2.9	1099.204545	1449.441176	62.10869565	63.9	295.6792453	300.1090909	102.91424
12	3.515384615	1099.883721	1448.555556	61.5952381	63.28205128	289.1698113	293.6851852	118.7472
15.09677419	4.706451613	1100.021277	1449.195652	56.08695652	57.97222222	294.2641509	298.5384615	149.3916387
17.82857143	5.757142857	1100.35	1449.022222	59.02380952	60.68965517	297.1666667	300.6545455	176.4244114
16.59574468	5.282978723	1099.425	1449.452381	62.4	64	299.0181818	303.5098039	164.2248511
8.068965517	2.003448276	1100.139535	1450.888889	61.78787879	63.52173913	297.6603774	300.7058824	79.84725517
14.71698113	4.560377358	1099.676471	1449.794872	59.97727273	61.46428571	297.5357143	300.4821429	145.6333585
15.91836735	5.02244898	1099.692308	1448.944444	61.92105263	63.63636364	291.8301887	295.9272727	157.5217959
12.48	3.7	1099.468085	1449.860465	61.975	63.79166667	297.9259259	300.9821429	123.497088
15.6	4.9	1099.868421	1450	62.04878049	63.96	294.9423077	298.6792453	154.37136
104	38.9	1099.771429	1449.411765	61.97674419	63.7826087	300.754717	305.6538462	1029.1424
10.63636364	2.990909091	1099.794118	1448.85	62	63.85185185	295.0769231	299.4528302	105.2532
14.18181818	4.354545455	1099.066667	1450	61.2	62.92307692	293.8113208	297.3571429	140.3376
6.5	1.4	1099.107143	1449.534884	62.15384615	63.71428571	294.4444444	298.7777778	64.3214
23.11111111	7.788888889	1098.947368	1449.606061	62.68421053	63.89285714	296.0588235	300.2075472	228.6983111
9.36	2.5	1100.510638	1448.826087	56.27659574	58.28571429	300.2666667	305.627451	92.622816
17.33333333	5.566666667	1099.969697	1448.813953	61.97435897	63.80645161	294.6181818	299.8076923	171.5237333
13.86666667	4.233333333	1099.722222	1449.26087	62.39534884	63.76666667	297.8909091	301.2857143	137.2189867
16.42105263	5.215789474	1099.5	1450.904762	58.52777778	59.63333333	297.0188679	299.9821429	162.4961684
4.333333333	0.566666667	1099.113636	1449.234043	55.97674419	57.82608696	295.7818182	299.0363636	42.88093333
9.176470588	2.429411765	1100.189189	1448.456522	55.13043478	57	293.3571429	296.0377358	90.80668235
17.33333333	5.566666667	1101.153846	1448.418605	61.31914894	62.86666667	294.4339623	297.2830189	171.5237333
9.75	2.65	1100.555556	1450.222222	56.52272727	58.06666667	291.5090909	295.3773585	96.4821
12	3.515384615	1098.638889	1453.277778	58.52272727	59.78947368	288.6964286	292.0178571	118.7472
3.627906977	0.295348837	1099	1447.820513	61.48837209	63.33333333	295.4464286	299.75	35.90031628
10.4	2.9	1099.102564	1448.184211	59.19512195	60.84848485	290.2909091	295.1320755	102.91424
9.75	2.65	1100.977273	1448.452381	59.18181818	60.85365854	291.462963	295.1636364	96.4821
6.782608696	1.508695652	1100.575758	1451.022727	61.55	63.25	295.1346154	299.5090909	67.11798261
6.638297872	1.453191489	211.3125	1134.270833	52.52272727	54.16666667	292.4909091	295.2	65.68994043
6.367346939	1.348979592	966.0227273	1447	56.86046512	58.11111111	292.0357143	296.2037037	63.00871837
7.8	1.9	1099.916667	1451.324324	62.21428571	63.36666667	296.4259259	299.2075472	77.18568
20.12903226	6.641935484	1099.47619	1448.615385	61.77083333	63.6	297.745098	300.9259259	199.1888516
16.42105263	5.215789474	1099.555556	1449.439024	62.43478261	64.03125	297.9814815	301.2075472	162.4961684
7.428571429	1.757142857	1098.903226	1449.395349	61.6	63.36	295.5090909	299.3773585	73.51017143
22.28571429	7.471428571	1099.08	1450.736842	62.09302326	63.72	293.0754717	294.8490566	220.5305143
52	18.9	1099.2	1448.809524	59.07317073	60.63636364	294.8181818	298.25	514.5712
26	8.9	1098.853659	1449.868421	59.06818182	60.82352941	289.5283019	293.1666667	257.2856
18.72	6.1	1099.666667	1448.470588	60.19565217	61.45454545	295.5357143	300.0740741	185.245632
52	18.9	1100.243243	1449.642857	57.25531915	58.84848485	295.8301887	298.7857143	514.5712
20.12903226	6.641935484	1099.594595	1450.069767	58.6744186	60.3030303	294.1538462	298.5849057	199.1888516
34.66666667	12.23333333	1099.735294	1449.692308	60.65217391	62.3	293.8301887	296.0816327	343.0474667
16.59574468	5.282978723	1100.24	1449.72973	61.45652174	63.19230769	295.2222222	299.2777778	164.2248511
28.36363636	9.809090909	1099.342105	1449.926829	60.64583333	61.89655172	291.5384615	295.7592593	280.6752
12.23529412	3.605882353	1098.891892	1449.74359	55.42857143	57.31818182	292.9215686	297.6909091	121.0755765
11.34545455	3.263636364	1099.289474	1448.428571	55.11904762	56.8	296.0925926	299.9259259	112.27008
13.56521739	4.117391304	1098.777778	1449.666667	54.86046512	56.74074074	295.1698113	298.9272727	134.2359652
13	3.9	1099.723404	1450.4	55.61904762	57.3	293.8269231	297.1851852	128.6428
20.8	6.9	1099.777778	1449.276596	55.71111111	57.41935484	292.1111111	296.1785714	205.82848
52	18.9	1099.945946	1450.190476	60.13333333	61.69444444	293.1666667	296.7592593	514.5712
15.6	4.9	1099.515152	1449.928571	58.82608696	60.93548387	290.2222222	292.5740741	154.37136
39	13.9	1099.466667	1448.785714	56.79545455	58.6	296.1320755	300.5818182	385.9284
19.5	6.4	1099.555556	1449.416667	62.72340426	64.18181818	292.3269231	297.8545455	192.9642
6.782608696	1.508695652	1100.033333	1449.575	51.62790698	52.76666667	295.2909091	299	67.11798261
11.14285714	3.185714286	1099.72093	1449	55.25531915	56.89285714	294.6181818	298.037037	110.2652571
6.782608696	1.508695652	1099.5	1450.097561	54.18181818	55.875	294.0545455	297.8148148	67.11798261
6.5	1.4	1099.15625	1449.5	56.93617021	58.71052632	291.962963	296.0192308	64.3214
22.28571429	7.471428571	1099.829787	1447.822222	57.76470588	59.26923077	294	298.4642857	220.5305143
6.5	1.4	1099.540541	1449.780488	56.6744186	58.54166667	296.3818182	299.6851852	64.3214
5.777777778	1.122222222	1099.833333	1448.875	55.89361702	57.66666667	295.6226415	299.0178571	57.17457778
4.727272727	0.718181818	1099.925	1449.275	56.82926829	58.37931034	295.8	298.7454545	46.7792
5.032258065	0.835483871	1100.030303	1450.210526	55.34782609	56.90322581	294.0754717	298.0576923	49.7972129
17.33333333	5.566666667	1099.84	1449.857143	54.3	56.03030303	297.1111111	300.1818182	171.5237333
5.571428571	1.042857143	1099.941176	1449.617647	57.5625	59.42857143	294.1636364	296.7017544	55.13262857
8.210526316	2.057894737	1099.516129	1449.766667	60.59090909	62.32352941	293.6730769	299.0377358	81.24808421
4	0.438461538	1099.290323	1449.209302	55.73584906	57.64705882	295.4444444	297.9818182	39.5824
8.666666667	2.233333333	1099.390244	1449.390244	56.20833333	57.47368421	295.037037	298.2222222	85.76186667
12.23529412	3.605882353	1099.705882	1449.175	58.02325581	59.87096774	294.462963	296.3636364	121.0755765
14.51162791	4.481395349	1099.342857	1449.142857	57.58	59.12903226	299.0961538	303.2592593	143.6012651
9.551020408	2.573469388	1099.52	1449.071429	54.30769231	58.06666667	291.9272727	294.2909091	94.51307755
8.666666667	2.233333333	1099.69697	1449.234043	57.875	58.39534884	297.4807692	301.6730769	85.76186667
7.090909091	1.627272727	1099.232558	1449.333333	57.47916667	59.10714286	301.0192308	305.8431373	70.1688
10.06451613	2.770967742	1100.571429	1448.619048	54.06976744	55.81818182	296.0892857	298.7678571	99.59442581
17.33333333	5.566666667	1099.897436	1452.552632	52.52631579	54.35294118	296.3773585	299.8888889	171.5237333
44.57142857	16.04285714	1100.28125	1447.9	51.18604651	52.65714286	295.9464286	300.3148148	441.0610286
36	12.74615385	1100.483871	1449.977778	55.86046512	56.53125	296.0545455	299.7169811	356.2416
13.86666667	4.233333333	1099.368421	1451.05	57	58.74074074	290.3090909	294.6111111	137.2189867
13.56521739	4.117391304	1099.583333	1449.472222	55.48717949	57.33333333	294.5714286	297.8928571	134.2359652
10.75862069	3.037931034	1098.875	1448.974359	54.7173913	56.5	292.0925926	296.2830189	106.4630069
8.210526316	2.057894737	1099.25	1449.323529	53.82926829	55.75757576	297.0185185	300.2222222	81.24808421
5.571428571	1.042857143	1099.463415	1449.638889	53.70731707	55.36363636	293.7192982	295.9636364	55.13262857
7.090909091	1.627272727	1099.368421	1448.390244	53.86842105	55.74193548	291.372549	294.8846154	70.1688
7.8	1.9	1099.375	1449.73913	60.80851064	61.4	290.2321429	293.3818182	77.18568
7.255813953	1.690697674	1099.289474	1449.162791	58.77083333	59.73913043	291.4259259	293.4528302	71.80063256
8.432432432	2.143243243	1098.681818	1448.75	60.68292683	62.16129032	292.3518519	295.4545455	83.44397838
7.428571429	1.757142857	1099.625	1448.851064	56.17307692	58.06122449	295.7678571	298.509434	73.51017143
10.63636364	2.990909091	1099.787879	1448.404255	57.5	60.02941176	294.82	298.4150943	105.2532
5.379310345	0.968965517	1099.944444	1451.078947	57.75609756	59.36842105	290.25	290.8867925	53.23150345
10.4	2.9	1099.375	1449.714286	55.86111111	57.48484848	283.1428571	285.3272727	102.91424
26	8.9	1100.15	1449	56.69767442	58.56666667	295.625	297.7777778	257.2856
3.391304348	0.204347826	1098.95	1449.5	56.9375	58.73333333	294.2857143	297.9285714	33.5589913
26	8.9	1099.411765	1449.853659	53.04761905	54.71428571	300.2	304.4313725	257.2856
22.28571429	7.471428571	1099.586207	1448.828571	52.55813953	54.65625	293.490566	297.9090909	220.5305143
10.4	2.9	1099.903226	1449.272727	50.87179487	52.56666667	294.962963	298.7142857	102.91424
15.6	4.9	1099.590909	1451.545455	45.48837209	47.4	288.6470588	291.1090909	154.37136
17.33333333	5.566666667	1099.333333	1449.969697	48.32432432	50.19444444	293.7678571	297.2407407	171.5237333
9.36	2.5	1099.423077	1449.432432	47.68292683	49.29032258	291.5714286	293.9444444	92.622816
11.14285714	3.185714286	1099.578947	1449.518519	43.04761905	44.96296296	290.0740741	293.5272727	110.2652571
22.94117647	7.723529412	1099.5	1449.868421	44.86111111	46.46428571	289.2692308	292.9259259	227.0167059
12.48	3.7	1099.307692	1449.116279	43.2	44.68	289.1132075	292.4814815	123.497088
17.33333333	5.566666667	1099.421053	1449.193548	43.80487805	45.63333333	293.4545455	297.3272727	171.5237333
26	8.9	1099.6875	1449.871795	39.66666667	41.59375	288.9454545	291.0181818	257.2856
31.2	10.9	1098.702703	1448.02381	39.16216216	40.79310345	293.7358491	295.4038462	308.74272
10.63636364	2.990909091	1098.972973	1448.3	39.62790698	41.41935484	291.3207547	294.3888889	105.2532
15.6	4.9	1099.545455	1448.522727	39.89473684	41.77777778	297.6481481	301.6666667	154.37136
39	13.9	1100.093023	1448.978723	37.375	39.22222222	296.0555556	298.8867925	385.9284
16.42105263	5.215789474	1099.974359	1449.555556	38.63636364	40.82142857	296.3962264	299.7037037	162.4961684
8.666666667	2.233333333	1099.914286	1449.045455	41.14285714	42.96666667	286	289.7454545	85.76186667
3.627906977	0.295348837	1098.575	1450.159091	41.61538462	43.32142857	292.3214286	295.1111111	35.90031628
11.14285714	3.185714286	1100.25641	1449.813953	44.54761905	46	290.1296296	294.8181818	110.2652571
9.75	2.65	1099.777778	1450.545455	44.1627907	46.03703704	295.8727273	298.8571429	96.4821
14.625	4.525	1099.609756	1449.547619	42.56097561	44.53333333	293.1111111	296.5576923	144.72315
2.689655172	-0.065517241	1099.65	1450.175	43.41463415	45.4	289.5961538	292.6727273	26.61575172
6.5	1.4	1099.833333	1448.833333	44.35714286	46.06896552	291.1153846	294.4	64.3214
16	5.053846154	1099.421053	1450.326087	46.90909091	49.20833333	292.4339623	296.3148148	158.3296
6.782608696	1.508695652	1099.657143	1449	54.34146341	56.03333333	296.3846154	300	67.11798261
19.5	6.4	1099.222222	1449.567568	55.60465116	57.12903226	294.8703704	298.4150943	192.9642
31.2	10.9	1099.675676	1449.4	52.52173913	54.32258065	296.2363636	297.8333333	308.74272
4	0.438461538	1099.809524	1449.84375	55.34090909	56.45714286	294.1578947	297.8245614	39.5824
17.33333333	5.566666667	1100.023256	1449.540541	56.37837838	58.46428571	295.2363636	298.4727273	171.5237333
16.42105263	5.215789474	1099.1	1449.65	52.10416667	53.8372093	297.1509434	299.2321429	162.4961684
26	8.9	1099.466667	1448.973684	51.74468085	53.58333333	295.625	299.8421053	257.2856
52	18.9	1099.595238	1448.674419	51.86666667	53.83783784	297.6	301.0714286	514.5712
20.8	6.9	1099.355556	1450.317073	50.41860465	52.59459459	295.3571429	298.1886792	205.82848
21.27272727	7.081818182	1099.352941	1449.363636	51.10526316	52.96666667	294.3392857	299.5	210.5064
14.85714286	4.614285714	1099.181818	1449.212766	51.47727273	53.65625	295.4310345	298	147.0203429
29.25	10.15	1099.326087	1448.095238	52.29545455	53.87096774	297.6363636	301.9090909	289.4463
22.28571429	7.471428571	1098.75	1448.795455	51.82222222	53.75609756	294.4210526	298.2857143	220.5305143
16.42105263	5.215789474	1100.205128	1450.022727	52.06521739	53.79411765	297.3518519	299.8333333	162.4961684
7.255813953	1.690697674	1099.348837	1451.333333	51.08888889	52.93939394	294.1052632	296.9272727	71.80063256
13.76470588	4.194117647	998.0238095	1450.244444	51.44444444	53.32258065	293.3859649	296.2777778	136.2100235
8.666666667	2.233333333	954.3333333	1450.755556	50.25531915	52.40740741	292.2545455	295.3076923	85.76186667
10.63636364	2.990909091	1092.948718	1451.695652	50.2195122	51.80555556	291.8103448	294.6545455	105.2532
26	8.9	1098.774194	1450.294118	50.60869565	52.54545455	289.7719298	293.75	257.2856
6	1.207692308	1099.138889	1447.766667	50.93478261	52.46428571	291.6071429	295	59.3736
7.255813953	1.690697674	1099.891892	1450.027027	51.20930233	53	298.0909091	300.3272727	71.80063256
17.33333333	5.566666667	1099.517241	1449.325	51.24444444	53.06896552	295.8070175	299.4561404	171.5237333
12	3.515384615	1099.83871	1449.340426	51.26190476	53.21428571	294.8947368	297.4210526	118.7472
18.57142857	6.042857143	1099.888889	1450.069767	50.51111111	51.83870968	287.6785714	291.8	183.7754286
14.85714286	4.614285714	1099.666667	1449.342857	51.35135135	53.30769231	296.6785714	299.8571429	147.0203429
12.48	3.7	1099.724138	1451.027778	50.92156863	52.96296296	294.5087719	298.8148148	123.497088
31.2	10.9	1099.454545	1448.636364	51.04761905	52.6969697	291.2857143	294.0357143	308.74272
14.18181818	4.354545455	1099.47619	1450.108108	50.78571429	52.46428571	292.9655172	296.2105263	140.3376
18.13953488	5.876744186	1099.516129	1449.235294	50.88372093	53.03571429	297.125	299.1636364	179.5015814
13.76470588	4.194117647	1099.478261	1450.34375	51.09302326	53	299.6862745	303.6315789	136.2100235
28.88888889	10.01111111	1099.32	1449.235294	50.93333333	52.53333333	292.75	296.037037	285.8728889
44.57142857	16.04285714	1099.451613	1449.53125	50.91891892	52.52777778	294.7678571	297.375	441.0610286
13.37142857	4.042857143	1099.473684	1448.925	50	51.90243902	292.1551724	295.245614	132.3183086
31.2	10.9	1099.4375	1449.175	50.82978723	52.32258065	293.2222222	297.1851852	308.74272
7.090909091	1.627272727	1099.05	1449.02381	48.11363636	49.76923077	297.3571429	301.7192982	70.1688
17.33333333	5.566666667	1099.581395	1448.642857	47.90697674	49.82857143	299.5555556	302.9230769	171.5237333
12.48	3.7	1098.785714	1449.777778	51.41666667	53.1	292.7192982	296.9824561	123.497088
12.48	3.7	1099.847826	1449.543478	51.06666667	52.52941176	292.3508772	295.0181818	123.497088
3.319148936	0.176595745	1099.891304	1448.952381	51.31111111	53.35294118	296.862069	300.2962963	32.84497021
17.33333333	5.566666667	1098.666667	1449.74359	51.60416667	52.97142857	291.7368421	295.5090909	171.5237333
8.830188679	2.296226415	1098.818182	1448.025	50.45238095	52.25	293.7931034	296.9636364	87.38001509
39	13.9	1100.302326	1449.204545	50.11627907	51.76470588	294.9482759	298.8275862	385.9284
17.33333333	5.566666667	1100.119048	1448.638298	51.79166667	53.43243243	296.2545455	299.2545455	171.5237333
20.8	6.9	1100.025641	1448.925	51.61702128	53.44	293.7636364	297.1785714	205.82848
13.76470588	4.194117647	1099.666667	1449.4	51.5	52.70967742	296.7586207	300.4912281	136.2100235
9.75	2.65	1099	1449.521739	51.65306122	53.43333333	293.8947368	296.9642857	96.4821
52	18.9	1098.382979	1450.425532	50.14893617	52.26923077	292.0689655	294.8070175	514.5712
17.33333333	5.566666667	1100.061224	1448.95122	51.1875	52.83783784	294.4363636	295.9215686	171.5237333
9.454545455	2.536363636	1100.489362	1448.113636	51.68888889	53.52631579	293.4716981	296.4038462	93.5584
4	0.438461538	1099.357143	1450.026316	51.67346939	53.5	294.8490566	298.5740741	39.5824
15.6	4.9	1099.604651	1450	50.52	52.54285714	296.754386	299.4259259	154.37136
22.28571429	7.471428571	1099.555556	1448.564103	51.21428571	53.13333333	293.1607143	295.122807	220.5305143
11.55555556	3.344444444	1099	1449.636364	51.75555556	53.47222222	301.8113208	306.6296296	114.3491556
29.25	10.15	1098.979167	1448.761905	51.90243902	53.58064516	302.8727273	307.5882353	289.4463
11.14285714	3.185714286	1098.568627	1450.125	51.92682927	53.5483871	297.4901961	302.1372549	110.2652571
10.17391304	2.813043478	1100	1448.742857	52.09756098	53.29032258	295	296.9827586	100.6769739
15.6	4.9	1100.288889	1449.088889	51.7826087	53.45454545	297.6428571	300.8392857	154.37136
9.75	2.65	1100.125	1448.931818	51.87234043	53.52777778	294.4727273	295.9298246	96.4821
14.51162791	4.481395349	1100.538462	1449.061224	51.75	53.75757576	296.1111111	300.2068966	143.6012651
8.914285714	2.328571429	1100.527778	1448.976744	51.88372093	53.63888889	296.7962963	299.4035088	88.21220571
8.666666667	2.233333333	1099.065217	1453.358974	51.52380952	53.09090909	293.962963	296.4727273	85.76186667
7.609756098	1.826829268	1099.627907	1449.2	51.31372549	53.5	299.8363636	303.3272727	75.30310244
9.551020408	2.573469388	1099.189189	1448.756098	52.02272727	53.46153846	297.6071429	300.9272727	94.51307755
10.88372093	3.086046512	1099.418605	1449.04878	51.77272727	53.51351351	290.1071429	292.372549	107.7009488
14.85714286	4.614285714	1099.767442	1449.285714	51.69767442	53.78125	307.745098	312.0566038	147.0203429
7.609756098	1.826829268	1100.291667	1449.236842	51.76595745	53.72972973	295.7719298	300.7142857	75.30310244
13.86666667	4.233333333	1100.487805	1448.76087	51.70454545	53.65714286	294.245283	299.6538462	137.2189867
12.48	3.7	1100.02439	1448.522727	52.06122449	53.59375	297.2363636	300.537037	123.497088
12.73469388	3.797959184	1098.575	1452.041667	52	53.7027027	299.6785714	303.4912281	126.0174367
9.957446809	2.729787234	1098.454545	1449.046512	51.86666667	53.82352941	304.25	307.2545455	98.53491064
4.333333333	0.566666667	1100.340909	1448.904762	51.06976744	53.32258065	300.4528302	304.3636364	42.88093333
13.37142857	4.042857143	1100.525	1448.458333	51.14285714	52.74285714	292.5818182	295.0357143	132.3183086
8.210526316	2.057894737	990.4666667	1450	51.64583333	53.64516129	295.3703704	298.122807	81.24808421
26	8.9	1080.275	1451.658537	52	53.45454545	293.4912281	298.3148148	257.2856
17.33333333	5.566666667	1099.108108	1447.885714	51.44444444	53.13888889	295.0566038	300.2586207	171.5237333
26	8.9	1099.682927	1448.325	51.18604651	52.88235294	297.9298246	300.7894737	257.2856
13	3.9	1100.025641	1448.511111	51.60465116	53.67567568	293.0877193	296.3214286	128.6428
24	8.130769231	1099.384615	1449.8	50.77272727	53.05405405	293.625	294.637931	237.4944
6.933333333	1.566666667	939.9555556	1450.826087	50.1875	52.26829268	295.4561404	297.8214286	68.60949333
22.28571429	7.471428571	1100.128205	1449.564103	51.45454545	53	296.3684211	299.6724138	220.5305143
8.666666667	2.233333333	1099.448276	1448.542857	52	53.64516129	298.745098	302.0377358	85.76186667
15.6	4.9	1099.764706	1449.972222	51.51219512	53.02631579	288.1428571	291.9464286	154.37136
3.714285714	0.328571429	1099.038462	1449.447368	49.61363636	51.35294118	293.1636364	298.3965517	36.75508571
12	3.515384615	1100	1449.075	51.23255814	52.97674419	293.137931	296.5438596	118.7472
31.2	10.9	1099.730769	1449.372093	51.47916667	53.30555556	296.1785714	300.2321429	308.74272
12.64864865	3.764864865	1099.875	1449.613636	51.95833333	53.66666667	290.6724138	294.7894737	125.1659676
17.33333333	5.566666667	1099.583333	1451.965517	50.86666667	52.65625	292.0344828	295.2586207	171.5237333
12	3.515384615	1099.363636	1449.058824	51.60416667	53.47368421	295.0178571	297.9642857	118.7472
39	13.9	1099.37037	1450.138889	51.5625	53.05882353	290.75	293.2280702	385.9284
23.11111111	7.788888889	1099.642857	1448.511628	51.77083333	53.24242424	294.1636364	296.8545455	228.6983111
23.4	7.9	1099	1448.710526	51.17777778	52.58974359	294.5614035	299.3818182	231.55704
17.33333333	5.566666667	1099.578947	1447.926829	51.13043478	52.84375	292.0178571	294.9137931	171.5237333
18.72	6.1	1100.133333	1449.35	51.63265306	53.46511628	294.4035088	297.4821429	185.245632
78	28.9	1100.648649	1449.227273	52.06521739	53.72222222	293.2931034	296.2280702	771.8568
39	13.9	1099.65	1449.25	51	52.29032258	292.9107143	297.0909091	385.9284
10.63636364	2.990909091	1100.575	1449.95122	50.46666667	52.09090909	294.6140351	298.2631579	105.2532
39	13.9	1099.521739	1450.24	49.18181818	50.72222222	296.125	299.5263158	385.9284
6.782608696	1.508695652	1099.5	1450	50.75555556	52.51282051	295.2586207	300.1403509	67.11798261
11.55555556	3.344444444	1099.5	1449.37931	51.76744186	53.58823529	295.4561404	296.6315789	114.3491556
19.5	6.4	1099.347826	1449.516129	50.35416667	51.87096774	291.7894737	296.7090909	192.9642
21.27272727	7.081818182	1097.9	1449.366667	50.26923077	52	296.0535714	301.0363636	210.5064
17.33333333	5.566666667	1098.863636	1447.828571	50.83333333	53.19444444	295.5178571	299.125	171.5237333
31.2	10.9	1099.487179	1448.707317	51.77777778	53.87878788	295.3333333	299.9814815	308.74272
19.5	6.4	1100.533333	1448.883721	49.825	51.63157895	291.8392857	296.9824561	192.9642
23.4	7.9	1099.173913	1452.111111	51.41860465	53.34285714	293.8679245	297.2280702	231.55704
9.75	2.65	1100.104167	1448.454545	51.83673469	53.625	293.877193	296.8909091	96.4821
22.28571429	7.471428571	1100.380952	1449.311111	51.83333333	53.37142857	295.0909091	298.3818182	220.5305143
39	13.9	1099.818182	1450.833333	52.225	53.97297297	293.375	298.6607143	385.9284
5.886792453	1.164150943	1099.446809	1449.975	48.42222222	50.28125	299.1607143	303	58.2533434
10.88372093	3.086046512	1099.901961	1448.97561	48.88888889	50.43243243	293.962963	297.5789474	107.7009488
8.666666667	2.233333333	1100	1449.658537	48.51111111	50.17142857	293.1929825	297.6037736	85.76186667
6.24	1.3	1100.145833	1450.051282	49.80487805	51.39393939	297.9285714	302.4909091	61.748544
13	3.9	1099.926829	1449.380952	48.41860465	50.13333333	296.5614035	300.4909091	128.6428
13.76470588	4.194117647	1100	1450.485714	48.33333333	50.11111111	300.7192982	305.1428571	136.2100235
14.18181818	4.354545455	1099.607143	1449.861111	48.24444444	50.25	292.4444444	296.1607143	140.3376
8.210526316	2.057894737	1099.451613	1449.486486	48.31578947	49.74285714	296.8653846	299.1851852	81.24808421
8.432432432	2.143243243	1099.551724	1449.096774	50.60416667	52.71428571	293.3636364	297.5961538	83.44397838
7.8	1.9	1099.035714	1450.514286	51.42	53.41176471	296.375	300.5454545	77.18568
19.5	6.4	1099.222222	1448.967742	51.73809524	53.29032258	293.7272727	297.1034483	192.9642
20.8	6.9	1098.974359	1448.833333	52.17073171	53.93103448	294.9649123	298.1132075	205.82848
25.16129032	8.577419355	1099.577778	1449.189189	52.02173913	53.91428571	294.0175439	297.9811321	248.9860645
10.4	2.9	1099.181818	1449.285714	51.70212766	53.53846154	292.3392857	295.7931034	102.91424
7.090909091	1.627272727	1099.710526	1449.404762	51.4047619	53.09375	295.5614035	298.8703704	70.1688
8.666666667	2.233333333	1099.782609	1449.173913	50.31914894	51.89189189	293.6666667	296.7068966	85.76186667
24.63157895	8.373684211	1099.658537	1449.594595	52.38461538	53.91176471	294.2678571	297.6545455	243.7442526
20.8	6.9	1100.315789	1448.888889	51.19565217	53.25714286	295.8148148	298.6363636	205.82848
15.6	4.9	1098.888889	1451.95122	51.14634146	52.74358974	293.1206897	297.1818182	154.37136
7.428571429	1.757142857	1099	1449.195122	50.95652174	53.04878049	290.9272727	294.4642857	73.51017143
26	8.9	1099.243902	1447.146341	51.25531915	53.02857143	295.5	299	257.2856
10.88372093	3.086046512	931.8636364	1450.478261	50.91111111	52.36111111	289.8888889	293.6181818	107.7009488
15.2195122	4.753658537	904.5111111	1448.052632	50.76086957	52.75	293.6415094	298.4615385	150.6062049
7.8	1.9	881.5675676	1451.547619	51.05263158	52.5	294.3684211	298.0185185	77.18568
3	0.053846154	914.6756757	1451.659091	49.75555556	52.05882353	294.5454545	297.6964286	29.6868
2.888888889	0.011111111	1099.666667	1446.540541	49.45833333	51.20588235	292.2264151	296.3090909	28.58728889
19.5	6.4	1099.433333	1449.931818	49.19512195	51.08571429	297.1929825	300.0517241	192.9642
6.24	1.3	1099.571429	1448.75	50.36956522	52.26666667	289.0535714	293.6727273	61.748544
18.90909091	6.172727273	1099.888889	1449.363636	49.46511628	51.42424242	294.75	299.1071429	187.1168
39	13.9	399.4722222	1449.454545	59.23913043	61	300.6315789	305.8148148	385.9284
18	5.823076923	399.4736842	1449.515152	59	60.91666667	292.0566038	295.6607143	178.1208
13	3.9	400.0526316	1449.65625	56.0212766	57.66666667	289.9272727	293	128.6428
15.6	4.9	399.8809524	1449.384615	55.02325581	56.78378378	294.5283019	297.6666667	154.37136
34.66666667	12.23333333	399.787234	1449.257143	58.40909091	60.375	294.6428571	297.4035088	343.0474667
16.42105263	5.215789474	400.0930233	1450.085714	58.42	60.24242424	295.5178571	299.1929825	162.4961684
7.8	1.9	399.5555556	1449.028571	59.18918919	61	292.462963	297.9245283	77.18568
9.75	2.65	399.5882353	1449.315789	59.38095238	61.02702703	295.6896552	299.1071429	96.4821
11.14285714	3.185714286	399.4571429	1449.828571	58.67346939	60.53571429	293.2678571	296.9824561	110.2652571
15.6	4.9	592.1702128	1448.888889	59.35555556	61.08823529	292.6034483	296.6896552	154.37136
18	5.823076923	1099.485714	1447.388889	59.36363636	60.94736842	298.462963	302.3571429	178.1208
26	8.9	1099.878049	1449.785714	59.45454545	60.88235294	298.7636364	302.3793103	257.2856
58.5	21.4	1099.463415	1451.230769	57.52272727	59.05405405	291.8214286	296.2181818	578.8926
2.888888889	0.011111111	1099.764706	1448.409091	56.88461538	58.67857143	293.0877193	297.6842105	28.58728889
19.10204082	6.246938776	1099.65625	1450.342105	57.14285714	58.96774194	295.6727273	299.4545455	189.0261551
19.5	6.4	1099.358974	1449.025	57.34042553	58.96	288.2321429	291.3962264	192.9642
13.56521739	4.117391304	1099.107143	1449.973684	57.14285714	58.875	295	296	134.2359652
13.56521739	4.117391304	1098.694444	1448.558824	56.58139535	58.39534884	292.5090909	296.0357143	134.2359652
12	3.515384615	1099.45	1448.971429	56.90566038	58.67567568	292.7931034	295.862069	118.7472
9.454545455	2.536363636	1099.631579	1449.282051	57.2826087	58.9375	294.5636364	298.4285714	93.5584
10.4	2.9	1099.463415	1450.162162	57.27272727	58.93939394	295.2982456	299.1964286	102.91424
4.216216216	0.521621622	1099.948718	1448.731707	55.92592593	58.05714286	293.6071429	296.8392857	41.72198919
3.627906977	0.295348837	1099.547619	1449.461538	56.08888889	58.03333333	294	297.8392857	35.90031628
31.2	10.9	1099.222222	1448.512195	57.9	59.86206897	294.8214286	299.1206897	308.74272
36	12.74615385	1099.555556	1449.630435	55.12765957	56.75757576	295.6111111	300.122807	356.2416
22.28571429	7.471428571	1099.5	1450.809524	55.06	56.69444444	290.3965517	293.7962963	220.5305143
7.609756098	1.826829268	1099.022727	1450.615385	54.36363636	56.4375	295.8	298.5	75.30310244
14.18181818	4.354545455	1099.97619	1450.46875	55.33333333	57.41666667	293.5178571	297.2909091	140.3376
9.36	2.5	1099.617647	1449.222222	58.02631579	59.94285714	295.8928571	299.1818182	92.622816
7.609756098	1.826829268	1099.363636	1450.892857	58.12195122	60.26470588	295.5	299.6428571	75.30310244
8	1.976923077	1099.318182	1449.034483	59.28888889	60.73913043	293.2280702	297.0363636	79.1648
156	58.9	1099.708333	1448.545455	59.88095238	61.26923077	301.4423077	304.9259259	1543.7136
7.428571429	1.757142857	1099.265306	1449.794118	59.05	60.8	296.3333333	299.7454545	73.51017143
8.210526316	2.057894737	1100.204082	1449.071429	58.89795918	60.83333333	291.9482759	296.3818182	81.24808421
26	8.9	1100.195652	1449.139535	59.68888889	61.5	289.8571429	293.2807018	257.2856
8.914285714	2.328571429	1099.774194	1449.457143	59.14583333	61.34615385	292.3103448	297.7636364	88.21220571
78	28.9	1099.342857	1450.235294	59.83333333	61.44	292.1071429	295.5555556	771.8568
8.509090909	2.172727273	1099.55	1450.384615	60	61.25925926	291.5818182	295.3928571	84.20256
10.06451613	2.770967742	1099.177778	1449.030303	58.38636364	60.03125	293.3275862	295.8823529	99.59442581
5.379310345	0.968965517	1099.179487	1449.302326	59.24444444	60.66666667	292.7894737	295.5087719	53.23150345
13.56521739	4.117391304	1099.222222	1449.727273	59.91489362	61.46875	292.1578947	295.8421053	134.2359652
10.75862069	3.037931034	1099.829268	1449.485714	58.91891892	60.8	293.0769231	297.2	106.4630069
17.72727273	5.718181818	1099.666667	1448.833333	59.91666667	61.28947368	299.037037	303.7678571	175.422
20.8	6.9	1100.081081	1449.133333	60.04545455	61.35	294.25	298.6346154	205.82848
13	3.9	1099.568182	1450.534884	59.88372093	61.41935484	296.2363636	299.0357143	128.6428
31.2	10.9	1099.644444	1448.636364	59.75	61.34146341	292.6296296	296.8518519	308.74272
15.09677419	4.706451613	1099.347826	1449.8	59.48837209	61.26666667	296.1607143	299.6727273	149.3916387
3.627906977	0.295348837	1100.717949	1449.175	59.06818182	60.65	291.0714286	295.5614035	35.90031628
12.23529412	3.605882353	1100	1446.95122	60.02439024	61.51515152	293.7678571	297.8035714	121.0755765
18.35294118	5.958823529	1100.512821	1447.733333	59.57692308	61.2	293.7719298	297.8909091	181.6133647
9.551020408	2.573469388	1099.72	1449.170732	59.61363636	61.39393939	292.0943396	297.0181818	94.51307755
9.176470588	2.429411765	1100.410256	1448.794872	59.63636364	61.25714286	296.4107143	297.4727273	90.80668235
15.09677419	4.706451613	1100.333333	1448.477273	59.63043478	61.45945946	289.4912281	293.3636364	149.3916387
12.23529412	3.605882353	1099.142857	1449.969697	58.58536585	60.23076923	290.8596491	293.3859649	121.0755765
8	1.976923077	1098.870968	1447.857143	59.10416667	60.88888889	291.1785714	294.6603774	79.1648
6.24	1.3	1100	1447.868421	57.53658537	59.15625	291.9272727	295.6792453	61.748544
13	3.9	1099	1450.777778	56.97916667	59	289.1206897	292.9272727	128.6428
10.4	2.9	1099.685714	1449.543478	59.1025641	60.51428571	291.3965517	294.2807018	102.91424
13	3.9	1098.153846	1449.902439	58.28205128	59.6	290.3272727	294.1481481	128.6428
20.8	6.9	1099.558824	1449.217391	59.7	61.48148148	293.6315789	297.6363636	205.82848
9	2.361538462	1099.769231	1450.658537	59.65306122	61.48571429	290.3454545	294.2105263	89.0604
13.56521739	4.117391304	1099.857143	1449.230769	60.06	61.44117647	294	298.0689655	134.2359652
22.94117647	7.723529412	1099.5	1449.55	59.93023256	61.55882353	295.8947368	298.0892857	227.0167059
7.609756098	1.826829268	1099.652174	1449.361111	58.75	60.06451613	294.0188679	298.3157895	75.30310244
39	13.9	1099.931034	1448.387097	59.04651163	61.07142857	289.6481481	293.5357143	385.9284
7.609756098	1.826829268	1099.333333	1450.382353	59.19565217	61.25	298.8035714	304.6666667	75.30310244
20.8	6.9	1099.56	1450	59.91489362	61.57142857	296.5555556	300.9818182	205.82848
46.8	16.9	1099.59375	1448.21875	60.04166667	61.47222222	294.3888889	298.8679245	463.11408
19.5	6.4	1099.628571	1451.095238	59.45238095	61.21621622	298.0517241	302.3207547	192.9642
12.48	3.7	1099.5	1449.580645	59.89361702	61.18181818	297.8727273	301.0892857	123.497088
15.91836735	5.02244898	1098.4	1448.025641	59.6875	61.4	295.462963	300.3454545	157.5217959
52	18.9	1098.641026	1448.594595	58.90697674	60.48387097	297.8333333	303.1153846	514.5712
44.57142857	16.04285714	1100.651163	1449.157895	57.16666667	59	294.3584906	299.5660377	441.0610286
14.18181818	4.354545455	1100.129032	1449.512195	57.35	58.87096774	296.0576923	301.1698113	140.3376
3.9	0.4	1099.055556	1449.210526	56.86666667	58.52941176	294.9482759	297.5090909	38.59284
52	18.9	1100.586207	1450.341463	57.56521739	59.2	288.5	291.6666667	514.5712
9.75	2.65	1100.083333	1450.780488	57.34	59.12903226	292.2909091	297.4285714	96.4821
19.5	6.4	1099.314286	1450.764706	53.84782609	55.35897436	289.7368421	292.8392857	192.9642
16.42105263	5.215789474	1099.35	1449.515152	57.7173913	59.10714286	293.4561404	298.0185185	162.4961684
13.56521739	4.117391304	1098.95122	1449.28125	56.51111111	58.5625	295.7407407	300.0384615	134.2359652
5.379310345	0.968965517	1099.380952	1449.526316	54.38	56.90909091	298.2884615	301.5882353	53.23150345
18.35294118	5.958823529	1099.195652	1449.5	57.45652174	59.20689655	294.0175439	297.9636364	181.6133647
8.068965517	2.003448276	1099.266667	1448.902439	59.53658537	60.93548387	295.6666667	301.1296296	79.84725517
16.13793103	5.106896552	1099.658537	1449.923077	59.97727273	61.35294118	294.0714286	297.8703704	159.6945103
21.08108108	7.008108108	1099.55814	1448.636364	57.40425532	59.51612903	296.0714286	300.2363636	208.6099459
15.6	4.9	1100.170732	1449.324324	54.70454545	56.44	293.3090909	296.7272727	154.37136
11.55555556	3.344444444	1099.647059	1450.333333	54.90909091	56.56666667	293.3703704	296.7454545	114.3491556
12.48	3.7	1099.552632	1449.651163	55.59090909	57.10344828	294.0526316	298.3090909	123.497088
6	1.207692308	1099.458333	1448.848485	57.06976744	58.97058824	296.1754386	298.4035088	59.3736
12	3.515384615	1099.795918	1449.842105	55.48837209	57.78378378	294.0178571	297.2068966	118.7472
13.27659574	4.006382979	1099.777778	1449.288889	58.95555556	60.7037037	291.7169811	296.0545455	131.3798809
33.42857143	11.75714286	1100.162791	1449.842105	58.93478261	60.57142857	292.7192982	295.3018868	330.7957714
18.13953488	5.876744186	1099.34375	1450.25	59.05555556	60.68965517	296.3965517	297.7857143	179.5015814
10.4	2.9	1099.97561	1449.30303	58.85106383	60.875	294.5818182	297.7692308	102.91424
31.2	10.9	1099.583333	1448.594595	57.86046512	59.91428571	287.7636364	292.0714286	308.74272
16.42105263	5.215789474	1099.5	1450.53125	58.82608696	60.625	291.537037	295.3333333	162.4961684
3.9	0.4	1100	1449.076923	58.36170213	60.4516129	296.5272727	299.9444444	38.59284
11.14285714	3.185714286	1099.617647	1448.297872	59.17391304	60.625	289.2321429	292.0943396	110.2652571
20.8	6.9	1099.484848	1450.365854	58.52272727	60.53333333	293.9090909	298.1428571	205.82848
7.8	1.9	1099.815789	1449.921053	58.60869565	60.2962963	291.3333333	296.9464286	77.18568
12	3.515384615	1099.333333	1447.682927	58.55555556	60.21428571	290.1607143	294.9649123	118.7472
3.12	0.1	1099.560976	1449.27907	59.02173913	60.86666667	293.1851852	296.2631579	30.874272
78	28.9	1099.4	1449.393939	59	60.875	295.8928571	299.5263158	771.8568
52	18.9	1099.222222	1449.452381	59.08510638	60.81818182	297.5789474	301.3035714	514.5712
4.105263158	0.478947368	1100.044444	1449.055556	58.95833333	60.81081081	293.4259259	297.38	40.62404211
11.41463415	3.290243902	1099.6	1452.102564	58.5625	60.2	291.5535714	295.3571429	112.9546537
34.66666667	12.23333333	1099.257143	1449.558824	57.74358974	60.11111111	295.1454545	298.0784314	343.0474667
12.64864865	3.764864865	1098.860465	1449.605263	54.35416667	56.12903226	292.754386	297.122807	125.1659676
12.73469388	3.797959184	1099.431818	1449.516129	55.56862745	57	293.5384615	298.3035714	126.0174367
14.85714286	4.614285714	1099.5	1449.375	58.37777778	60.35714286	293.2545455	296.5555556	147.0203429
39	13.9	1100.611111	1449.666667	59.08108108	60.77777778	298.125	302.7321429	385.9284
8.357142857	2.114285714	1099.216216	1450.225	58.64444444	60.48648649	292.7894737	296.3928571	82.69894286
6.24	1.3	1099.0625	1448.083333	58.83333333	60.80769231	292.1785714	296.1607143	61.748544
6.933333333	1.566666667	1098.871795	1446.97561	58.65116279	60.71428571	292.6792453	295.754386	68.60949333
14.85714286	4.614285714	1100	1449.061224	58	60	291.1886792	295.4259259	147.0203429
8.210526316	2.057894737	1100.243902	1448.659574	57.82222222	59.70967742	295.1090909	298.4821429	81.24808421
10.75862069	3.037931034	1028.75	1451.095238	58.85416667	60.82352941	294.2	298.2727273	106.4630069
8.830188679	2.296226415	1099.851852	1448.190476	56.70454545	58.26470588	289.4181818	294.0344828	87.38001509
16.42105263	5.215789474	1099.883721	1448.583333	56.81632653	58.42857143	288.7894737	292.7413793	162.4961684
12	3.515384615	1099.607143	1448.72973	60.13953488	61.97058824	293.75	298.8545455	118.7472
12.23529412	3.605882353	1099.794118	1449.866667	60.775	62.84848485	294.9642857	300.4150943	121.0755765
12	3.515384615	1099.285714	1448.815789	60.71111111	62.46875	293.8421053	298.5636364	118.7472
13.44827586	4.072413793	1100.107143	1449.181818	61.31707317	62.74193548	291.8301887	296.9454545	133.0787586
9.551020408	2.573469388	1099.354839	1450.564103	61.75510204	63.78787879	297.2181818	301.8421053	94.51307755
11.77358491	3.428301887	1099.714286	1449.864865	62.1	63.72413793	296.8518519	301.4814815	116.5066868
17.33333333	5.566666667	1099.565217	1449.84375	61.18604651	62.61111111	291.5272727	296.4444444	171.5237333
9.551020408	2.573469388	1099.8	1448.517241	61.5	63.21875	292.7454545	296.3518519	94.51307755
3.058823529	0.076470588	1099.315789	1448.153846	61.02272727	63.03333333	292.5185185	297.4821429	30.26889412
12.31578947	3.636842105	1099.486486	1448.78125	59.59090909	61.19230769	295.8392857	298.9814815	121.8721263
39	13.9	1099.657895	1449.65625	59.60465116	61.39393939	294.3035714	297.8070175	385.9284
18.35294118	5.958823529	1100.0625	1449.210526	59.41860465	61.38461538	291.2037037	295.0754717	181.6133647
34.66666667	12.23333333	1099.392857	1450.166667	59.39130435	61.15625	296.4545455	300	343.0474667
26	8.9	1100.121212	1449	59.76315789	61.25	296.5925926	300.490566	257.2856
62.4	22.9	1099.451613	1448.969697	61.56862745	63.11764706	295.7454545	298.7142857	617.48544
8.830188679	2.296226415	1099.933333	1449.5	56.68181818	58.18181818	293.754386	298.6037736	87.38001509
31.2	10.9	1099.842105	1450.405405	57.04	59.11538462	294.0357143	298.2142857	308.74272
12.48	3.7	1099.558824	1450.033333	57.36585366	59.28571429	292.0545455	294.7857143	123.497088
6.782608696	1.508695652	1099.527778	1449.666667	58.53333333	60.46875	292.7222222	295.5454545	67.11798261
9.176470588	2.429411765	1099.461538	1449.282051	59.31818182	61.66666667	293.9272727	297.3928571	90.80668235
4.105263158	0.478947368	1099.117647	1449.756757	61.68085106	63.29545455	292.0181818	295.7454545	40.62404211
31.2	10.9	1099.709677	1449.439024	61.30612245	62.84	294.4310345	297.3392857	308.74272
12	3.515384615	1099.244898	1449.25	61.47619048	63.61290323	290.625	294.7636364	118.7472
8.210526316	2.057894737	1099.108108	1449.451613	59.13333333	60.84615385	294.1886792	297.3571429	81.24808421
8.432432432	2.143243243	1098.977778	1449.75	61.85365854	63.39285714	293.4035088	299.0517241	83.44397838
24	8.130769231	1099.511111	1449.193548	62.26086957	64.08	292.0689655	294.9824561	237.4944
52	18.9	1099.794872	1449.179487	62.08510638	64.05714286	289.7192982	294.3275862	514.5712
16	5.053846154	1099.604651	1449.205882	62.025	63.74285714	290.962963	294.3333333	158.3296
6.782608696	1.508695652	1099.688889	1449.857143	61.90697674	63.57575758	289.1071429	292.4642857	67.11798261
7.255813953	1.690697674	1099.452381	1449.62069	62.34883721	63.61290323	291.8245614	295.3214286	71.80063256
26	8.9	1099.938776	1449.026316	62.625	64.20689655	299.5849057	303.2909091	257.2856
11.14285714	3.185714286	1100.257143	1449.484848	62.48888889	64.2	292.8392857	296.2631579	110.2652571
23.4	7.9	1099.479167	1450.2	62.13513514	64.13793103	294.7142857	300.4074074	231.55704
24.63157895	8.373684211	1099.6	1450.15625	62.48888889	64.16666667	297.1090909	301.1851852	243.7442526
4.105263158	0.478947368	1099.642857	1448.868421	62.19230769	64.18518519	291.0526316	294.5098039	40.62404211
16.71428571	5.328571429	1100.069767	1449.564103	62.71428571	64.13333333	292.1272727	295.4655172	165.3978857
9.75	2.65	1099.6875	1448.97561	61.36170213	62.82857143	291.2857143	294.9655172	96.4821
18.13953488	5.876744186	1099.769231	1450.310345	62.45454545	64.2972973	295.7017544	300.9285714	179.5015814
17.33333333	5.566666667	1099.512195	1449.842105	62.6097561	64.12903226	289.7586207	293.9090909	171.5237333
156	58.9	1099.088235	1449.628571	62.6	64.30769231	296.6226415	303.0754717	1543.7136
6.24	1.3	1099.948718	1448.029412	61.69767442	63.26923077	291.0363636	294.4444444	61.748544
11.55555556	3.344444444	1099.2	1449.657143	62.57142857	64.24242424	295.6071429	300.3518519	114.3491556
9.176470588	2.429411765	1098.926829	1449.342105	61.30952381	62.41666667	291.9464286	295	90.80668235
13.76470588	4.194117647	1099.282051	1449.078947	62.16326531	63.82352941	292.7586207	295.9482759	136.2100235
26	8.9	1100.108108	1449.473684	60.92682927	62.89655172	293.5636364	295.8571429	257.2856
4	0.438461538	1099.741935	1448.368421	62.28	64.23529412	292.5689655	296.0357143	39.5824
7.428571429	1.757142857	1099.930233	1449.093023	62.47169811	64.23529412	292.8596491	297.0181818	73.51017143
6.24	1.3	1100.085714	1449.307692	62.42222222	64.3125	294.875	298.0350877	61.748544
27.13043478	9.334782609	1099.588235	1449.571429	62.34146341	64.20689655	293.5636364	297.754386	268.4719304
11.7	3.4	1099.088235	1449.810811	61.6122449	63.25	296.0877193	298.9824561	115.77852
78	28.9	1098.928571	1449.15	62.19148936	63.96296296	295.1578947	298.9444444	771.8568
4.216216216	0.521621622	1099.434783	1449	62.35714286	63.66666667	289.6206897	292.7068966	41.72198919
9.176470588	2.429411765	1099.731707	1448.974359	62.25	64.26923077	292.4035088	296.0526316	90.80668235
26	8.9	1099.525	1450.085106	62.19512195	63.96666667	295.3584906	298.6923077	257.2856
10.4	2.9	1099.85	1449.590909	61.76190476	63.78787879	292.0943396	295.1454545	102.91424
7.090909091	1.627272727	1098.95	1450.361111	62.29166667	64.02702703	294.1090909	297.2241379	70.1688
9.176470588	2.429411765	1099.162791	1450.125	63.17948718	64.51612903	292.0877193	293.0769231	90.80668235
11.14285714	3.185714286	1100.111111	1448.428571	62.16666667	63.87096774	292.5	295.8103448	110.2652571
11.14285714	3.185714286	1099.512195	1449.970588	62.26666667	63.59259259	291.7115385	295.4528302	110.2652571
11.7	3.4	1099.548387	1449.8	62.11627907	63.72413793	295.0925926	298.9473684	115.77852
7.090909091	1.627272727	1099.585366	1450.093023	61.2826087	63.15151515	296.625	300.1551724	70.1688
12	3.515384615	1099.916667	1449.571429	60.82926829	62.26923077	294.6	298.7037037	118.7472
18	5.823076923	1057.538462	1453.208333	61.64444444	63.21212121	291.9285714	297.125	178.1208
16.59574468	5.282978723	1099.678571	1448.891892	62.62790698	64.03846154	296.12	301.7777778	164.2248511
10.17391304	2.813043478	1099.962963	1451.925	59.85	61.8125	290.1052632	292.875	100.6769739
24	8.130769231	1099.166667	1446.75	62.43137255	64.2	294.6724138	298.0344828	237.4944
11.14285714	3.185714286	1099.558824	1449.763158	62.3902439	64.5	291.4285714	295.9827586	110.2652571
10.75862069	3.037931034	1099.458333	1451.108108	60.73809524	62.40625	292.3275862	295.9655172	106.4630069
39	13.9	1099.45	1448.578947	61.775	63.15384615	296.3392857	299.3076923	385.9284
11.77358491	3.428301887	1099.53125	1449.088889	62.87755102	64.625	292.125	294.7454545	116.5066868
28.36363636	9.809090909	1099.5	1449.428571	61.45454545	63.07317073	293.4716981	296.9615385	280.6752
6.933333333	1.566666667	1099.233333	1449.5	61.27906977	63.3030303	291.6071429	295.8727273	68.60949333
3.25	0.15	1099.658537	1449.547619	60.58333333	61.91666667	289.8793103	292.7931034	32.1607
16.42105263	5.215789474	1099.935484	1449.166667	59.43478261	61.25	293.0714286	297.8947368	162.4961684
11.14285714	3.185714286	1099.277778	1448.589744	59.5	61.17647059	293.7894737	297.6538462	110.2652571
45.88235294	16.54705882	1099.6	1449.315789	60.09090909	61.79310345	295.4230769	298.5892857	454.0334118
23.63636364	7.990909091	1099.828571	1449.35	59.69230769	61.17142857	295.6181818	300.4339623	233.896
17.33333333	5.566666667	1099.735294	1449.8	60.20408163	61.80645161	293.8928571	297.3090909	171.5237333
14.625	4.525	1099.631579	1449.647059	60.18181818	62.21428571	293.7586207	297.2982456	144.72315
20.8	6.9	1099.866667	1450.222222	60.91891892	62.51724138	294.3928571	297.8392857	205.82848
15.6	4.9	1099.514286	1449.833333	61.23913043	63.11428571	294.4150943	298.4285714	154.37136
6.24	1.3	1098.884615	1449.088235	57.97727273	59.53333333	288.9655172	292.1896552	61.748544
7.090909091	1.627272727	1099.333333	1449.204545	57.43478261	59.33333333	294.3584906	299.4814815	70.1688
27.52941176	9.488235294	1099.583333	1449.058824	57.74418605	59.82758621	292.5454545	296.4339623	272.4200471
62.4	22.9	1099.073171	1449.5	58.23404255	59.72222222	296.2931034	298.9272727	617.48544
4	0.438461538	1099.571429	1449.578947	52.11904762	54.02857143	291.3928571	295.8	39.5824
4	0.438461538	1099.788462	1449.263158	54.8372093	56.45	294.9090909	297.7857143	39.5824
3.183673469	0.124489796	1100.348837	1449.783784	57	58.6	294.9074074	297.5535714	31.50435918
3.391304348	0.204347826	1100.487805	1449.875	57.95833333	59.47368421	291.5172414	295.3454545	33.5589913
8.666666667	2.233333333	1099.363636	1449.34375	58.59574468	60.51282051	293.6545455	297.5714286	85.76186667
52	18.9	1099.511628	1449.59375	60.10416667	61.48387097	293.1568627	297.6607143	514.5712
39	13.9	1099.953488	1449.21875	61.90909091	63.7	293.6923077	298.2545455	385.9284
19.5	6.4	1099.233333	1449.45	60.36363636	62.48387097	294.9622642	298.5925926	192.9642
8.666666667	2.233333333	1099.395349	1449.756757	60.85365854	62.875	288.6909091	292.8363636	85.76186667
12.64864865	3.764864865	1099.76087	1449.027778	61.5952381	62.90909091	294.6909091	296.8	125.1659676
18.35294118	5.958823529	1099.255319	1449.130435	58.52173913	60.32258065	296.125	300.2	181.6133647
16.59574468	5.282978723	1099.55102	1449.3125	58.64444444	60.38461538	294.1785714	298.5	164.2248511
16.42105263	5.215789474	1099.4	1449.947368	58.47727273	60.28571429	297.625	301.1481481	162.4961684
9.36	2.5	1099.152174	1449.648649	58.40425532	60.57692308	296.7636364	301.5087719	92.622816
16	5.053846154	1099.777778	1448.804878	58.35294118	60.18181818	291.5087719	295.0357143	158.3296
6	1.207692308	1099.702703	1449.647059	58.34090909	60.39285714	297.4464286	299.5614035	59.3736
10.06451613	2.770967742	1100.375	1449.695652	58.92857143	60.23529412	295	297.4727273	99.59442581
9.75	2.65	1099.76	1450.085714	57.88372093	59.6875	294.7321429	296.8846154	96.4821
19.5	6.4	1099.033333	1449.372093	58.73809524	60.37037037	296	298.6896552	192.9642
9.957446809	2.729787234	1098.631579	1448.323529	57.31578947	59.4375	294.0689655	297.4736842	98.53491064
6.5	1.4	1098.95	1450.0625	56.72727273	58.63636364	290.8421053	294.3518519	64.3214
8.914285714	2.328571429	1099.461538	1449.259259	56.57894737	58.27272727	292.7586207	295.2222222	88.21220571
2.888888889	0.011111111	1100.02439	1448.435897	56.65789474	58.12121212	293.0714286	295.6909091	28.58728889
7.8	1.9	1100.292683	1448.205128	55.84210526	58	294.6	298.9818182	77.18568
20.8	6.9	1100.457143	1449.282051	56.57777778	58.03225806	290.3103448	293.1896552	205.82848
26	8.9	1099.289474	1451.361111	58.39534884	60.13043478	292.122807	295.8545455	257.2856
39	13.9	1099.473684	1449.472222	58.14285714	59.92857143	291.9818182	294.2592593	385.9284
9.957446809	2.729787234	1099.575	1448.921053	54	55.83333333	288.5357143	291.8545455	98.53491064
42.54545455	15.26363636	1099.487179	1448.651163	51.86666667	53.54545455	292.7358491	295.1454545	421.0128
6.782608696	1.508695652	1099.266667	1449.257143	51.13953488	53.11904762	290.6428571	295.1071429	67.11798261
5.571428571	1.042857143	1100.071429	1448.697674	49.64583333	51.48148148	294	298.1090909	55.13262857
22.28571429	7.471428571	1100.0625	1449.928571	49.78723404	51.5	290.4642857	292.5263158	220.5305143
3.545454545	0.263636364	1100.054054	1449.27907	48.75	50.53333333	290.4285714	293.9230769	35.0844
6.638297872	1.453191489	1100.677419	1448.863636	48.34883721	49.93548387	290.8181818	294.0727273	65.68994043
13	3.9	1100.5	1452.714286	48.61538462	50.09090909	294.7321429	297.7894737	128.6428
16.59574468	5.282978723	1099.263158	1447.512821	59.76086957	61.55	291.1071429	294.4285714	164.2248511
15.6	4.9	1099.948718	1449.297872	59.13043478	61.11111111	293.8392857	296.2241379	154.37136
6.24	1.3	1099.351351	1450.162162	58	59.86666667	293.7962963	296.9056604	61.748544
15.6	4.9	1099.684211	1449.097561	60.32608696	62.44117647	288.7413793	293.4035088	154.37136
6.5	1.4	1099.815789	1448.714286	61.31914894	62.97142857	286.4285714	290	64.3214
22.28571429	7.471428571	543.2352941	1382.357143	56.73333333	58.48387097	293.3269231	298.0555556	220.5305143
12	3.515384615	1099.8125	1449.85	55.12765957	56.88235294	288.3214286	291.6666667	118.7472
29.71428571	10.32857143	1099.705882	1451.060606	57.04545455	58.57692308	291.9818182	295.9444444	294.0406857
10.57627119	2.96779661	1099.515152	1448.972222	55.35555556	56.61290323	279.7454545	281.3090909	104.6585492
5.886792453	1.164150943	1099.166667	1449.615385	56.16666667	58	290.8113208	294.7222222	58.2533434
7.8	1.9	1099.722222	1448.897436	56.85106383	58.71052632	293.8301887	298.9636364	77.18568
18.72	6.1	1099.032258	1450.027027	57.46808511	58.72727273	293.037037	297.3888889	185.245632
39	13.9	1098.848485	1449.162162	54	55.88235294	292.7222222	296.6363636	385.9284
39	13.9	1098.906977	1449.578947	54.3255814	55.56097561	297.1481481	301.1071429	385.9284
12	3.515384615	1099.02381	1448.804348	56.72727273	58.4	297.1818182	300.2830189	118.7472
12	3.515384615	1099.261905	1449.288889	56.14	58.16666667	288.4339623	291.1636364	118.7472
31.2	10.9	1099.888889	1449.772727	56.60869565	58.12121212	290.0545455	293.6140351	308.74272
39	13.9	1099.975	1449.685714	54	55.96666667	293.3928571	297.8846154	385.9284
31.2	10.9	1100.342105	1449.297297	56.53658537	58.39393939	284.1481481	287.2807018	308.74272
39	13.9	1099.575758	1451.941176	56.85106383	58.58064516	289.9423077	293.2280702	385.9284
4.727272727	0.718181818	1098.189189	1448.514286	57.02702703	58.37037037	291.8490566	295.8928571	46.7792
5.2	0.9	1100.6	1449.189189	56.52083333	58.2173913	292.6909091	295.3636364	51.45712
15.91836735	5.02244898	1099.368421	1450.219512	56.44186047	58.3	292.4464286	295.8301887	157.5217959
7.090909091	1.627272727	1098.775	1450.785714	57.06521739	58.59259259	291.4285714	295.6363636	70.1688
104	38.9	1098.642857	1448.885714	55.8	57.51428571	291.4716981	293.9464286	1029.1424
52	18.9	1099.23913	1449.761905	57	58.5483871	289.6034483	293.637931	514.5712
26	8.9	1100.12	1449.045455	56.64444444	58.45454545	294.8363636	297.7169811	257.2856
52	18.9	1098.68	1451.2	56.9787234	58.45454545	295.1754386	300.4444444	514.5712
2.943396226	0.032075472	1100.117647	1449.166667	56.25581395	57.90625	286.490566	290.6851852	29.1266717
31.2	10.9	1099.583333	1449.216216	56.11363636	57.61290323	289.3636364	293.5555556	308.74272
6.5	1.4	1099.3125	1448.829268	55.85714286	57.67647059	291.7777778	293.6428571	64.3214
4.105263158	0.478947368	1099.74359	1449.605263	55.3125	56.8974359	290.9473684	295.6666667	40.62404211
19.5	6.4	1100.288889	1449.023256	56.27083333	57.53571429	292.9454545	296.8	192.9642
15.6	4.9	1099.857143	1449.804878	56.40425532	57.89189189	291.4464286	294.7407407	154.37136
22.28571429	7.471428571	1098.877551	1449.487805	57	58.63636364	286.5892857	289.1428571	220.5305143
25.16129032	8.577419355	1099.409091	1449.547619	56.89795918	58.37931034	296.537037	301.3272727	248.9860645
13.56521739	4.117391304	1100.025	1449.767442	56.89583333	58.5	294.537037	298.2075472	134.2359652
9.551020408	2.573469388	1099.369565	1448.971429	56.86842105	58.55	290.9821429	296.7272727	94.51307755
11.7	3.4	1100.288889	1449.538462	57.24390244	58.48148148	299.6481481	305.0181818	115.77852
15.91836735	5.02244898	1100.204545	1450.404762	56.70454545	58.86111111	291.8571429	295.8571429	157.5217959
9.75	2.65	1099.75	1449.891892	57.06382979	58.57142857	297.6428571	301.7818182	96.4821
14.18181818	4.354545455	1100.459459	1448.857143	57.02325581	58.53846154	294.0178571	298	140.3376
11.41463415	3.290243902	1099.172414	1449.382353	56.6	58.53333333	290.4363636	294.3137255	112.9546537
12	3.515384615	1099.487179	1449.631579	56.64285714	58.66666667	287.5	292.5818182	118.7472
9.75	2.65	1098.6	1450.096774	56.89795918	58.46875	291	296.1132075	96.4821
14.85714286	4.614285714	1099.069767	1447.75	56.72916667	58.55882353	295.6909091	300.1698113	147.0203429
13.86666667	4.233333333	1099.475	1448.976744	56.79591837	58.69444444	295.0892857	299.1754386	137.2189867
12	3.515384615	1100.4375	1449.170732	57.15555556	58.66666667	298.5849057	303.1428571	118.7472
4.588235294	0.664705882	1099.282609	1449.512821	56.75555556	58.52941176	291.2407407	295.7777778	45.40334118
6.782608696	1.508695652	1099.590909	1449.116279	56.88636364	58.63333333	290.037037	294.3454545	67.11798261
26	8.9	1098.886364	1450.583333	56.425	57.77777778	293.1454545	296.5	257.2856
22.28571429	7.471428571	506.9411765	1358.967742	54.95	56.84375	291.0357143	294.1090909	220.5305143
11.55555556	3.344444444	1098.969697	1448.857143	55.39583333	57.25	291.7222222	294.6226415	114.3491556
15.6	4.9	1099.5625	1449.648649	56.33333333	58.15384615	290.0740741	293.1754386	154.37136
4.875	0.775	1099.153846	1449.75	56.58695652	57.925	296.5087719	300.877193	48.24105
8.210526316	2.057894737	1099.292683	1449.53125	55.84444444	57.9375	293.8703704	297.4464286	81.24808421
7.8	1.9	1100.021739	1449.205882	55.5	57.06060606	296.4074074	300.1454545	77.18568
39	13.9	1100	1449.517241	55.76190476	57.52777778	291.4107143	295.3392857	385.9284
19.5	6.4	1100.104167	1449.111111	56.14285714	58.14705882	292.1403509	295.3448276	192.9642
14.18181818	4.354545455	1100.05	1448.863636	54.35555556	56.25806452	292.9285714	296.8947368	140.3376
10.4	2.9	1100.153846	1452.638889	52.90243902	54	293.1052632	297.0175439	102.91424
9.454545455	2.536363636	1098.647059	1450.193548	50.31914894	52.13888889	289.1929825	292.2857143	93.5584
24	8.130769231	1099.318182	1449.394737	51	53	296.3508772	300.6363636	237.4944
9	2.361538462	1099.615385	1450.864865	50.80952381	52.56756757	291.5263158	297.0178571	89.0604
9.36	2.5	1099.608696	1447.771429	50.65217391	52.08823529	292.1052632	295.2407407	92.622816
15.6	4.9	1099.583333	1449.222222	50.02272727	52	291.9482759	294.9473684	154.37136
52	18.9	1099.434783	1449.325	50.9787234	52.80555556	291.9090909	295.6226415	514.5712
26	8.9	1099.5	1450.368421	50.45454545	52.38709677	289	291.7735849	257.2856
18.90909091	6.172727273	1099.633333	1449.472222	50.66666667	52.51515152	293.5357143	296.5	187.1168
17.33333333	5.566666667	1099.342105	1449.242424	50.54545455	52.35294118	290.3859649	294.1428571	171.5237333
78	28.9	1099.772727	1448.925	50.73333333	52.70588235	293.5714286	295.5964912	771.8568
9.454545455	2.536363636	1099.615385	1450.189189	50.86956522	52.48484848	290.5614035	292.3396226	93.5584
44.57142857	16.04285714	1099.923077	1448.9	50.30232558	52.31034483	295.4363636	299.0178571	441.0610286
7.090909091	1.627272727	1099.25	1448.472222	47.2	48.71428571	293.9090909	296.9272727	70.1688
18.35294118	5.958823529	1099.3	1449.621622	48.875	50.625	290.6226415	295.5535714	181.6133647
19.5	6.4	1099.65625	1448.820513	50.52272727	52.6	292.5892857	295.5263158	192.9642
29.25	10.15	1099.243243	1448.380952	51.18181818	52.97142857	296.7857143	299.3396226	289.4463
7.609756098	1.826829268	1098.731707	1450.333333	51.23076923	52.90909091	295.3448276	299.0350877	75.30310244
7.428571429	1.757142857	1099.681818	1448	50.54901961	52.21212121	297.1851852	300.2931034	73.51017143
15.6	4.9	1099.823529	1449.069767	49.93478261	52.21621622	291.8275862	295.8448276	154.37136
3.9	0.4	1100	1449.324324	51	52.78571429	293.2142857	295.7358491	38.59284
8.210526316	2.057894737	1099.65625	1449.777778	50.92857143	52.89473684	292.2105263	295.7142857	81.24808421
19.5	6.4	1099.352941	1449.264706	51.61702128	53.25714286	290.7719298	293.5892857	192.9642
39	13.9	1098.977778	1450.090909	51.08510638	53.06666667	291.0576923	295.1578947	385.9284
10.4	2.9	1099.533333	1448.459459	50.47727273	52.03125	290.5614035	294.7017544	102.91424
14.18181818	4.354545455	1100	1448.820513	51.575	53	296.4909091	301.7454545	140.3376
6.782608696	1.508695652	1099.702703	1449.026316	51.425	52.97560976	291.5818182	296.2222222	67.11798261
16.59574468	5.282978723	1099.358491	1449.357143	51.41176471	53.17241379	297.0344828	301.5090909	164.2248511
8.432432432	2.143243243	1098.75	1449.75	50.97619048	52.33333333	293.4181818	296.5714286	83.44397838
10.17391304	2.813043478	1100.116279	1449.405405	51.25	53.10714286	292.7192982	296.8103448	100.6769739
4.727272727	0.718181818	1099.577778	1450.255814	51.4	52.96774194	296.0714286	299.2181818	46.7792
17.33333333	5.566666667	1099.408163	1449.741935	51.1	52.93333333	292.6415094	296.6964286	171.5237333
11.14285714	3.185714286	1099.681818	1448.969697	51.42553191	53.07317073	292.3392857	294.7719298	110.2652571
26	8.9	1100.085106	1449.3	51.4893617	53.02857143	296.4736842	300.5090909	257.2856
13.27659574	4.006382979	1100.325581	1449.113636	51.51162791	53.20588235	293.7719298	299.0185185	131.3798809
7.090909091	1.627272727	1100.574468	1449.619048	50.87755102	52.6969697	293.0740741	296.7678571	70.1688
19.5	6.4	1100.137931	1451	51.34090909	53.03333333	289.0363636	292.1538462	192.9642
3.714285714	0.328571429	1099.882353	1450.055556	50.775	52.54545455	291.8545455	295.8214286	36.75508571
5.777777778	1.122222222	1099.5	1449.060606	51.72093023	53.03030303	290.7818182	295.4464286	57.17457778
16.13793103	5.106896552	1099.7	1449.75	51.4	53	287.1509434	291.2222222	159.6945103
156	58.9	1099.185185	1449.923077	50.18181818	52.22222222	288.6607143	293.0555556	1543.7136
22.94117647	7.723529412	1099.741935	1448.394737	50.97777778	52.19512195	288	291.5925926	227.0167059
10.06451613	2.770967742	1099.525	1449.666667	51.70454545	53.125	294.7058824	299.0727273	99.59442581
7.428571429	1.757142857	1099.447368	1449.119048	51.43902439	53.17241379	289.75	295.2075472	73.51017143
26	8.9	1099.418605	1449.128205	50.11111111	51.67647059	289.4035088	293.8909091	257.2856
14.625	4.525	1099.113636	1448.738095	50.75555556	52.55882353	291.2222222	294.3636364	144.72315
6.782608696	1.508695652	1099.823529	1447.780488	51.07692308	52.93103448	292.5614035	297.0892857	67.11798261
6	1.207692308	1099.847826	1452.447368	51.34042553	52.97142857	295.6428571	298.6181818	59.3736
8.432432432	2.143243243	1098.916667	1449	51.5625	53.05882353	296.7254902	301	83.44397838
8	1.976923077	1099.840909	1449.238095	50.82978723	52.65789474	292.2807018	296.1428571	79.1648
13.86666667	4.233333333	1100.069767	1449.351351	51.13043478	53.02857143	296.7636364	301.6428571	137.2189867
28.36363636	9.809090909	1100.27907	1448.227273	51.14583333	53.26666667	297.6666667	302.2105263	280.6752
13.56521739	4.117391304	1100.052632	1450.772727	50.53191489	52.10810811	291.4642857	296.6862745	134.2359652
15.6	4.9	1099.243243	1450.357143	51.16216216	52.66666667	291.2321429	294.7894737	154.37136
14.85714286	4.614285714	1099.973684	1449.302326	51.55102041	53.17241379	291.4210526	295.3508772	147.0203429
26	8.9	1099.588235	1448.295455	51.25	53.0625	294.2909091	299.1929825	257.2856
11.14285714	3.185714286	1099.325581	1449.255814	51.55769231	53.2972973	290.7586207	295.3333333	110.2652571
15.6	4.9	1099.97619	1449.553191	50.68085106	52.57894737	288.0740741	291.9482759	154.37136
7.428571429	1.757142857	1099.666667	1448.846154	49.04878049	50.81818182	288.0714286	290.8	73.51017143
28.36363636	9.809090909	1099.823529	1449.76087	49.02083333	50.62857143	289.125	293.6363636	280.6752
12.31578947	3.636842105	1100.09375	1448.791667	50.23913043	52.07894737	285.4385965	291.1636364	121.8721263
156	58.9	1099.8	1449.142857	51.54545455	53.10714286	296.4107143	298.537037	1543.7136
16.71428571	5.328571429	1099.46875	1448.814815	50.74418605	52.45945946	289.5714286	293.3793103	165.3978857
10.17391304	2.813043478	1099.793103	1448.368421	51.65217391	53.1875	296.962963	300.6734694	100.6769739
5.672727273	1.081818182	1099.789474	1450.7	51.53191489	53.17647059	293.9272727	298.2678571	56.13504
8.914285714	2.328571429	1099.666667	1452.657895	50.88372093	52.5625	295.1754386	297.8421053	88.21220571
22.28571429	7.471428571	1099.583333	1449.71875	51.45238095	52.84375	288.9310345	292.1929825	220.5305143
9.176470588	2.429411765	1099.380952	1449.09375	50.27083333	51.94444444	287.4736842	289.6545455	90.80668235
9	2.361538462	1099.411765	1449.28	46.55813953	47.58064516	289.9272727	293.537037	89.0604
7.090909091	1.627272727	1099.117647	1449.628571	50.75	52.35483871	287.1785714	291.1454545	70.1688
21.27272727	7.081818182	1099.575758	1449.305556	50.91111111	52.85294118	292.4727273	296.6727273	210.5064
6.117647059	1.252941176	1099.809524	1449.6	50.06976744	51.66666667	293.2321429	298.537037	60.53778824
8.666666667	2.233333333	1099.075	1450	49.19565217	51.34285714	300.1454545	304.5714286	85.76186667
9.36	2.5	1099.5	1449.368421	51.07692308	52.89655172	291.0377358	295.8	92.622816
16.71428571	5.328571429	1099.473684	1448.860465	50.34782609	52.08571429	287.7090909	290.5263158	165.3978857
8.666666667	2.233333333	1100.236842	1449.666667	50.825	52.40625	296.7735849	300.5185185	85.76186667
13	3.9	1100.068182	1450.764706	50.72093023	52.23333333	291.877193	293.5	128.6428
16.86486486	5.386486486	1099.738095	1449.904762	51.06666667	53.05405405	292.7272727	296.375	166.8879568
7.090909091	1.627272727	1099.236842	1448.352941	51.18367347	53.02380952	293.75	297.1052632	70.1688
18.90909091	6.172727273	1100.06383	1449.707317	50.95555556	53.07407407	289.5263158	293.8571429	187.1168
6.24	1.3	1099.806452	1449.785714	51.46808511	53.09677419	292.7407407	296.7368421	61.748544
18.90909091	6.172727273	1100.078947	1449.292683	51	52.92105263	289.25	291.5357143	187.1168
18.72	6.1	1098.974359	1449.676471	51.11904762	52.69230769	291.9090909	296.962963	185.245632
10.94736842	3.110526316	1098.534884	1449.266667	51.1	53.06666667	290.1428571	295.0178571	108.3307789
5.571428571	1.042857143	1099.851064	1449.147059	51.2	53.21875	294.6666667	298	55.13262857
9.75	2.65	1099.466667	1449.815789	50.66666667	52.33333333	290	292.7413793	96.4821
8.666666667	2.233333333	1099.071429	1448.95	51.02	52.83333333	290.9824561	294.2241379	85.76186667
22.28571429	7.471428571	1099.608696	1449.527778	51.04347826	53.09375	292.877193	296.5178571	220.5305143
10.75862069	3.037931034	403.037037	1449.074074	51.41860465	53.13333333	294.4285714	297.8545455	106.4630069
17.33333333	5.566666667	1040.574468	1447.531915	51.31111111	53	292.7758621	295.8070175	171.5237333
8.210526316	2.057894737	1100.108108	1450.782609	51.39130435	53.08333333	290.2631579	293.7931034	81.24808421
8.830188679	2.296226415	1099.315789	1450.411765	51.26190476	53.03030303	290.5892857	293.9821429	87.38001509
19.5	6.4	1099.916667	1449.05	51.38636364	53.09090909	299.1698113	302.0925926	192.9642
28.36363636	9.809090909	1100.135135	1449.731707	50.89361702	52.58823529	301.4482759	306.490566	280.6752
15.6	4.9	1099.8125	1449.235294	51.04081633	52.88235294	291.1636364	296.6727273	154.37136
31.2	10.9	1099.52381	1450.04878	50.75609756	52.48148148	290.4035088	293.8909091	308.74272
19.5	6.4	1098.142857	1450.217391	51	52.96774194	294.8070175	299.1428571	192.9642
26	8.9	1098.888889	1449.428571	51.45238095	53.03225806	290.5272727	293.7894737	257.2856
20.34782609	6.726086957	1100.097561	1448.382979	51.26086957	52.94736842	288.9454545	294.1111111	201.3539478
9.454545455	2.536363636	1099.489796	1450.325	51.02	52.88888889	287.7142857	292.4385965	93.5584
15.6	4.9	1099.355556	1448.738095	51.47368421	53.16	289.7241379	292.8965517	154.37136
39	13.9	1099.111111	1448.439024	51.2	53.10344828	291.6111111	295.5263158	385.9284
15	4.669230769	1100.270833	1448.738095	50.86046512	52.70833333	292.4230769	294.754717	148.434
22.28571429	7.471428571	1099.307692	1450.02381	50.63636364	52.48148148	290.5576923	294.3333333	220.5305143
14.18181818	4.354545455	1098.916667	1449.837209	50.49019608	52.28125	290.0943396	291.8035714	140.3376
66.85714286	24.61428571	1098.957447	1448.297297	51.34090909	53.08	289.3157895	293.2758621	661.5915429
8.830188679	2.296226415	1099.38	1448.369565	50.76	53	290.3333333	293.6896552	87.38001509
8.666666667	2.233333333	1099.425532	1449.790698	48.91489362	50.61764706	289.5849057	294.3157895	85.76186667
52	18.9	1100.066667	1448.55	46.23076923	47.72413793	288.1206897	291.6666667	514.5712
10.06451613	2.770967742	1100.225	1449.153846	47.55813953	49.86842105	288.6862745	292.9272727	99.59442581
13	3.9	961	1453.903226	51.26086957	52.94594595	290.9636364	295.5192308	128.6428
12.48	3.7	425.4074074	1448.03125	50.4	52.61290323	293.1403509	295.5740741	123.497088
12.64864865	3.764864865	1082.934783	1447.35	51.11111111	52.90625	289.5818182	292.2727273	125.1659676
17.33333333	5.566666667	1099.717949	1449.075	50.97674419	52.67647059	289.7321429	293.2105263	171.5237333
13	3.9	1099.513514	1448.545455	50.35416667	52.17857143	293.5614035	297.2758621	128.6428
14.18181818	4.354545455	1100.324324	1449.5	49.81632653	51.87878788	286.5517241	290.3684211	140.3376
28.36363636	9.809090909	1099.405405	1450.414634	49.55813953	51.80555556	289.4528302	293.1818182	280.6752
3.545454545	0.263636364	331.6956522	1237.658537	49.15909091	51	286.125	289.6428571	35.0844
7.255813953	1.690697674	1039.846154	1448	49.24444444	50.84375	287.1851852	291.5789474	71.80063256
39	13.9	1099.826087	1449.085714	49.23404255	50.83870968	292.9074074	297.1372549	385.9284
22.28571429	7.471428571	1099.62963	1449.871795	48.52380952	50.34482759	289.9137931	294.8421053	220.5305143
7.428571429	1.757142857	1099.225806	1450.068966	48.72727273	50.61290323	287.4464286	290.3103448	73.51017143
31.2	10.9	1099.243243	1449.195122	49.6	51.3125	290.4736842	294.8363636	308.74272
12	3.515384615	1099.388889	1449.322581	45.83333333	47.57142857	292.2830189	297.4909091	118.7472
78	28.9	1099.217391	1449.186047	46.2195122	47.90909091	292.3392857	296.6181818	771.8568
34.66666667	12.23333333	1099.268293	1449.204545	45.62790698	47.5862069	290.4821429	294.8461538	343.0474667
14.18181818	4.354545455	1100.425	1449.243902	45.38461538	47.03125	287.2909091	291.8070175	140.3376
20.8	6.9	1100.117647	1450.594595	45.875	47.42105263	298.375	301.7894737	205.82848
10.06451613	2.770967742	1100.371429	1449.939394	45.47619048	47.3030303	294.0350877	299.6111111	99.59442581
8.210526316	2.057894737	1099.137931	1450.685714	44.625	46.45714286	288.7017544	293.3275862	81.24808421
9.454545455	2.536363636	1098.818182	1449.666667	44.475	46.12	294.9482759	299.1964286	93.5584
10.63636364	2.990909091	1099.365854	1448.736842	44.26086957	46.12121212	290.2678571	294.3859649	105.2532
19.5	6.4	1099.72973	1450.131579	44.97297297	46.40740741	296.3090909	300.2142857	192.9642
44.57142857	16.04285714	1099.136364	1450.028571	44.54545455	46.03846154	285.9107143	290.1403509	441.0610286
10.63636364	2.990909091	1099.486486	1448.875	44.85	46.43333333	292.1320755	296.0526316	105.2532
20.8	6.9	1100.025	1448.702703	44.53191489	45.94285714	292.8148148	295.7321429	205.82848
26.89655172	9.244827586	1099.5	1450.387097	47.44680851	49.25581395	292.5263158	296.9090909	266.1575172
11.14285714	3.185714286	1099.675	1450.521739	47.73913043	49.51515152	293.0892857	297.2857143	110.2652571
11.14285714	3.185714286	1099.733333	1449.65	48.60416667	50.13513514	290.037037	293.5636364	110.2652571
12.31578947	3.636842105	1099.875	1449.297297	48.725	50.54545455	285.9642857	290.490566	121.8721263
25.2972973	8.62972973	1099.634146	1448.864865	63.93181818	65.96153846	295.0588235	300.1153846	250.3319351
13.44827586	4.072413793	1099.675	1448.727273	64.175	65.88888889	292.862069	297.2105263	133.0787586
27.52941176	9.488235294	1099.860465	1449.333333	64.18181818	65.93548387	295.2807018	299.5517241	272.4200471
13.92857143	4.257142857	1100.2	1450.575	64.32608696	65.88888889	294.3846154	298.1666667	137.8315714
14.18181818	4.354545455	1099.709677	1449.727273	64.1627907	65.74193548	293.8545455	298.9655172	140.3376
17.33333333	5.566666667	1099.806452	1449.285714	63.45454545	65.26470588	289.9642857	294.5178571	171.5237333
5.571428571	1.042857143	1099.37931	1449.25	63.25	65	288.7321429	291.7368421	55.13262857
12.73469388	3.797959184	1099.769231	1449.888889	63.34782609	65.03030303	283.1454545	287.3962264	126.0174367
12.48	3.7	1099.424242	1449.5625	63.10810811	65	290.5185185	294.3035714	123.497088
7.93220339	1.950847458	1099.24	1449.382353	63.33333333	65.06060606	293.462963	297.5576923	78.49391186
8.210526316	2.057894737	1099.517241	1448.358974	63.44444444	65.125	291.6	296.537037	81.24808421
11.14285714	3.185714286	1099.310345	1448.971429	62.47619048	64.15	291.5535714	296.4716981	110.2652571
8.666666667	2.233333333	1099.709677	1448.735294	62.16666667	64.08333333	295.4814815	299.1929825	85.76186667
18.35294118	5.958823529	1099.96875	1449.764706	63.73913043	65.22222222	290.3392857	294.7413793	181.6133647
7.8	1.9	1099.258065	1449.238095	63.41176471	64.94736842	292.1071429	296.3454545	77.18568
104	38.9	1099.142857	1450.210526	63.36734694	65.19444444	288.2363636	292.2	1029.1424
15.6	4.9	1099.16129	1449.190476	62.97826087	65.1	291.3392857	293.9482759	154.37136
7.609756098	1.826829268	1099.825	1449.318182	63.04255319	65.0625	290.5344828	295.4385965	75.30310244
9.176470588	2.429411765	1099.470588	1449.648649	62.97674419	64.5	288.6071429	292.7272727	90.80668235
13	3.9	1099.318182	1448.4	64.60784314	65.92105263	291.0701754	294	128.6428
11.14285714	3.185714286	1099.857143	1448.731707	63.45454545	65.03225806	290.6607143	294.5925926	110.2652571
9.551020408	2.573469388	1099.585366	1449.690476	63.44	64.72222222	287.3571429	291.6785714	94.51307755
6.638297872	1.453191489	1099.702703	1449.95122	62.91304348	64.33333333	287.9074074	292.1964286	65.68994043
4.105263158	0.478947368	1099.904762	1447.658537	63.84615385	65.78378378	284.4181818	288.1454545	40.62404211
2.943396226	0.032075472	1100.333333	1448.522727	63.6	64.93939394	288.3571429	292.9074074	29.1266717
6.782608696	1.508695652	1099.631579	1450.116279	60.43137255	62.23684211	289.1538462	290.7777778	67.11798261
10.75862069	3.037931034	1099.645161	1450.289474	63.91111111	65.57142857	291.8545455	294.9464286	106.4630069
24	8.130769231	1099.422222	1450	64.13636364	65.86111111	286.9482759	289.8545455	237.4944
8.210526316	2.057894737	1100.514286	1449.8	60.97916667	63.06666667	286.9074074	290.7735849	81.24808421
10.06451613	2.770967742	1099.486486	1449.866667	63.31707317	65.33333333	288.9821429	292.75	99.59442581
9.75	2.65	1100.294118	1451.047619	62.91111111	64.3125	291.0545455	295.5964912	96.4821
20.12903226	6.641935484	399.775	1449.131579	63.81632653	65.53571429	302.5098039	307.0588235	199.1888516
28.36363636	9.809090909	399.5555556	1449.634146	63.36734694	65.16666667	288.8703704	295.2962963	280.6752
10.88372093	3.086046512	400.047619	1449.227273	63.49090909	65	293.2068966	297.375	107.7009488
18.90909091	6.172727273	1100.365854	1448.72093	60.4375	61.7027027	292.3703704	297.9649123	187.1168
10.88372093	3.086046512	1099.794872	1449.473684	60.51219512	61.87878788	293.6603774	299.2641509	107.7009488
7.8	1.9	1100.405405	1449.15	59.75555556	61.94594595	288.7894737	292.4035088	77.18568
13.37142857	4.042857143	1099.527778	1449.833333	60.13953488	61.72222222	293.6428571	297.2777778	132.3183086
8.830188679	2.296226415	1099.212121	1449.611111	59.94	61.78947368	291.9056604	296.3461538	87.38001509
18.72	6.1	1099.482759	1450.315789	59.25490196	60.40625	294.6964286	297.9454545	185.245632
16.42105263	5.215789474	1047.380952	1450.647059	60.13461538	61.88888889	292.5	297.5	162.4961684
13	3.9	1099.314286	1449.452381	60.65306122	61.66666667	292.4181818	297.1132075	128.6428
8.914285714	2.328571429	1099.625	1449.178571	60.04347826	61.88888889	292.0363636	296.5	88.21220571
7.8	1.9	1099.272727	1449.305556	59.38297872	61.08108108	293.2777778	296.0576923	77.18568
20.34782609	6.726086957	1098.765957	1449.166667	60.36	61.825	288.7222222	292.4150943	201.3539478
13	3.9	1100.357143	1449.236842	58.06521739	59.69230769	288	291.4561404	128.6428
13.37142857	4.042857143	1099.891892	1447.902439	55.8125	57.36666667	292.2075472	294.625	132.3183086
17.33333333	5.566666667	1099.590909	1449.295455	59.34782609	60.75609756	289.1636364	293.3461538	171.5237333
16.86486486	5.386486486	1099.727273	1449.258065	60.24	61.82857143	289.1320755	292.0555556	166.8879568
7.428571429	1.757142857	1099.534884	1449.372093	60.64444444	62	286.3818182	290.9107143	73.51017143
23.4	7.9	1099.820513	1448.333333	59.24390244	61.47058824	288.6607143	292.3333333	231.55704
8.666666667	2.233333333	1099.297872	1448.533333	59.95555556	61.90697674	291.125	294.8571429	85.76186667
18.35294118	5.958823529	1099.622222	1449.5	60.36734694	61.38235294	290.4285714	293.2727273	181.6133647
19.5	6.4	1099.636364	1448.825	60.15909091	61.71875	287.2909091	290.4821429	192.9642
19.5	6.4	1099.155556	1449.645833	58.58	60.34883721	289.9090909	294.3636364	192.9642
19.5	6.4	1099.888889	1449.595238	60.85416667	61.94736842	289.9107143	294.0877193	192.9642
14.85714286	4.614285714	1100.675	1449.425	58.72	60.15789474	286.3584906	290.6909091	147.0203429
7.8	1.9	1034.764706	1452.055556	59.11111111	60.0952381	292.2363636	295.3818182	77.18568
10.4	2.9	1100.081081	1447.738095	57.06521739	59.08108108	295.4444444	299.0178571	102.91424
3.627906977	0.295348837	1100.020408	1450.163265	58.83333333	60.97619048	289.9818182	294.1666667	35.90031628
4	0.438461538	1100.342105	1451.913043	59.68085106	61.60606061	290.4912281	293.5090909	39.5824
39	13.9	1098.978261	1450.548387	59.90909091	62.15625	292.8392857	297	385.9284
20.52631579	6.794736842	1099.4	1448.135135	58.52830189	60.82051282	293.0172414	297.5714286	203.1202105
12	3.515384615	1099.896552	1451.694444	58.33333333	59.89473684	292.5178571	296.877193	118.7472
13	3.9	1099.518519	1447.433333	59.87234043	61.22222222	288.1785714	293.2222222	128.6428
21.08108108	7.008108108	1099.666667	1450.275862	60.04347826	61.175	293.6785714	298.3793103	208.6099459
12.48	3.7	1099.315789	1448.648649	60.04444444	61.61290323	291.4210526	294.3454545	123.497088
12.64864865	3.764864865	1099.485714	1450.189189	58.5	60.16666667	292.3392857	296.3859649	125.1659676
27.13043478	9.334782609	1099.961538	1448.918919	59.91304348	61.23529412	293.4655172	297.7017544	268.4719304
44.57142857	16.04285714	1099.478261	1449.657143	54.04	55.62162162	294.122807	298.5272727	441.0610286
19.5	6.4	1099.434783	1450	53.65306122	55.91666667	294.6181818	297.8928571	192.9642
29.71428571	10.32857143	1099.4	1448.75	59.78723404	61.51162791	291	295.3965517	294.0406857
14.85714286	4.614285714	1099.315789	1449.114286	60.69230769	62.02702703	292.1818182	295.6	147.0203429
33.42857143	11.75714286	1099.535714	1448.972222	59.59183673	61.34146341	291.9056604	295.6181818	330.7957714
17.82857143	5.757142857	1099.684211	1449.409091	60.76	61.83783784	292.3018868	297.3818182	176.4244114
16.59574468	5.282978723	1099.903226	1450.512195	60.48780488	61.97142857	297.8214286	301.877193	164.2248511
14.18181818	4.354545455	1099.6875	1449.457143	60.30434783	61.66666667	298.5660377	304.4509804	140.3376
13.27659574	4.006382979	1099.16	1449.129032	60.39215686	61.87804878	293.8888889	297.5	131.3798809
17.33333333	5.566666667	1099.525	1449.5	60.58695652	61.83333333	288	292.8275862	171.5237333
11.77358491	3.428301887	1099	1449.866667	60.24489796	62.08333333	296.9622642	300.2407407	116.5066868
8.432432432	2.143243243	1098.868421	1448.65625	59.75555556	61.75	292.7818182	296.4814815	83.44397838
16.13793103	5.106896552	1099.625	1449.463415	60.39130435	62.05555556	296.1052632	300.2545455	159.6945103
21.51724138	7.175862069	1099.538462	1449.315789	60.17021277	61.97560976	297.5818182	301.6909091	212.9260138
15.2195122	4.753658537	1099.62069	1450.133333	59.77272727	62.05555556	293.1296296	298.3137255	150.6062049
14.85714286	4.614285714	1099.633333	1449.219512	60.80851064	61.84210526	296.1090909	301.1272727	147.0203429
52	18.9	1099.275862	1449.5	59.46938776	61.11111111	294.8392857	298.2321429	514.5712
14.85714286	4.614285714	1099.933333	1450.878788	58.8125	60.45	293.3773585	297.0350877	147.0203429
14.51162791	4.481395349	1099.823529	1449.551724	55.49019608	58.12121212	292.3636364	296.7636364	143.6012651
16.42105263	5.215789474	1099.666667	1448.75	56.60869565	58.14285714	295.6428571	300.6666667	162.4961684
16.59574468	5.282978723	1100.088235	1449.2	58.55102041	60.97674419	297.754717	302.0943396	164.2248511
7.428571429	1.757142857	1100.064516	1450.941176	58.96	60.5	293.9482759	298.4137931	73.51017143
8.210526316	2.057894737	1099.678571	1448.909091	57.91111111	59.8372093	293.0555556	297.7592593	81.24808421
5.032258065	0.835483871	1099.551724	1449.35	58.73469388	59.5952381	285.4444444	289.2641509	49.7972129
5.473684211	1.005263158	1099.612903	1450.176471	55.72340426	57	294.9814815	297.8545455	54.16538947
7.090909091	1.627272727	1099.413793	1449.735294	53.63265306	55.55	295.1666667	299.3148148	70.1688
8.210526316	2.057894737	1099.142857	1448.444444	57.95833333	59.42105263	294.5555556	299.7222222	81.24808421
7.090909091	1.627272727	1099.545455	1449.757576	58.80487805	60.67647059	290.5517241	294.0714286	70.1688
4.216216216	0.521621622	1099.433333	1449.166667	58.7254902	60.73529412	284.6730769	287.7222222	41.72198919
19.5	6.4	1099.352941	1449.085714	53.97916667	56.42857143	288.5964912	291.6909091	192.9642
19.5	6.4	1099.27907	1449.378378	58.97959184	60.8125	292.4038462	295.3928571	192.9642
39	13.9	1099.928571	1449	59.32692308	60.85	294	297.5686275	385.9284
16.13793103	5.106896552	1099.5	1449.75	58.95918367	60.83333333	291.9814815	296.3859649	159.6945103
8.666666667	2.233333333	1098.926829	1447.97619	58.12	59.775	291.1851852	294.0576923	85.76186667
6.782608696	1.508695652	1100.458333	1450	57.9	59.54761905	290.7777778	295.5660377	67.11798261
29.25	10.15	1099.954545	1447.446809	57.30612245	58.67567568	290.9272727	295.0892857	289.4463
9.176470588	2.429411765	1099.162791	1451.540541	58.84	60.65714286	287.9803922	292.7692308	90.80668235
14.18181818	4.354545455	1099.8	1450.020833	58.11764706	60.26315789	289.0185185	292.1607143	140.3376
10.4	2.9	1099.163265	1449.439024	58.5	59.7027027	291.2363636	295.1041667	102.91424
19.5	6.4	1099.948718	1448.547619	58.70212766	60.64102564	290.3888889	293.2181818	192.9642
11.14285714	3.185714286	1099.702128	1449.888889	58.61702128	60.53658537	288.1403509	292.8	110.2652571
6.24	1.3	1099.615385	1448.404255	57.82	59.79487179	288.2407407	292.4444444	61.748544
26	8.9	1100.146341	1449.142857	57.84090909	59.52777778	285.3333333	288.5	257.2856
8.432432432	2.143243243	1099.880952	1449.583333	57.52083333	58.92682927	290.4210526	292.9636364	83.44397838
15.6	4.9	1098.682927	1450.533333	53.2	54.72972973	287.1666667	290.5344828	154.37136
7.8	1.9	1099.769231	1447.717949	55.42222222	57.15	285.7413793	289.245614	77.18568
6.933333333	1.566666667	1099.627907	1449.209302	55.64583333	57.87179487	289.9622642	292	68.60949333
6.5	1.4	1100.297297	1450.209302	58.14893617	60.05882353	291.5964912	295.8035714	64.3214
20.8	6.9	1099.047619	1448.589744	56.76086957	58.27586207	293.7636364	296.9636364	205.82848
15.29411765	4.782352941	1099.891892	1448.97619	55.72916667	57.20512821	291.4339623	295.5925926	151.3444706
10.4	2.9	1099.621622	1449.5	56.54347826	57.70731707	298.0181818	302.7719298	102.91424
11.14285714	3.185714286	1099.62069	1450.944444	55.85416667	57.87179487	293.2807018	297.4285714	110.2652571
17.33333333	5.566666667	1099.409091	1448.69697	55.42857143	57.65789474	290.8448276	294.7068966	171.5237333
22.28571429	7.471428571	1099.541667	1450.038462	55.62222222	57.53846154	295.362069	299.625	220.5305143
16	5.053846154	1099.571429	1449.59375	56.25	57.92105263	294.9814815	298.462963	158.3296
14.44444444	4.455555556	1099.45	1449.481481	56.15217391	58.16666667	295.2692308	300.2692308	142.9364444
6.5	1.4	1099.5	1449.344828	57.42307692	57.94285714	295.1896552	300.4181818	64.3214
23.11111111	7.788888889	1099.416667	1449.891892	56.36363636	58.47058824	298.245283	303.8518519	228.6983111
12	3.515384615	1099.666667	1449.566667	57.1372549	58.4	296.5535714	301.4909091	118.7472
32.27586207	11.3137931	1099.5	1449.911765	57.59090909	59.76470588	291.8965517	295.9821429	319.3890207
16	5.053846154	1099.366667	1448.866667	58.86956522	60.7	295.7192982	300.3157895	158.3296
10.75862069	3.037931034	1099.263158	1448.290323	58.29787234	59.63157895	294.3090909	298.6181818	106.4630069
15	4.669230769	1099.372093	1449.815789	58.46938776	60.24324324	296.3448276	301	148.434
11.41463415	3.290243902	1099.40625	1449.828571	58.5	59.76086957	296.8571429	301.0181818	112.9546537
9.176470588	2.429411765	1099.606061	1449.744186	57.8	59.89583333	297.75	302.3454545	90.80668235
22.28571429	7.471428571	1099.529412	1449.717949	56.7254902	58.56097561	290.6140351	295.9830508	220.5305143
7.428571429	1.757142857	1099.583333	1449.657895	58.06818182	59.21052632	292.0350877	296.5964912	73.51017143
12.48	3.7	1099.3	1449.45	55.17391304	57.84210526	295.1320755	298.3818182	123.497088
9.75	2.65	1099.551724	1449.029412	57.88095238	59.92682927	286.3518519	291.5454545	96.4821
12.31578947	3.636842105	1099.25	1449.25	57.25	58.94444444	289.2857143	292.9285714	121.8721263
9.176470588	2.429411765	1099.363636	1450.020408	58.45283019	60.25	286.4444444	290.3148148	90.80668235
11.77358491	3.428301887	1099.073171	1449.361111	58.67346939	60.07894737	288.8363636	293.4210526	116.5066868
12.48	3.7	1098.837209	1449.767442	57.95744681	59.44444444	294.2857143	298.037037	123.497088
10.4	2.9	1099.822222	1449.236842	54.33333333	55.84848485	289.8703704	294.7735849	102.91424
11.14285714	3.185714286	1099.355556	1449.055556	54.61702128	55.63414634	289.5	293.2631579	110.2652571
39	13.9	1099.02381	1448.85	54.65384615	56.37837838	292.4821429	297.3888889	385.9284
24	8.130769231	1099.66	1449.795455	61.05769231	62.27027027	299.1320755	303.4727273	237.4944
12.64864865	3.764864865	1099.723404	1449.375	60.27659574	62	293.7454545	297.9245283	125.1659676
12	3.515384615	1099.644444	1449.828571	60.27083333	61.89473684	295.4561404	300.8928571	118.7472
12	3.515384615	1100	1448.560976	60.17073171	62.26470588	290.8181818	293.9038462	118.7472
16.59574468	5.282978723	1099.857143	1449.604651	60.26530612	62.175	288.3518519	293.8888889	164.2248511
11.14285714	3.185714286	1100.114286	1449	60.56862745	62.16666667	297.1929825	300.8214286	110.2652571
13.86666667	4.233333333	1099.97561	1450.472222	60.5625	62.05555556	294.7857143	298.6538462	137.2189867
12.23529412	3.605882353	1099.806452	1449.918919	61	62.2	294.0727273	297.7090909	121.0755765
15.6	4.9	1098.64	1449.5	59.58181818	61.4	290.5272727	294.5555556	154.37136
11.14285714	3.185714286	1098.780488	1448.342105	60.02	61.5	294	297.8928571	110.2652571
11.55555556	3.344444444	1099.368421	1449.852941	60.52083333	62.13888889	293.5087719	298.2321429	114.3491556
19.5	6.4	1099.977273	1449.219512	61.02173913	62.21052632	295.7592593	299.78	192.9642
31.2	10.9	1099.8	1448.292683	61.2244898	61.77777778	297.125	301.2962963	308.74272
31.2	10.9	1100.15	1449.575	59.62222222	61.0625	289.4285714	292.8727273	308.74272
3	0.053846154	1100.162162	1448.638889	59.0625	60.58974359	289.6538462	294.5818182	29.6868
6.782608696	1.508695652	1100.292683	1450.461538	61.01960784	62.03125	289.7735849	293.7857143	67.11798261
27.52941176	9.488235294	1099.75	1449.882353	58.35555556	60.18421053	291.1272727	293.6607143	272.4200471
9.75	2.65	1099.314286	1449.8125	60.25581395	62.09090909	290.122807	294.4909091	96.4821
19.5	6.4	1099.657143	1449.090909	60.88235294	62.21875	287.3214286	291.0862069	192.9642
12.48	3.7	1099.138889	1450.825	60.70588235	62.02777778	293.5	298.0357143	123.497088
12	3.515384615	1099.636364	1448.975	60.19230769	61.78378378	290.7017544	294.3965517	118.7472
39	13.9	1100.058824	1448.976744	58.36170213	59.94444444	289.125	292.6428571	385.9284
15.09677419	4.706451613	1099.441176	1450.675676	58.8627451	60.19512195	289.9285714	293.9642857	149.3916387
12	3.515384615	1099.444444	1448.189189	60.36363636	61.3255814	288.0535714	292.44	118.7472
3.804878049	0.363414634	1100	1449.725	58.32	59.64285714	284.8947368	288.1896552	37.65155122
52	18.9	1100.033333	1449.725	58.30612245	59.85294118	292.0943396	296.8490566	514.5712
11.7	3.4	1099.481481	1448.690476	59.60377358	60.55813953	287.6296296	292.4339623	115.77852
8.666666667	2.233333333	1099.054054	1449.421053	58.06122449	59.55263158	287.7407407	293.037037	85.76186667
7.8	1.9	1099.681818	1447.977273	58.28571429	59.92307692	288.3035714	292.245614	77.18568
15.6	4.9	1100.425	1447.913043	56.25490196	57.90243902	286.2545455	288.1272727	154.37136
18.13953488	5.876744186	1099.878788	1448.378378	58.25531915	59.85416667	289.8181818	294.5272727	179.5015814
23.11111111	7.788888889	1099.62963	1450.605263	59.19230769	60.87234043	287.3090909	292.5535714	228.6983111
19.5	6.4	1099.875	1449.783784	59.68	61.05769231	296.8392857	301.6923077	192.9642
14.85714286	4.614285714	1099.583333	1448.272727	59.19607843	60.625	295.2321429	299.2105263	147.0203429
15.6	4.9	1099.75	1450.785714	58.89583333	60.73684211	295.7037037	298.8727273	154.37136
19.91489362	6.559574468	1099.555556	1449.935484	57.72	59.65957447	296.5849057	301.2857143	197.0698213
26	8.9	1099.384615	1449.421053	59.76	60.875	296.2962963	299.3148148	257.2856
19.91489362	6.559574468	1099.526316	1450.612903	58.74468085	60.47368421	290.8148148	295.7454545	197.0698213
12	3.515384615	1099.47619	1449.6	57.61538462	60.55102041	293.2363636	297.6140351	118.7472
5.571428571	1.042857143	1099.333333	1448.757576	58.98	60.8	298.4509804	302.82	55.13262857
12.73469388	3.797959184	1099.179487	1448.647059	59.09259259	60.14285714	292.6862745	298.4259259	126.0174367
62.4	22.9	1099.307692	1448.542857	58.76595745	60.225	295.3888889	299.8909091	617.48544
13	3.9	1099.375	1448.972222	59.52830189	60.09090909	293.9107143	299.0740741	128.6428
19.5	6.4	1099.081081	1449.707317	58.44444444	61.04081633	295.4909091	298.8909091	192.9642
11.14285714	3.185714286	1099.222222	1448.864865	59.73076923	61.55	287.8214286	292.4363636	110.2652571
5.777777778	1.122222222	1099.244444	1450.159091	58.28301887	61.11111111	286.9642857	292.3888889	57.17457778
15.6	4.9	1100.04878	1449.47619	60.28571429	62.27027027	284.1607143	286.2115385	154.37136
5.379310345	0.968965517	1099.295455	1449.560976	54.53191489	56.26190476	293.1403509	297.0689655	53.23150345
14.18181818	4.354545455	1099.906977	1449.714286	54.77083333	56.51219512	288.1724138	291.3333333	140.3376
3.714285714	0.328571429	1099.568182	1449.02439	53.37735849	54.8372093	296.3148148	300.8823529	36.75508571
10.4	2.9	1099.486486	1449.913043	54.94	56.45945946	288.0740741	290.625	102.91424
39	13.9	1099.295455	1448.135135	58.29411765	60.675	291.5438596	296.4444444	385.9284
8.432432432	2.143243243	1099.244898	1449.44186	56.35849057	58.03846154	292.3214286	296.9454545	83.44397838
20.34782609	6.726086957	1100.170732	1449.105263	56.69387755	58.47058824	292.5090909	297.3035714	201.3539478
7.8	1.9	1100.621622	1449.317073	58.78431373	60.08	294.4909091	298.2641509	77.18568
5.032258065	0.835483871	1099.615385	1448.682927	57.2826087	59.35555556	296.5438596	300.7407407	49.7972129
8.914285714	2.328571429	1100.229167	1449.166667	58.7755102	60.83783784	289.7192982	293.8392857	88.21220571
12	3.515384615	1099.863636	1448.575	58.95744681	61.09375	290.7924528	294.7090909	118.7472
17.33333333	5.566666667	1100.27451	1449.318182	60.38	61.94736842	291.0961538	295.3818182	171.5237333
39	13.9	1099.761905	1448.5	60.22222222	61.625	291.8214286	296.9074074	385.9284
14.18181818	4.354545455	1099.714286	1450.242424	58.02040816	59.95454545	294.1016949	297.9285714	140.3376
12	3.515384615	1099.931034	1449.944444	54.7755102	56.6969697	301	306.5	118.7472
17.33333333	5.566666667	1099.586207	1449.035714	57.96	59.775	296.0535714	300.0877193	171.5237333
15.91836735	5.02244898	1099.5	1449.448276	57.41176471	58.69444444	293.1818182	297.3818182	157.5217959
14.18181818	4.354545455	1099.84	1449.648649	54.48	55.93939394	292.4545455	296.8421053	140.3376
4.333333333	0.566666667	1099.551724	1448.65625	58.94117647	60.86842105	293.1886792	297.6666667	42.88093333
19.5	6.4	1100.066667	1449.90625	58.63265306	60.19512195	295.7272727	300.3636364	192.9642
16	5.053846154	1099.5	1449.388889	59.44680851	60.61363636	293.7068966	298.8333333	158.3296
24.63157895	8.373684211	1099.208333	1449.785714	59.95744681	61.58333333	294.7272727	299.1454545	243.7442526
9.176470588	2.429411765	1099.148148	1448.652174	53.33928571	55.625	300.1964286	304.4912281	90.80668235
6.24	1.3	1099.375	1448.794118	54.07142857	55.50943396	289.6111111	293.5090909	61.748544
6.782608696	1.508695652	1099.56	1449.30303	55.94545455	55.9137931	290.8571429	294.2222222	67.11798261
6.24	1.3	1099.457143	1449.194444	57.81481481	62.04651163	293.1428571	298.1666667	61.748544
13	3.9	1099.75	1450.447368	58.18518519	59	292.8965517	296.6607143	128.6428
15.6	4.9	1099.404762	1448.944444	55.71698113	56.21818182	290.4385965	295.1551724	154.37136
12	3.515384615	1099.942857	1449.677419	56.28571429	57.76363636	292.4181818	295.9298246	118.7472
16.71428571	5.328571429	1100.294118	1448.948718	54.71929825	56.6	289.4814815	293.3684211	165.3978857
10.4	2.9	1099.564103	1449.621622	55.6	56.0754717	291.6078431	295.7068966	102.91424
156	58.9	1098.941176	1449.090909	51.26666667	53.125	291.1666667	295.8392857	1543.7136
6.5	1.4	1099.425	1449.026316	57.875	59.3125	287.8679245	291.0363636	64.3214
3	0.053846154	1098.55	1446.918919	57.96296296	59.45714286	291.962963	296.75	29.6868
13.27659574	4.006382979	1100.704545	1447.65	54.53846154	55.92307692	290.5789474	293.7321429	131.3798809
156	58.9	1099.511628	1449.545455	55.53061224	57.2972973	293.32	295.5818182	1543.7136
5.777777778	1.122222222	1100.5	1449.113636	59.14285714	60.94285714	289.7017544	293.5438596	57.17457778
22.28571429	7.471428571	1099.777778	1448.047619	55.55319149	57.02439024	291.8703704	295.9298246	220.5305143
78	28.9	1100.170732	1448.875	53.63043478	56	294.9310345	299.5438596	771.8568
3.9	0.4	1099.025641	1450.847826	53.81632653	55.64705882	290.7321429	294.8928571	38.59284
14.18181818	4.354545455	1100.052632	1448.690476	57.2745098	58.95121951	288.7368421	292.5263158	140.3376
11.14285714	3.185714286	818.5510204	1451	58.95833333	60.5	292.754386	296.6481481	110.2652571
12	3.515384615	1097.588235	1450.380952	58.11363636	59.75675676	292.7777778	296.7192982	118.7472
6.782608696	1.508695652	1099.05	1447.533333	58.36170213	59.875	290.8148148	296.94	67.11798261
10.75862069	3.037931034	1099.853659	1449.926829	60.91666667	62.77142857	293.8	298.4259259	106.4630069
62.4	22.9	1099.6	1449.552632	56.87234043	58.23809524	291.5964912	295.0357143	617.48544
4.105263158	0.478947368	1099.5	1449.758621	57	57.675	290.9285714	294.8035714	40.62404211
8.068965517	2.003448276	1099.5	1450.25	57.66037736	59.04444444	291.4821429	294.4642857	79.84725517
7.090909091	1.627272727	1099.666667	1449.677419	58.4	59.63829787	286.8070175	291.6842105	70.1688
11.55555556	3.344444444	1099.464286	1449.090909	58.66666667	60.19565217	290.4259259	294.3928571	114.3491556
13	3.9	1099.681818	1449.763158	53.09433962	55.14583333	294.6481481	299.0535714	128.6428
7.8	1.9	1099.5	1449.285714	54.27083333	56.1025641	281.245614	284.4464286	77.18568
39	13.9	1099.464286	1449.357143	49.30769231	50.86363636	290.4736842	294.7678571	385.9284
78	28.9	1099.470588	1449.111111	49.53061224	51.37837838	290.3928571	296.1428571	771.8568
3.391304348	0.204347826	1099.72093	1449.547619	45.4893617	48.05128205	292.9814815	297.6206897	33.5589913
22.28571429	7.471428571	1099.931818	1450.177778	47.83333333	48.975	292.8703704	295.1636364	220.5305143
29.25	10.15	1098.6	1450.5625	47.60869565	48.6097561	289.5614035	293.3703704	289.4463
14.71698113	4.560377358	1099.8	1450.090909	47.35416667	48.62162162	292.4561404	296.6491228	145.6333585
24.63157895	8.373684211	1099.552632	1448.731707	50.93023256	52.47368421	291.6551724	295.6842105	243.7442526
20.52631579	6.794736842	1100	1450.52381	50.87755102	53.33333333	288.8571429	293.8245614	203.1202105
19.5	6.4	1099.9375	1449.731707	52.95918367	54.04878049	291.5555556	296.5454545	192.9642
5.379310345	0.968965517	1099.461538	1450.527778	49.16326531	50.73809524	291.6607143	296.4736842	53.23150345
7.428571429	1.757142857	1099.324324	1449.27027	49.51020408	51.35897436	292.0925926	297.4	73.51017143
31.2	10.9	1099.5625	1448.888889	52.03773585	53.18604651	292.0566038	296.9122807	308.74272
6.782608696	1.508695652	1099.242424	1449.341463	52.02083333	54.23684211	293.4909091	298.1071429	67.11798261
5.379310345	0.968965517	1098.854167	1449.285714	54.91666667	56.31578947	289.5535714	295.1454545	53.23150345
15.6	4.9	1100.021277	1448.658537	60.92307692	61.94444444	291.2857143	295.877193	154.37136
3.058823529	0.076470588	1099.684211	1449.947368	62.15384615	63.625	296.9272727	301.6981132	30.26889412
5.886792453	1.164150943	1100.113636	1449.175	61.39622642	63.6097561	290.3636364	295.6071429	58.2533434
14.18181818	4.354545455	1100.142857	1449.842105	61.46808511	62.5	290.1296296	294.6545455	140.3376
10.75862069	3.037931034	1100	1449.666667	62.11538462	63.17948718	289.6037736	294.6037736	106.4630069
6.782608696	1.508695652	1099.621622	1449.921053	54.6875	56.83783784	288.7192982	292.4210526	67.11798261
5.032258065	0.835483871	1099.26087	1449.769231	55.55319149	57.9047619	287.6964286	292.3333333	49.7972129
13.37142857	4.042857143	1099.409091	1448.527778	56.56862745	58.76315789	297.5576923	302	132.3183086
15.6	4.9	1099.642857	1449.69697	52.42592593	54.65853659	294.7407407	299.38	154.37136
52	18.9	1099.463415	1449.228571	58.28571429	59.84615385	296.2857143	301.2727273	514.5712
6.367346939	1.348979592	1098.893617	1449.517241	58.52941176	60.44736842	291.462963	297.0727273	63.00871837
14.18181818	4.354545455	1099.644444	1449.147059	56.60416667	58.33333333	288.6727273	293.2727273	140.3376
6.5	1.4	1099.5	1448.967742	55.46	56.71052632	298.0545455	302.6326531	64.3214
5.571428571	1.042857143	1099.974359	1449.47619	56.52083333	58.25	295.0727273	300.3518519	55.13262857
39	13.9	1099.818182	1449.27027	55.74509804	57.39534884	292.2807018	298.1090909	385.9284
52	18.9	1099.837838	1449.526316	64.57446809	65.9	289.4827586	293.3508772	514.5712
13.68421053	4.163157895	1099.641026	1449.162791	65.8627451	67.1	283.5892857	287	135.4134737
12.73469388	3.797959184	1100.037037	1449.588235	65.39534884	67.51428571	289.1296296	294.245614	126.0174367
13.37142857	4.042857143	1099.567568	1450.315789	66.375	66.94117647	287.8928571	291.637931	132.3183086
15	4.669230769	1099.314286	1448.966667	65.56	67.33333333	290.6792453	294.7636364	148.434
7.8	1.9	1100.172414	1449.205128	65.75555556	67.31428571	289.3076923	293.6730769	77.18568
14.71698113	4.560377358	1099.709677	1449.483871	63.53658537	65	291.9818182	296.6153846	145.6333585
14.18181818	4.354545455	1099.642857	1449.931034	65.94117647	67.48	288.0181818	292.1607143	140.3376
8.432432432	2.143243243	1099.258065	1450.125	65.64444444	67.13513514	290.2678571	294.9310345	83.44397838
18.72	6.1	1098.947368	1449.378378	65.59090909	67.02564103	288.6964286	291.2941176	185.245632
4.105263158	0.478947368	1099.121951	1448.85	63.20512821	64.13888889	286.9818182	291.6481481	40.62404211
8.666666667	2.233333333	1099	1449.052632	63.31372549	65.03225806	285.0175439	287.7142857	85.76186667
52	18.9	1099.292683	1450.026316	62.23076923	63.82051282	289.6727273	293.6785714	514.5712
4.105263158	0.478947368	1099.153846	1449.078947	65.7826087	67.63636364	290.5517241	293.9807692	40.62404211
52	18.9	1099.804878	1448.974359	65.47058824	67.29411765	295.2222222	298.8363636	514.5712
24	8.130769231	1099.232558	1449.972973	65.93478261	67.47058824	298.0178571	302.5185185	237.4944
6.5	1.4	1099.54	1448.930233	65.63829787	67.47058824	296.1666667	299.6851852	64.3214
12.48	3.7	1100.022727	1448.755556	65.62790698	66.89189189	299.122807	303.2592593	123.497088
17.33333333	5.566666667	1099.825	1449.384615	63.15909091	65.94285714	292.9122807	296.245614	171.5237333
4.588235294	0.664705882	1100.179487	1449.088889	65.55102041	66.83333333	292.7894737	295.1818182	45.40334118
17.33333333	5.566666667	1099.625	1449.358974	64.17391304	65.42857143	288.7272727	291.9821429	171.5237333
4.216216216	0.521621622	1099.685714	1450.142857	65.57446809	67.23529412	294.3518519	298.3090909	41.72198919
5.672727273	1.081818182	1099.583333	1449.25	64.84444444	66.28571429	292.3846154	295.1551724	56.13504
5.571428571	1.042857143	1099.314286	1449.375	64.40425532	65.83870968	291.7454545	295.9298246	55.13262857
7.428571429	1.757142857	1099.675676	1449.297297	62.97959184	64.55555556	289.2982456	293.4727273	73.51017143
5.2	0.9	1099.5	1449.973684	65.47058824	67.16666667	295.32	299.1538462	51.45712
14.18181818	4.354545455	1099.576923	1449.972222	65.04081633	66.48387097	298.6111111	302.0185185	140.3376
18.72	6.1	1099.76	1450.641026	49.52	50.62790698	292.4210526	296.4310345	185.245632
5.777777778	1.122222222	1099.473684	1449.547619	48.55769231	50.43181818	295.0784314	298.7678571	57.17457778
18.90909091	6.172727273	1099.521739	1449.666667	48.72916667	50.34090909	291.2280702	295.2982456	187.1168
39	13.9	1099.409091	1449.75	49.36538462	50.53488372	290.5454545	295.122807	385.9284
14.625	4.525	1099.5	1449.833333	49.4375	50.8974359	290.1272727	294.8727273	144.72315
7.255813953	1.690697674	1099.294118	1448.857143	46.62745098	49.43478261	287.4655172	290.5892857	71.80063256
22.28571429	7.471428571	1099.529412	1449.448276	46.52	48.54545455	289.5789474	293.7857143	220.5305143
7.090909091	1.627272727	1099.5	1449.5	49.95454545	53.48888889	289.2037037	291.9122807	70.1688
12.73469388	3.797959184	1099.473684	1450.058824	68.89583333	69.5	294.9655172	299.1818182	126.0174367
39	13.9	1099.193548	1449	64.92156863	66.26190476	295.9090909	298.9811321	385.9284
10.75862069	3.037931034	1099.432432	1449.25	66.23076923	67.28301887	294.2857143	298.5185185	106.4630069
44.57142857	16.04285714	1099.518519	1448.902439	67.73076923	68.96078431	289.8703704	295.5964912	441.0610286
3.466666667	0.233333333	1099.771429	1449.475	66.07142857	67.80434783	289.0909091	292.0517241	34.30474667
52	18.9	1098.71875	1450.2	65.09433962	66.96296296	295.6730769	300.1607143	514.5712
62.4	22.9	1100.387097	1448.8	67.77586207	68.4375	296.3571429	300.125	617.48544
9.551020408	2.573469388	1099.611111	1451.069767	65.45454545	67.60869565	290.3703704	295.4230769	94.51307755
18	5.823076923	1099.119048	1449	66.2244898	67.48717949	292	294.8392857	178.1208
39	13.9	1099.075	1449.761905	65.07407407	66.025	290.9122807	295.4814815	385.9284
4	0.438461538	1100.085714	1448.795455	67.51162791	68.33333333	288.375	290.9814815	39.5824
8.210526316	2.057894737	1100.675676	1449.714286	66.88	68.45454545	291.3571429	294.3090909	81.24808421
2.888888889	0.011111111	1099.575758	1450.479167	66.43396226	67.25	292.9444444	296.3333333	28.58728889
7.428571429	1.757142857	1098.971429	1450.09375	64.77358491	66.83636364	292.2807018	296.2	73.51017143
3.804878049	0.363414634	1099.55814	1449.111111	65.02040816	68.45098039	291.9444444	297.1206897	37.65155122
10.63636364	2.990909091	1099.577778	1449.47619	65.21153846	65.66	293.5087719	295.4035088	105.2532
6.117647059	1.252941176	1099.78125	1449.560976	66.33928571	66.11538462	293.7192982	297.7884615	60.53778824
19.5	6.4	1099.466667	1449.794872	57	58.51282051	289.1481481	292.1964286	192.9642
12.48	3.7	1099.454545	1448.729167	54.47916667	56.22222222	293.7068966	297.2068966	123.497088
11.34545455	3.263636364	1099.304348	1450.133333	55.67924528	57.52272727	291.6481481	297.1886792	112.27008
9.176470588	2.429411765	1099.25	1449.761905	56.33333333	57.71428571	294.4035088	299.3448276	90.80668235
6	1.207692308	1099.041667	1449.222222	55.8	58.14634146	290.0178571	294.1851852	59.3736
7.428571429	1.757142857	1099.531915	1449.195122	55.4893617	56.95121951	291.3518519	296.9272727	73.51017143
7.609756098	1.826829268	1100.333333	1449.894737	55.94117647	57.25641026	294.0545455	296.877193	75.30310244
11.14285714	3.185714286	1099.756098	1449.142857	55.76470588	58.05263158	289.5	294.0357143	110.2652571
14.51162791	4.481395349	1099.365854	1448.857143	55.34615385	57.6097561	291.7818182	295.2264151	143.6012651
18	5.823076923	1099.666667	1448.714286	55.66666667	57.64864865	294.0892857	298.9107143	178.1208
19.5	6.4	1099.6	1450.282051	55.02	57.67391304	291.3333333	295.0714286	192.9642
17.33333333	5.566666667	1099.772727	1449.40625	55.96363636	57.67391304	291.9482759	297.2631579	171.5237333
42.54545455	15.26363636	1099.703704	1449.84375	55.71698113	56.9787234	292.3793103	295.8965517	421.0128
6.782608696	1.508695652	1099.242424	1449.195122	55.70588235	57.46341463	292.4909091	293.6296296	67.11798261
13.27659574	4.006382979	1099.117647	1448.756757	55.75555556	57.7804878	294.0535714	298.9473684	131.3798809
11.14285714	3.185714286	1099.390244	1449.771429	54.38	56.02564103	295.5263158	300.5714286	110.2652571
16.13793103	5.106896552	1098.888889	1449.694444	56.47826087	57.61904762	291.7169811	294.2264151	159.6945103
9.176470588	2.429411765	1100.216216	1449.102564	55.4375	56.95348837	289.3018868	292.9285714	90.80668235
24	8.130769231	1099.805556	1449.823529	54.91489362	56.94444444	290.2727273	293.3035714	237.4944
2.943396226	0.032075472	1099.866667	1449.340909	56.14893617	57.12	297.0545455	301.7894737	29.1266717
6.5	1.4	1099.923077	1448.659091	55.98039216	57.58139535	294.9285714	300.1964286	64.3214
6	1.207692308	1099.375	1449.413043	56.2745098	57.17948718	293.1818182	297.0740741	59.3736
28.36363636	9.809090909	1100.375	1450.536585	55.22	56.87234043	290.8181818	293.7857143	280.6752
20.12903226	6.641935484	1100.152174	1449.388889	55.59183673	57.6097561	293.6	298.5263158	199.1888516
5.571428571	1.042857143	1100.268293	1449.772727	54.97674419	57.18181818	288.7142857	290.8148148	55.13262857
8.666666667	2.233333333	1099.977273	1450.108108	55.32692308	56.9047619	288.5	292.8214286	85.76186667
6	1.207692308	1099.315789	1449.147059	54.88461538	57.16666667	291.4363636	293.8545455	59.3736
3.12	0.1	1099.585366	1449.195122	55.48979592	57	294.8928571	299.4807692	30.874272
11.14285714	3.185714286	1099.243243	1449.589744	54.41304348	55.76315789	293.6785714	297.7413793	110.2652571
13	3.9	1099.794118	1448.973684	52.54716981	54.23255814	291.1403509	294.8965517	128.6428
11.14285714	3.185714286	1100.097561	1449.170732	52.20833333	53.39534884	286.6545455	289.9454545	110.2652571
7.428571429	1.757142857	1100.230769	1449.527778	52.88235294	54.87234043	290.0517241	293.0535714	73.51017143
14.51162791	4.481395349	1099.833333	1451.086957	53.42	54.85365854	294.4716981	295.9122807	143.6012651
22.28571429	7.471428571	1100	1449.906977	52.93617021	54.825	290.2857143	293.0925926	220.5305143
5.379310345	0.968965517	1099.657895	1449.125	53.42553191	54.33333333	291.5614035	294.5740741	53.23150345
8.830188679	2.296226415	1100.139535	1449.547619	53.04166667	55.32608696	295.5263158	299.9074074	87.38001509
24	8.130769231	1099.6	1450.071429	55.38	56.975	292.7413793	296.9824561	237.4944
52	18.9	1099.461538	1448.783784	55.82	57.35	295.2	298.8421053	514.5712
31.2	10.9	1099.565217	1448.071429	55.63829787	57.58536585	292.1052632	295.0892857	308.74272
26	8.9	1099.590909	1450.255814	54.05882353	56.76595745	294.1052632	297.8103448	257.2856
12	3.515384615	1099.5	1449.2	52.8	54.625	296.7142857	301.245614	118.7472
52	18.9	1099.526316	1448.423077	53.08163265	55.66666667	290.5614035	294.2982456	514.5712
6.782608696	1.508695652	1099.416667	1449.268293	56.29787234	57.43181818	293.3275862	297.6666667	67.11798261
22.28571429	7.471428571	1099.6	1450.425	54.90566038	56.375	288.75	292.8392857	220.5305143
14.18181818	4.354545455	1099.433333	1449.232558	51.66666667	52.57777778	294.7142857	298.8214286	140.3376
15.6	4.9	1099.428571	1449.117647	50.88888889	52.37209302	290.375	294.122807	154.37136
6	1.207692308	1099.028571	1448.885714	54.34	55.98	290.6964286	295.8571429	59.3736
9.551020408	2.573469388	1100.057143	1449	55.27659574	56.6	292.125	295.5964912	94.51307755
7.609756098	1.826829268	1099.478261	1449.555556	55.06	56.41463415	289.0363636	291.5185185	75.30310244
13.27659574	4.006382979	1099.125	1448.621622	56.28888889	57.3	290.962963	296	131.3798809
6.782608696	1.508695652	1100.242424	1449.409091	54.26	55.825	290.2181818	295.4444444	67.11798261
9.454545455	2.536363636	1099.297297	1449.609756	51.04	52.58974359	290.877193	294.9285714	93.5584
14.85714286	4.614285714	1099.512821	1449.974359	53.1372549	54.18604651	291.2181818	295.0185185	147.0203429
5.886792453	1.164150943	1099.485714	1449.125	56.08510638	57.71428571	291.5862069	295.2857143	58.2533434
78	28.9	1098.731707	1449.756757	55.11764706	56.93617021	290.5789474	296.7924528	771.8568
14.18181818	4.354545455	1099.634146	1448.882353	55.48148148	58.21276596	292.5	296.490566	140.3376
11.55555556	3.344444444	1099.222222	1449.585366	55.77083333	57.33333333	292.3333333	296.1481481	114.3491556
6.638297872	1.453191489	1099.081081	1449.547619	56.26530612	58	291	295.3508772	65.68994043
12	3.515384615	1099.861111	1448.72093	55.68518519	57.02564103	287.4181818	291.7192982	118.7472
21.27272727	7.081818182	1099.818182	1449.690476	56.13461538	57.86842105	292.5344828	297.1403509	210.5064
8.210526316	2.057894737	1099.022727	1450.105263	56.82608696	57.0952381	297.6545455	301.7454545	81.24808421
15.6	4.9	1098.659574	1448.615385	55.2	56.68181818	291.877193	296.2807018	154.37136
17.82857143	5.757142857	1099.692308	1449.282609	55.97916667	57.48837209	293.1818182	297.4821429	176.4244114
11.14285714	3.185714286	1099.622222	1448.851064	56.32	57.5	294.5686275	298.5357143	110.2652571
19.5	6.4	1100.095238	1450	54.86	56.54166667	292.6727273	298.2982456	192.9642
9.176470588	2.429411765	1100.176471	1448.55102	56.875	57.6875	292.1052632	295.6727273	90.80668235
15.6	4.9	1098.892857	1451.425	56	57.61904762	292.2777778	296.037037	154.37136
9.176470588	2.429411765	1100.282609	1448.311111	55.9375	57.71428571	294.8909091	299.75	90.80668235
11.77358491	3.428301887	1100.361702	1450.555556	56.12	57.79487179	294.2407407	298.3392857	116.5066868
11.34545455	3.263636364	1099.396226	1450.97561	56.95833333	58.06976744	291.8448276	295.25	112.27008
11.7	3.4	1099.264151	1449.486486	53.27272727	55.68085106	292.6785714	296.490566	115.77852
10.94736842	3.110526316	1100.325	1449.634146	56.26415094	57.56	295.9454545	300.7017544	108.3307789
6.638297872	1.453191489	1099.861111	1449.404762	56.56	57.75	294.755102	299.5471698	65.68994043
14.85714286	4.614285714	1100	1449.487805	55.54901961	57.73913043	294.3214286	299.8846154	147.0203429
15.91836735	5.02244898	1100	1449.209302	56.36734694	57.86666667	298.7592593	304.25	157.5217959
12	3.515384615	1099.592593	1450.297297	56.73076923	57.69767442	294.3888889	299.7222222	118.7472
6.638297872	1.453191489	1099.357143	1450.05	56.04255319	57.48717949	293.4642857	298.2545455	65.68994043
10.75862069	3.037931034	1099.34375	1448.315789	57.17307692	57.68292683	289.0350877	292.2857143	106.4630069
17.33333333	5.566666667	1099.4	1449.195122	56.64	57	287.8103448	290.6607143	171.5237333
6.24	1.3	1099.25	1449.677419	56.46808511	57.51282051	289.6037736	293.5087719	61.748544
12.73469388	3.797959184	1099.448276	1451	55.83018868	57.91111111	294.1481481	298.0178571	126.0174367
6.782608696	1.508695652	1099.27027	1448.789474	56.7755102	57.90909091	290.5178571	294.362069	67.11798261
6.24	1.3	1100.133333	1448.894737	56.60377358	57.29166667	294.4423077	298.8545455	61.748544
9.75	2.65	1100	1450.545455	54.82	56.82051282	294.6078431	298.68	96.4821
7.255813953	1.690697674	1099.978723	1449.763158	54.85416667	56.7	290.5714286	294.1896552	71.80063256
13	3.9	1098.6	1449.55814	56.35416667	58.12820513	293.75	297.8163265	128.6428
11.14285714	3.185714286	1099.090909	1448.837838	56.88679245	57.38095238	292.5818182	296.4285714	110.2652571
2.785714286	-0.028571429	1099.702703	1448.511111	55.34042553	56.95454545	295.0576923	299.2352941	27.56631429
11.14285714	3.185714286	1099.74359	1448.155556	55.16	56.5106383	294.2	299.3272727	110.2652571
5.032258065	0.835483871	1099.825	1450.190476	56	57.475	293.2727273	298.8181818	49.7972129
39	13.9	1099.470588	1449.243902	55.44	58	291.4181818	296.6785714	385.9284
5.886792453	1.164150943	1099.861111	1449.695652	55.25531915	56.22727273	290.7857143	294.7368421	58.2533434
12.48	3.7	1099.710526	1449.282609	55.05769231	57.08163265	294.0576923	298.2884615	123.497088
9.75	2.65	1099.612903	1449.547619	56.06	58.06666667	289.2857143	293.8301887	96.4821
26	8.9	1099.692308	1448.97619	55.67307692	57.45652174	286.8070175	290.5438596	257.2856
9.176470588	2.429411765	1100.205128	1449.02439	54.14285714	56.53488372	288.9636364	292.8214286	90.80668235
11.14285714	3.185714286	1099.545455	1450.085714	54.54166667	55.84444444	290.5471698	295.2413793	110.2652571
46.8	16.9	1099.682927	1450.155556	55	56.89361702	289.2181818	293.2807018	463.11408
13.86666667	4.233333333	1099.5	1449.2	55.23404255	56.61904762	297.0357143	301.5925926	137.2189867
5.032258065	0.835483871	1099.380952	1449.390244	54.94339623	56.28205128	291.1666667	297.2982456	49.7972129
10.75862069	3.037931034	1099.611111	1449.625	53.65306122	55.53658537	291.6785714	293.8070175	106.4630069
8.509090909	2.172727273	1099.642857	1449.452381	55.33962264	57.14	290.1090909	294.9818182	84.20256
12.73469388	3.797959184	1099.526316	1449.666667	55.29411765	56.95348837	292.1090909	296.0188679	126.0174367
12.48	3.7	1099.545455	1449.536585	55.32	56.25	292.5660377	295.9814815	123.497088
52	18.9	1099.590909	1450.075	53.5	56.11904762	287.1525424	291.6785714	514.5712
31.2	10.9	1099.611111	1449.447368	55.07407407	57.08510638	293.0350877	295.8703704	308.74272
24.63157895	8.373684211	1098.962963	1449.190476	50.96153846	52.4375	290.8596491	294.8928571	243.7442526
78	28.9	1100.34375	1448.717949	54.92307692	56	289.8965517	293.8421053	771.8568
14.85714286	4.614285714	1099.233333	1450.783784	54	55.62222222	288.7222222	292.6153846	147.0203429
33.42857143	11.75714286	1100.04	1449.414634	54.42	55.47727273	289.862069	293.3859649	330.7957714
8.666666667	2.233333333	1099.153846	1449.666667	50.64583333	52.95454545	290.9821429	296.1428571	85.76186667
11.34545455	3.263636364	1098.918919	1448.384615	50.32692308	51.45652174	291.7678571	295.637931	112.27008
44.57142857	16.04285714	1099.2	1448.487179	49.7755102	52.51162791	291.1785714	295.3684211	441.0610286
20.8	6.9	1099.897436	1449.468085	50.69811321	52.39534884	293.1730769	298.1132075	205.82848
52	18.9	1099.297297	1450.848485	50.26530612	52.43902439	291.9137931	294.8035714	514.5712
17.72727273	5.718181818	1099.382353	1449.021739	49.7	51.52083333	285.8333333	290.6842105	175.422
6.5	1.4	1100.033333	1449.232558	50.41176471	51.875	289.3684211	292.1785714	64.3214
7.255813953	1.690697674	1099.542857	1450.84	54.95652174	56.74418605	290.5178571	294.0363636	71.80063256
10.88372093	3.086046512	1099.592593	1449.1	55.08	57.04878049	289.7321429	293.5517241	107.7009488
2.785714286	-0.028571429	1099.564103	1449.948718	54.74509804	56.86956522	288.5357143	292.7222222	27.56631429
17.33333333	5.566666667	1099.631579	1449.432432	55.70833333	56.93181818	288.0689655	293.4285714	171.5237333
7.609756098	1.826829268	1099.418605	1449.578947	54.76086957	57.09302326	291.5925926	295.4107143	75.30310244
10.4	2.9	1099.153846	1449.769231	55.2244898	57.06382979	288.8888889	293.0178571	102.91424
20.34782609	6.726086957	1098.769231	1449.131579	55	56.95238095	291.7090909	297.9074074	201.3539478
12.48	3.7	1099.404255	1450.0625	56.17777778	56.51162791	292.9622642	296.8103448	123.497088
15.09677419	4.706451613	1099.465116	1448.860465	55.11538462	56.7173913	298.34	303.6	149.3916387
6.117647059	1.252941176	1100.133333	1448.222222	51.44897959	53.44186047	295.0188679	299.462963	60.53778824
7.090909091	1.627272727	1100.244444	1449.357143	53.08	54.45714286	291.3859649	293.8793103	70.1688
11.14285714	3.185714286	1099.594595	1449.952381	52.44680851	54.71111111	291.6428571	295.7017544	110.2652571
8.666666667	2.233333333	1099.703704	1449.538462	54.08928571	55.5	288.6607143	292.3090909	85.76186667
13.76470588	4.194117647	1099.521739	1450.289474	53.72340426	55.39583333	295.4909091	300.25	136.2100235
12	3.515384615	1099.516129	1449.761905	54.85185185	57.04255319	288.0350877	291.9137931	118.7472
10.88372093	3.086046512	1098.804878	1448.65	55.66666667	57.3	290.75	295.0784314	107.7009488
8.914285714	2.328571429	1098.822222	1449.431818	54.23404255	56	289.6724138	294.3050847	88.21220571
4	0.438461538	1100.090909	1449.560976	55.32075472	56.64444444	290.5964912	294.9122807	39.5824
52	18.9	1099.375	1450.24	55.04	56.06976744	291.5357143	295.0701754	514.5712
[truncated: 5,714 more rows]
