# Supplementary material for: Optimization of Process Control Parameters for Fully Mechanized Mining Face Based on ANN and GA
Source: Comput Intell Neurosci. 2021 May 25;2021:5557831. doi: 10.1155/2021/5557831 (PMC8169252; doi:10.1155/2021/5557831)
Supplement: Supplementary Materials — The three supplementary data files provided in this paper are obtained by our laboratory. Data 1 is dataset 1 used in the paper; it contains all the historical production data of the key process control parameters of each production equipment collected by the sensors at the production site of the fully mechanized mining face. Data 2 is dataset 2 used in the paper which is filtered from dataset 1 to train and test the model in the paper. Data 3 is the operating trajectory data of the shearer. [file 5557831.f1.zip › data2.csv]

PSS	HSMS	CSSC	CSSL	EPOP1	EPOP2	SPOP1	SPOP2	OCPM
8.979976373	3	1140	1455	69.94444444	72.08163265	286.9245283	289.2909091	88.8622542
7.347253396	2.5	785	990	71.18421053	73.50980392	287.0384615	287.6785714	72.70548071
14.61989954	3.5	636.4285714	1455	70.79545455	73.01960784	285.5272727	286.1052632	144.6726779
10.49587048	2	1008	1455	69.61111111	72.05454545	287.6727273	291.4482759	103.862936
11.47849104	2.5	960	1455	68.38461538	70.73584906	284.4736842	286.7586207	113.5865559
9.385002927	3	840	1455	68.45	70.80851064	286.7321429	289.1964286	92.87023496
10.95877708	2.5	1020	1455	69.2	71.40816327	284.5090909	284.5090909	108.4436745
14.57474772	4.5	948	1455	67.54285714	69.8490566	281.3571429	285.9473684	144.2258735
10.27994113	3	1155	1455	69.23913043	71.69811321	269.490566	273.637931	101.7261854
9.237564387	3	978	1455	72.67391304	74.96363636	275.8	281.7719298	91.41124215
11.45258523	3	1032	1455	70.38235294	72.53703704	288.3529412	294.7966102	113.3302025
11.2976532	3	942	1455	75.65853659	77.40740741	305.2105263	311.6	111.797057
9.181278629	3	1020	1455	76.13043478	78.58823529	265.2075472	269.0566038	90.8542608
10.0668476	2.5	1080	1455	75.375	77.87272727	300.0188679	303.5344828	99.61749708
9.431242804	2.5	920	1455	75.27777778	77.70588235	293	295	93.32780629
12.41690825	3	1032	1455	76.23076923	78.39622642	289.7346939	290.82	122.8727573
8.881649429	2	985	1297.5	70.175	72.19565217	305.1	308.4693878	87.88925009
13.21706717	4	1032	1297.5	74.97435897	77.12727273	271.9285714	276.7368421	130.7908098
11.57837847	3	1005	1455	70.25	72.56603774	276.2363636	277.1929825	114.575002
10.20840937	3	967.5	1455	73.69230769	75.14814815	284.0714286	286.5263158	101.0183357
10.68688124	3	840	1455	72.07692308	74.25	289.3636364	292.1206897	105.753102
8.037544902	2	1026	1455	73.31481481	74.30188679	287.6666667	289.0178571	79.53632933
6.884055244	2	1140	1416.666667	74.97619048	77.17391304	289.9464286	293.3333333	68.12185708
13.23991634	4	1125	1450	72.7755102	75.23529412	268.4285714	275.4210526	131.0169161
11.31806957	3	960	1455	72.75	75.32692308	287.7678571	289.7857143	111.9990892
10.87919964	3	1008	1455	70.82608696	72.3877551	294.0877193	297.8421053	107.656208
10.49589128	3	1008	1455	72.01818182	73.80392157	287.7592593	293.0350877	103.8631418
11.52378697	3	1020	1455	73.19607843	74.21568627	289.4285714	297.8103448	114.0347864
10.57958136	3	890	1455	73.5	75.75510204	291.1818182	292.5087719	104.6913053
8.757055821	2.5	1032	1455	77.6097561	79.87755102	290.0545455	295.9649123	86.65632159
13.7052589	4	975	1455	71.84	75.66	278.8269231	279.5263158	135.62176
12.82566518	3	950	1455	72.38	75.04166667	293.7857143	297.0175439	126.9176523
12.71270867	3	810	1455	71.24489796	73.90384615	276.0181818	280.875	125.7998799
6.96724357	2	1050	1455	74.18367347	76.42	285.4444444	289.0892857	68.94505547
8.663803812	2	975	1455	74.16363636	76.09615385	286.9433962	290.2142857	85.733537
10.40124034	3	947.1428571	1455	70.64705882	72.38297872	297.6415094	297.6428571	102.9265139
7.837566785	2	970	1455	71.85365854	74	281.7090909	285.6140351	77.55742588
10.46791077	3	795	1455	76.21153846	78.36538462	281.6545455	286.3793103	103.5862578
10.32038404	2.5	583.125	786.9230769	73.20930233	75.68627451	278.1666667	278.6666667	102.1263923
9.253770104	3	1155	786.9230769	74.31372549	76.96296296	271.5964912	272.877193	91.57160744
6.6608412	2	834	1440	74.84782609	77.49019608	272.8392857	273.137931	65.91302018
10.28917571	3	1050	1440	73.38461538	76.35714286	282.9591837	285.1346154	101.8175671
10.87592616	3	831.4285714	1440	71.04	72.6122449	284.6923077	287.7272727	107.6238149
10.10421659	2.5	981.8181818	1440	70.90196078	73.32	289.8148148	295.1964286	99.98728569
10.30663099	3.5	1035	1440	70.84615385	73.28846154	284.0877193	289.6206897	101.9902976
10.18006473	3	975	1440	71.41304348	74.37037037	283.0535714	284.8245614	100.7378485
11.50509453	3	980	1440	71.16326531	73.29090909	273.9821429	277.3508772	113.8498134
10.8792216	3	918	1440	70.18518519	72.13207547	277.6785714	280.0677966	107.6564253
10.87592616	3	918	1440	71.87234043	74.5106383	288.4528302	294.2678571	107.6238149
7.543395997	2	1005	1440	69.47916667	72.53846154	282.2962963	286.8070175	74.64642943
10.27994113	3	1140	1455	69.96153846	73.32653061	284.6666667	287.0701754	101.7261854
8.916264212	3	916.3636364	1455	76.58974359	79.16	282.875	285.1929825	88.23178413
8.082605122	2	825	1455	72.01886792	73.52830189	292.25	294.6785714	79.98222725
10.2148495	3	945	1455	70.96153846	73.19607843	286.3148148	286.8363636	101.0820647
9.176470588	2	937.5	1455	72.54901961	75.54716981	297.25	270.8448276	90.80668235
10.06451613	3	1005	1455	69.81632653	72.44897959	278.8823529	281.2407407	99.59442581
12	3.5	925	1455	69.11111111	72.27083333	277.1132075	281.9298246	118.7472
12	3.5	990	1455	73.85714286	75.87234043	283.2692308	285.6851852	118.7472
14.18181818	4	1155	1455	69.93333333	71.09615385	283.0208333	284.0816327	140.3376
11.14285714	3	1050	1455	70.42	72	272.78	277.5357143	110.2652571
10.75862069	3	882.8571429	1455	70.90909091	71.8	284	285.4716981	106.4630069
7.255813953	2	1110	1455	71.32653061	74.26530612	284.8421053	288.3389831	71.80063256
10.06451613	3	924	1455	73.02040816	75.4375	271.5384615	275.6491228	99.59442581
15.09677419	4	1155	1157.142857	73.96153846	76.88235294	282.1521739	282.4081633	149.3916387
13	4	717.2727273	1455	74.03921569	76.82352941	291.9615385	294.5272727	128.6428
10.4	3	856.875	1455	71.70833333	75.01923077	288.4909091	289.8245614	102.91424
9.551020408	3	795	1455	72.62	74.6122449	284.5185185	285.9272727	94.51307755
8.666666667	2	587.5	1455	75.28888889	77.6122449	285.2608696	286.6923077	85.76186667
13.37142857	4	795	1455	74.9245283	76.05769231	286.6181818	287.5517241	132.3183086
10.4	3	1000	1455	72.40816327	74.4	283.9814815	287.2857143	102.91424
9.176470588	3	1110	1455	72.875	74.20833333	286.5740741	290.3090909	90.80668235
10.06451613	3	972.8571429	1470	73.13461538	75.15686275	292.7105263	293.7948718	99.59442581
10.06451613	3	698.8235294	1450	77.17307692	80.33962264	279.6607143	281.25	99.59442581
12.73469388	3.5	763.6363636	1450	71.41666667	73.72222222	287.1470588	290.7105263	126.0174367
7.428571429	2	920	1455	73.68627451	76.30769231	281.2727273	284.2727273	73.51017143
10.75862069	3	915	1455	72.26	74.42553191	279	284.7586207	106.4630069
11.14285714	3	795	1455	71.87234043	75.15686275	279.0943396	280.8518519	110.2652571
10.4	3	906	1455	72.59183673	73.66666667	274.88	279.1052632	102.91424
13.92857143	4	985	1440	73.18518519	76.25	278.5098039	280.8888889	137.8315714
14.85714286	4	1155	1440	72.50980392	74.48148148	258.6909091	265.8474576	147.0203429
12	3.5	948	1455	73.66666667	75.64	271.754717	278.1929825	118.7472
10.88372093	3	900	1455	72.35416667	75.55769231	266.4693878	275.2280702	107.7009488
12.31578947	3.5	795	1455	73.2	75.15686275	266.0576923	271.6065574	121.8721263
12	3.5	975	1455	71.97916667	74.88461538	271.2075472	277.362069	118.7472
9.75	3.5	915	1455	73.19565217	76.0625	262.375	268.2909091	96.4821
13	4	975	1455	72.6122449	75.46	260.8039216	263.637931	128.6428
13.68421053	4	586.875	803.0769231	74.76470588	76.62	276.2857143	278.2352941	135.4134737
12	3.5	1155	803.0769231	72.44230769	74.95833333	272.0384615	277.0350877	118.7472
14.18181818	4	925	1455	75.49019608	76.93877551	266.7843137	272.2982456	140.3376
7.428571429	2	990	1455	74.12	76.46938776	259.6862745	266.0350877	73.51017143
12.48	3.5	945	1455	74.94117647	77.07843137	254.5178571	260.3728814	123.497088
6.933333333	2	795	1455	54.1875	56.58823529	282.4285714	284.5957447	68.60949333
10.4	3	712.5	1143.75	61.24	64.30952381	281.3636364	283.9074074	102.91424
14.18181818	4	795	1143.75	67.70212766	68.68181818	278.5740741	279	140.3376
11.7	3.5	930	1143.75	59.6	62.15555556	277.7692308	277.9090909	115.77852
8.210526316	2	877.5	1110	57.43902439	59.5	280.4363636	282.2105263	81.24808421
12.64864865	3.5	1020	1110	51.38095238	53.27083333	281.6071429	284.1551724	125.1659676
12.23529412	3.5	953.3333333	1110	53.88888889	55.64583333	276.6923077	280.125	121.0755765
11.55555556	3	870	1440	55.19512195	58.17307692	284.0363636	283.7037037	114.3491556
10.17391304	3	964.6153846	1455	56	59.10416667	285.3076923	288.3962264	100.6769739
14.18181818	4	1090	1455	54.73170732	57.2	286.627451	287.9811321	140.3376
11.14285714	3	936	1455	50	51.74	283.9636364	286.8392857	110.2652571
14.18181818	4	1110	1440	57.3125	58.48	272.212766	272.4821429	140.3376
10.75862069	3	985	1455	54.73076923	56	284.3928571	286.4655172	106.4630069
10.63636364	3	910	1455	55	57.29166667	282.8679245	283.3962264	105.2532
10.4	3	938.5714286	1455	55.92	58.74	289.6666667	292.1607143	102.91424
14.85714286	4	960	1455	52.26666667	55.43137255	279.2941176	278.625	147.0203429
12	3.5	951.8181818	1455	56	58.9787234	285.3928571	286.4385965	118.7472
10.88372093	3	908.5714286	1455	54.46938776	56.09803922	279.5892857	280.375	107.7009488
13.56521739	4	976.3636364	1455	55.32608696	57.6	287.0188679	286	134.2359652
12	3	970	1455	54.59574468	58.7	282.9444444	282.6428571	118.7472
10.4	3	930	1455	57.42222222	59.24	258.9807692	258.877193	102.91424
9	2	945	1455	54.25	57.01923077	278.3571429	279.3571429	89.0604
7.090909091	2	810	1455	55.20408163	58.34693878	294.9019608	294.6428571	70.1688
12	3.5	996	1455	53.02173913	56.08695652	281	282.1132075	118.7472
14.51162791	4	900	1455	55.65116279	58.38095238	284.4259259	284.5454545	143.6012651
13.76470588	4	1080	1455	55.8	58.10638298	284.1090909	284.2711864	136.2100235
13.27659574	4	970	1455	55.20754717	57.35294118	289.4117647	289.5686275	131.3798809
13.37142857	4	1155	1455	55.9375	57.26923077	260.254902	261.7758621	132.3183086
14.18181818	4	942.8571429	1455	67.35555556	69.58823529	256.88	263.0535714	140.3376
11.7	3	882	1455	64.82	67.22916667	274.627451	277.7037037	115.77852
12.64864865	3.5	942.8571429	1455	64.73170732	67.15217391	277.9019608	280.7962963	125.1659676
13.56521739	4	980	1455	65.71428571	67.80851064	279.4761905	281.3877551	134.2359652
12.48	3.5	952.5	1455	66.13953488	68.39583333	266.9423077	271.5263158	123.497088
13.76470588	4	954.5454545	1455	65.48888889	67.68085106	271.0185185	276.6315789	136.2100235
12.23529412	3.2	1140	1455	65.85365854	68	268.9814815	273.0862069	121.0755765
10.4	3	938.5714286	1455	65.11363636	67.3877551	271.4727273	275.8275862	102.91424
8.210526316	2	924	1455	65.0952381	67.24	260.9636364	269	81.24808421
12	3.5	948.75	1455	65.09090909	67.4893617	276.3846154	278.6785714	118.7472
13	4	952.5	1455	64.94444444	67.10416667	263.7962963	268.5862069	128.6428
13	4	925	1455	72.74509804	75.60465116	244.9230769	246.8214286	128.6428
13	4	844.2857143	1455	70.70212766	71.76744186	262.462963	269.7241379	128.6428
9.454545455	2.5	837	1161	66.39130435	68.59183673	278.2641509	280.1111111	93.5584
9.176470588	2.5	1155	1455	66.57142857	68.57142857	278.6153846	280.4821429	90.80668235
15.09677419	4	990	1455	73.4	75	284.6851852	292.6034483	149.3916387
15.09677419	4	967.5	1440	72.43478261	74.84090909	274.3018868	277.245283	149.3916387
10.4	3	960	1440	72.53333333	74.84782609	282.372549	284.0384615	102.91424
12	3.5	923.3333333	1440	72.39215686	75.27083333	275.8392857	281.0740741	118.7472
14.18181818	4	1125	1440	72.34883721	74.46938776	279.1666667	281.8727273	140.3376
10.17391304	3	960	1455	68.0625	72.16	276.4259259	277.0689655	100.6769739
9.75	3	936.6666667	1455	73.61904762	76.13333333	277.3076923	278.6851852	96.4821
9.75	3	905	1455	76.74468085	79.525	283	283.7368421	96.4821
13.56521739	4	1027.5	1455	73.65909091	75.29166667	281.5272727	283.4067797	134.2359652
14.625	4	870	1455	76	78.63265306	283.3518519	284.6964286	144.72315
12	3.5	990	1455	76.37777778	78.68888889	283.9423077	285.4150943	118.7472
12.48	3.5	930	1455	76.8372093	78.89130435	286.3272727	286.5438596	123.497088
10.88372093	3	795	1455	76.91111111	79.15909091	287.28	289.7037037	107.7009488
12	3.5	975	1455	76.86046512	78.69047619	288.7307692	288.6415094	118.7472
10.4	3	1155	1455	68.1025641	69.97297297	278.1041667	279.537037	102.91424
6.782608696	2	900	1455	67.75	70.1627907	283.5185185	283.8448276	67.11798261
8.666666667	2	1032	1455	68.675	71.07317073	287.037037	288.3103448	85.76186667
12.73469388	3.5	940	1455	73.42553191	75.82608696	279.6181818	280.5	126.0174367
13.86666667	4	975	1455	71.86956522	74.27083333	287.4545455	289.1071429	137.2189867
13.56521739	4	1050	1410	69.96078431	72.80769231	284.3571429	285.2413793	134.2359652
12.64864865	3.5	1155	1410	51.33333333	55.79487179	284.3818182	287.1481481	125.1659676
13.37142857	4	1090	1440	71.80952381	74.47368421	260.745098	261.3103448	132.3183086
12.48	3.5	946.3636364	1455	69.44230769	71.96078431	258.1851852	259.0350877	123.497088
11.14285714	3	612.3529412	1425	69	71.11538462	293.7727273	296.0952381	110.2652571
12	3.5	942	1425	68.7	71.68	291.3333333	292.9375	118.7472
8.830188679	3	955	1455	69.10204082	72	289.8	290.675	87.38001509
12.31578947	3.5	1155	1087.5	68.71153846	71.41509434	291.1132075	291.7413793	121.8721263
13.27659574	4	960	1087.5	66.45833333	70.1	286.0612245	286.7924528	131.3798809
13.37142857	4	922.5	1455	67.03773585	69.71428571	277.2857143	279.2	132.3183086
10.75862069	3	1065	1455	68.30612245	70.46938776	282.7037037	284.754386	106.4630069
10.4	3	1155	1455	68.78	71.33333333	286.8679245	288.1034483	102.91424
7.428571429	2	764	1455	66.64705882	68.78846154	283.5961538	284.0181818	73.51017143
9.957446809	3	955	1455	68.02	70.66	277.3773585	279.0677966	98.53491064
8.432432432	2	951.8181818	1455	69.11538462	72	284.1304348	285.46	83.44397838
11.55555556	3	694.2857143	872.3076923	69.10416667	70.46938776	278.0754717	279.7931034	114.3491556
14.18181818	4	1155	1455	63.63461538	66.27083333	283.8703704	285.1578947	140.3376
11.7	3.5	600	777.8571429	66.16216216	68.23255814	284.754717	285.5	115.77852
12.48	3.5	985	1455	69.93877551	71.81632653	282.4117647	282.1730769	123.497088
12.73469388	3.5	1005	1455	69.66666667	72.82352941	287.8076923	288.4814815	126.0174367
9.454545455	3	940.9090909	1455	69.82222222	71.95744681	281.0980392	282.1071429	93.5584
11.7	3.5	702.8571429	780	72.23529412	74.26923077	283.2407407	283.7454545	115.77852
13.86666667	4	1070	1425	72.25925926	73.16	290.9038462	291.6862745	137.2189867
13	4	1155	1425	72.52	74.34	280.7272727	280.9152542	128.6428
12.48	3.5	957.5	1455	73.27777778	76.11320755	280.1454545	280.9473684	123.497088
11.14285714	3	771.8181818	1290	68.22222222	71.05882353	283.3333333	284.1666667	110.2652571
14.625	4	1155	1290	67.15686275	69.16	279.5272727	280.9642857	144.72315
11.7	3	950	1455	71.44897959	73.2244898	289.3333333	289.8909091	115.77852
12	3.5	870	1455	69.52272727	72.28301887	288.0877193	288.877193	118.7472
10.75862069	3	697.5	1455	70.52941176	71.65957447	282.5454545	284.7272727	106.4630069
12.64864865	3.5	1100	1425	68.2244898	70.88	284.4716981	285.4909091	125.1659676
14.85714286	4	1150	1455	66.32653061	69.46	278.9038462	279.0961538	147.0203429
9	2	975	1440	70.28	73	285.3571429	285.8392857	89.0604
11.77358491	3.5	985	1455	68.4	70.54166667	277.8163265	282.3333333	116.5066868
11.77358491	3.5	925.7142857	1455	69.08695652	71.57142857	279.3333333	280.627451	116.5066868
10.88372093	3	1032	1455	71.37209302	73.86666667	275.6666667	276.8421053	107.7009488
14.18181818	4	747.5	1470	66	69.25	280.8703704	285.5892857	140.3376
9	2.5	793.6363636	1440	67.87755102	69.94	280.4339623	284.5263158	89.0604
11.55555556	3	930	1440	68.375	70.64	290.2156863	291.14	114.3491556
15.2195122	4	995	1440	70.09615385	72.53846154	282.74	286.4814815	150.6062049
14.18181818	4	1090	1254	53.9	55.66037736	272.1754386	272.3333333	140.3376
11.7	3.5	1008	1455	74.09433962	76.24	280.0943396	281.6346154	115.77852
12	3.5	603.75	1312.5	65.7173913	68.08510638	275.0925926	276.5	118.7472
12.48	3.5	932.7272727	1312.5	71.73076923	74.21276596	280.6727273	281.9464286	123.497088
13.27659574	4	945	1455	72.17073171	74.65217391	288.4117647	290.3653846	131.3798809
13	4	1155	1455	70.02040816	73.65306122	280.64	282.5576923	128.6428
13.56521739	4	888.75	1455	67.19607843	69.52173913	296.2264151	297.4909091	134.2359652
12.48	3.5	975	1455	67.06818182	69.34	286.2352941	287.875	123.497088
13.68421053	4	1155	1455	66.925	69.84782609	283.877551	286.3018868	135.4134737
9.957446809	3	985	1455	75.37209302	78.06	292.5416667	293.8301887	98.53491064
8.666666667	3	943.6363636	1455	61.42	63.19148936	298.3333333	298.3181818	85.76186667
8.914285714	2.5	925.7142857	750	50.37837838	52.88636364	280.58	281.875	88.21220571
13	4	915	1455	54.4375	57.08695652	287.2340426	287.44	128.6428
12	3.5	960	1455	54.5	56.57692308	287.1794872	288.2368421	118.7472
14.18181818	4	601.875	1410	54.96969697	56.98	291.6666667	292.8070175	140.3376
13	4	955	1180	54.56756757	56.76190476	286.9642857	288.3333333	128.6428
11.55555556	3	1000	1180	58.27777778	60.35294118	285.7777778	285.0925926	114.3491556
12	3.5	938.5714286	1235	55.47368421	57.34	263.9814815	264.6964286	118.7472
10.88372093	3	940.7142857	1455	56.66666667	59.18367347	285.0754717	285.8214286	107.7009488
13.37142857	4	915	1455	68.26086957	70.80851064	285.9215686	287.6730769	132.3183086
9.176470588	3	795	1455	69.37735849	70.9	283.62	285.6792453	90.80668235
10.17391304	3	930	1455	74.30769231	76.82222222	278.3396226	280.4909091	100.6769739
11.14285714	3	1005	1275	53.72093023	55.98113208	282.5925926	282.7719298	110.2652571
9.454545455	3	1140	1440	73.25	75	283.8363636	284.5925926	93.5584
12.48	3.5	1155	1440	56.7254902	59.73913043	275.4	276.1090909	123.497088
9.551020408	3	610.5882353	1182.857143	60.76595745	62.21052632	276.6363636	277.3392857	94.51307755
7.93220339	2	950	1185	72.25490196	72.39215686	274.5471698	277.1071429	78.49391186
12.23529412	3.5	1140	1440	74.75471698	75.7037037	282.0740741	284.9482759	121.0755765
12	3.5	601.875	792.8571429	75.06382979	75.88	289.75	291.6363636	118.7472
11.14285714	3	653.5714286	962.1428571	72.59615385	74.41666667	277.6315789	278.3103448	110.2652571
7.090909091	2	1155	962.1428571	74.38636364	76.46938776	283.4339623	284.4464286	70.1688
7.609756098	2	812.7272727	870	72.64705882	74.01960784	285.8392857	289.4912281	75.30310244
9.75	3	940.9090909	1455	73.47058824	74.92592593	275.9090909	280.4745763	96.4821
14.18181818	4	945	1455	71.42	72.42307692	281.5555556	284.3928571	140.3376
14.625	4	975	1455	70.48076923	72.83333333	282.4821429	286.5517241	144.72315
10.4	3	1155	1455	75	76.93617021	271.7924528	278.6315789	102.91424
12	3.5	1140	1440	70.96	72.77777778	287.5405405	286.974359	118.7472
8	2	729.2307692	1440	70.65306122	72.56603774	276.3859649	279.2166667	79.1648
11.7	3.5	1140	750	76.65384615	78.06122449	281.4363636	283.2105263	115.77852
9.36	3	930	1455	73.59259259	75.47272727	280.037037	280.5964912	92.622816
11.14285714	3	947.5	1455	72.69811321	73.71153846	280.2909091	281.6491228	110.2652571
9.36	3	990	1455	75.20754717	76.45283019	285.4464286	287.4827586	92.622816
10.06451613	3	905	1455	70.72222222	71.2	285.0377358	285.9642857	99.59442581
11.55555556	3	970	1455	73.12	75.8627451	281.5925926	283.7586207	114.3491556
11.7	3.5	863.3333333	1455	76.39534884	77.89361702	277.9074074	279.0847458	115.77852
12.48	3.5	720	1001.538462	71.62745098	73.92307692	283.3035714	283.5	123.497088
9.454545455	3	915	1001.538462	71.88372093	73.57777778	280.7407407	281.3207547	93.5584
12.64864865	3.5	951.8181818	1470	70.53061224	72.66666667	259.1071429	259.8474576	125.1659676
11.7	3.5	1005	1440	73.26666667	74.97916667	274.625	275.2631579	115.77852
10.4	3	852	1053.75	72.47619048	74.18	278.1964286	279.5	102.91424
12.31578947	3.5	903.75	1053.75	74.23255814	75.90196078	277.2777778	278.5789474	121.8721263
9.75	3	1072.5	1053.75	69.85714286	71.81632653	278.6428571	281.2586207	96.4821
11.77358491	3.5	630	773.0769231	72.39130435	74.25531915	274.8909091	277.1578947	116.5066868
12.48	3.5	1155	773.0769231	71.93478261	73.93333333	276.0545455	280.3103448	123.497088
13	4	996	1290	71.54545455	74.50980392	267.7636364	270.5263158	128.6428
10.17391304	3	1155	1290	76.56818182	78.8627451	270.6666667	270.8148148	100.6769739
12.31578947	3.5	921.4285714	1210	67.75510204	70.52941176	275.9107143	268.6666667	121.8721263
12.64864865	3.5	810	966	66.81578947	68.71153846	277.9433962	280.0350877	125.1659676
10.88372093	3	594.375	1455	78.80392157	81.57142857	279.2545455	281.9152542	107.7009488
12.48	3.5	950	1455	78.65454545	81.05263158	286.1296296	286.8103448	123.497088
10.06451613	3	905	1455	81.35087719	78.80701754	282.8214286	284.8421053	99.59442581
8.914285714	2.5	978	1455	77.69642857	72.2	279.1964286	280.3859649	88.21220571
8.830188679	2	945	1455	73.58823529	76.25454545	279.2982456	281.0701754	87.38001509
12.31578947	3.5	1007.142857	1455	74.10204082	75.31372549	280.7017544	284.1896552	121.8721263
12.48	3.5	840	1455	75.8627451	78.21428571	280.5263158	284.0677966	123.497088
7.8	2	965	1455	75.08333333	77.53191489	287.6	289.8148148	77.18568
13.86666667	4	907.5	1157.142857	64.86666667	57.35294118	277.7894737	279.2807018	137.2189867
10.88372093	3	1110	1157.142857	63.28571429	86.95454545	280.5714286	283.8421053	107.7009488
12.48	3.5	902.1428571	1455	62.01754386	91.21428571	282.1296296	283.8148148	123.497088
13.37142857	4	918	1455	63.27272727	60.425	279.3888889	282.5263158	132.3183086
12	3.5	965	1455	63.83928571	63.73684211	282.9454545	286.1785714	118.7472
8.666666667	2	934.2857143	1455	62.63636364	62.88888889	281.0740741	283.7818182	85.76186667
8.666666667	2	626.25	836	73.63829787	74.86	275.9464286	277.6666667	85.76186667
13	4	1155	1455	69.73076923	71.44680851	281.75	283.3157895	128.6428
13.86666667	4	585	820.7142857	66.60606061	69.70212766	279.6037736	283.2105263	137.2189867
13.56521739	4	1155	820.7142857	72.475	75.63414634	282.3333333	283.25	134.2359652
12	3.5	1170	1455	70.74358974	74.5	271.6607143	277.3448276	118.7472
11.14285714	3	1140	1455	68.97916667	72.03921569	278.1929825	279.3103448	110.2652571
13	4	628.125	1410	68.80769231	71.08510638	281.5961538	283.4	128.6428
9.75	3	952.5	1455	69.28070175	70.58	277.8113208	278.037037	96.4821
7.609756098	2	1140	892	74.39473684	75.87179487	274.2678571	275.6842105	75.30310244
13.86666667	4	1155	892	69	70.85365854	281.06	281.5555556	137.2189867
14.18181818	4	947.5	892	68.78125	71.54761905	279.2982456	280.0172414	140.3376
13.56521739	4	1155	892	68.76	71.18867925	282.9272727	283.8070175	134.2359652
11.14285714	3	1110	1455	70.40816327	72.70588235	266.1730769	269.137931	110.2652571
12.31578947	3.5	970	1455	67.44897959	70.03921569	284.3529412	284.0357143	121.8721263
12.31578947	3.5	1155	1455	67.98076923	70.47169811	282.1851852	282.6964286	121.8721263
10.63636364	3	1008	1446	69.86956522	71.26530612	278.6037736	280.1052632	105.2532
13.56521739	4	1155	1455	67.46	69.82	276.0892857	276.8571429	134.2359652
10.75862069	3	900	1455	66.5	69.44897959	284.7254902	287.36	106.4630069
12	3.5	793.3333333	1455	69.9	71.79166667	273.5555556	274	118.7472
12	3.5	790	1455	70.35	72.67346939	279.3157895	281.0526316	118.7472
9	2.5	918.75	1455	70.18181818	72.52830189	289.5102041	289.0740741	89.0604
12.31578947	3.5	962.7272727	1455	70.69047619	73.04	279.4727273	280.9122807	121.8721263
11.41463415	3	947.5	1455	69.93478261	71.92307692	280.8	282.0877193	112.9546537
8.432432432	2	925	1455	71.02040816	73.61111111	278.16	279.7169811	83.44397838
12	3.5	995	1455	67.65957447	70.38461538	280.1785714	282.3965517	118.7472
15.2195122	4	1027.5	1455	70.11764706	71.98076923	282.3272727	283.137931	150.6062049
13	4	1155	1455	63.63829787	64.97826087	273.2641509	278.4655172	128.6428
11.14285714	3	1140	1122.857143	70.8	71.47368421	283.3090909	284.0892857	110.2652571
8.666666667	2	1110	1122.857143	76.30434783	77.30769231	286.5636364	287.75	85.76186667
6.367346939	2	1155	1122.857143	76.91304348	78.08333333	280.5818182	282.0925926	63.00871837
11.55555556	3	831.8181818	1063.636364	77.45714286	78.46341463	283.3333333	284.8245614	114.3491556
12.64864865	3.764864865	1099.478261	1449.675676	55.25581395	56.82608696	292.3214286	299.3888889	125.1659676
20.52631579	6.794736842	1099.591837	1449.194444	56.02380952	57.85714286	295.2222222	298.537037	203.1202105
14.51162791	4.481395349	1099.777778	1449.823529	56.32432432	57.92	293.5892857	297.75	143.6012651
13	3.9	1099.5	1449.512821	55.52380952	57.33333333	292.9811321	296.7735849	128.6428
15.09677419	4.706451613	1099.5	1450.029412	53.73170732	55.375	291.4038462	296.0740741	149.3916387
18.90909091	6.172727273	1099.682927	1449.176471	53.82222222	55.56666667	295.1132075	299.9811321	187.1168
10.75862069	3.037931034	1099.348837	1448.9	53.76315789	55.76	292.8888889	297.9814815	106.4630069
13.37142857	4.042857143	1099.52381	1449.74359	53.70731707	55.68421053	294.0363636	299.2181818	132.3183086
16.25	5.15	1099.5	1449.433333	52.29787234	54.08695652	292.7142857	297.6481481	160.8035
17.33333333	5.566666667	1099.35	1449.961538	53.43902439	55.2	295.25	300.2075472	171.5237333
8.914285714	2.328571429	1099.48	1449.128205	58.48837209	60.125	294.1111111	299.4230769	88.21220571
18.57142857	6.042857143	1099.228571	1449.657143	60.46153846	61.96774194	293.8392857	299.0178571	183.7754286
15.91836735	5.02244898	1099.311111	1449.324324	60.08695652	62	293	297.5925926	157.5217959
9.75	2.65	1099.742857	1449.860465	60.23529412	61.95454545	293.4444444	298.5090909	96.4821
12.48	3.7	1099.6	1448.976744	60.09302326	62.3	294.1454545	298.6111111	123.497088
10.63636364	2.990909091	1099.734694	1449.444444	60.28205128	61.95454545	290.9636364	297.0740741	105.2532
11.7	3.4	1099.560976	1449.95122	60.3	62.14285714	294.6727273	299.6071429	115.77852
9	2.361538462	1099.324324	1449.243902	59.56521739	61.5862069	295.7037037	300.6666667	89.0604
11.7	3.4	1099.692308	1449.894737	59.34090909	61.20689655	293.9056604	298.6491228	115.77852
14.85714286	4.614285714	1099.526316	1450.032258	58.94594595	60	291.7777778	297.3272727	147.0203429
19.5	6.4	1099.428571	1449.027027	56.27272727	58.06666667	295.6363636	299.9259259	192.9642
17.33333333	5.566666667	1099.405405	1449.225	58.62222222	60.45454545	290.1346154	295.9821429	171.5237333
13	3.9	1099.638889	1449.959184	58.79545455	61.35714286	291.4363636	296.7272727	128.6428
13	3.9	1099.655172	1449.225	59.725	61.26666667	292.3018868	296.76	128.6428
10.17391304	2.813043478	1099.8125	1449.9	55.47619048	57.26086957	294.7307692	298.9019608	100.6769739
15.6	4.9	1099.971429	1449.390244	52.94594595	54.88	293.4727273	299.1296296	154.37136
18.35294118	5.958823529	1099.815789	1449.868421	53.2	54.95454545	295.4545455	300.7924528	181.6133647
11.14285714	3.185714286	1099.7	1449.632653	55.6	57.76470588	293.2727273	297.2321429	110.2652571
9.75	2.65	1099.611111	1449.962963	56.66666667	58.54545455	292.6363636	298.5818182	96.4821
12	3.515384615	1099.709677	1449.942857	57.4893617	59.22580645	295.6111111	299.509434	118.7472
16.42105263	5.215789474	1099.688889	1449.534884	53.30769231	55.03333333	295.8	296.8909091	162.4961684
14.18181818	4.354545455	1099.560976	1449.489362	52.175	53.91666667	293.7222222	298.2909091	140.3376
11.14285714	3.185714286	1099.84375	1449.785714	53.48648649	55.39130435	293.4807692	297.3571429	110.2652571
12	3.515384615	1099.942857	1449.025641	53.25714286	54.90909091	292.8113208	297.6363636	118.7472
13.27659574	4.006382979	1099.566667	1449.108696	53.46153846	55.5862069	291.0408163	296.1454545	131.3798809
9.75	2.65	1099.432432	1449.44186	53.81578947	55.5	295	300.1509434	96.4821
16.42105263	5.215789474	1099.410256	1449.952381	52.85	54.67741935	295.2777778	298.6181818	162.4961684
13	3.9	1099.657143	1449.390244	52.70454545	54.86363636	295.6909091	298.5576923	128.6428
9.176470588	2.429411765	1099.642857	1449.27027	53.07142857	54.88461538	293.6111111	297.2142857	90.80668235
17.82857143	5.757142857	1099.705882	1449.555556	52.39130435	54.06896552	294.9245283	298.6909091	176.4244114
17.33333333	5.566666667	1099.470588	1449.2	52.25531915	53.96666667	293.1886792	297.7222222	171.5237333
10.4	2.9	1099.527778	1449.25641	57.31707317	59	295.8545455	299.3928571	102.91424
13.76470588	4.194117647	1099.411765	1449.463415	57.13513514	58.77777778	295.5660377	299.3214286	136.2100235
11.41463415	3.290243902	1099.538462	1449.372093	56.75	58.46666667	294.8363636	299.3148148	112.9546537
12	3.515384615	1099.9375	1449.0625	58.71428571	60.75	293.6078431	298.3518519	118.7472
11.55555556	3.344444444	1099.921053	1448.913043	59.63829787	61.58823529	293.3571429	297.0384615	114.3491556
12.48	3.7	1099.5	1449.342857	58.97674419	60.36363636	294.8545455	298.8363636	123.497088
12	3.515384615	1099.375	1449.122449	60.48717949	62.38095238	293.2181818	297.5961538	118.7472
13	3.9	1099.71875	1449.422222	60.15555556	61.96875	293.962963	298.5454545	128.6428
9.454545455	2.536363636	1099.805556	1449.076923	57.41666667	59.32653061	293.7735849	298.8148148	93.5584
9.176470588	2.429411765	1099.586207	1449.209302	58.07843137	59.35714286	293.8846154	297.7647059	90.80668235
13	3.9	1099.542857	1449.704545	56.12	58.05660377	294.8301887	298	128.6428
8.666666667	2.233333333	1099.451613	1449.421053	60.2	61.30769231	293.9814815	297.0357143	85.76186667
9.75	2.65	1099.266667	1449.166667	58.22727273	60.51428571	293.7192982	298.7857143	96.4821
11.14285714	3.185714286	1099.787234	1449.340909	58.14285714	59.81481481	294.9615385	300.1272727	110.2652571
15.6	4.9	1099.540541	1449.232558	59.16216216	60.66666667	293.6071429	297.0526316	154.37136
20.8	6.9	1099.777778	1449.276596	55.71111111	57.41935484	292.1111111	296.1785714	205.82848
11.14285714	3.185714286	1099.72093	1449	55.25531915	56.89285714	294.6181818	298.037037	110.2652571
8.666666667	2.233333333	1099.390244	1449.390244	56.20833333	57.47368421	295.037037	298.2222222	85.76186667
12.23529412	3.605882353	1099.705882	1449.175	58.02325581	59.87096774	294.462963	296.3636364	121.0755765
13.56521739	4.117391304	1099.583333	1449.472222	55.48717949	57.33333333	294.5714286	297.8928571	134.2359652
12	3.515384615	1099.45	1448.971429	56.90566038	58.67567568	292.7931034	295.862069	118.7472
9.454545455	2.536363636	1099.631579	1449.282051	57.2826087	58.9375	294.5636364	298.4285714	93.5584
9.36	2.5	1099.617647	1449.222222	58.02631579	59.94285714	295.8928571	299.1818182	92.622816
8.914285714	2.328571429	1099.774194	1449.457143	59.14583333	61.34615385	292.3103448	297.7636364	88.21220571
10.75862069	3.037931034	1099.829268	1449.485714	58.91891892	60.8	293.0769231	297.2	106.4630069
9.551020408	2.573469388	1099.72	1449.170732	59.61363636	61.39393939	292.0943396	297.0181818	94.51307755
20.8	6.9	1099.558824	1449.217391	59.7	61.48148148	293.6315789	297.6363636	205.82848
13.56521739	4.117391304	1099.857143	1449.230769	60.06	61.44117647	294	298.0689655	134.2359652
16.42105263	5.215789474	1099.35	1449.515152	57.7173913	59.10714286	293.4561404	298.0185185	162.4961684
16.13793103	5.106896552	1099.658537	1449.923077	59.97727273	61.35294118	294.0714286	297.8703704	159.6945103
12.48	3.7	1099.552632	1449.651163	55.59090909	57.10344828	294.0526316	298.3090909	123.497088
12	3.515384615	1099.795918	1449.842105	55.48837209	57.78378378	294.0178571	297.2068966	118.7472
13.27659574	4.006382979	1099.777778	1449.288889	58.95555556	60.7037037	291.7169811	296.0545455	131.3798809
12.73469388	3.797959184	1099.431818	1449.516129	55.56862745	57	293.5384615	298.3035714	126.0174367
14.85714286	4.614285714	1099.5	1449.375	58.37777778	60.35714286	293.2545455	296.5555556	147.0203429
8.830188679	2.296226415	1099.933333	1449.5	56.68181818	58.18181818	293.754386	298.6037736	87.38001509
12.48	3.7	1099.558824	1450.033333	57.36585366	59.28571429	292.0545455	294.7857143	123.497088
9.176470588	2.429411765	1099.461538	1449.282051	59.31818182	61.66666667	293.9272727	297.3928571	90.80668235
16.42105263	5.215789474	1099.935484	1449.166667	59.43478261	61.25	293.0714286	297.8947368	162.4961684
17.33333333	5.566666667	1099.735294	1449.8	60.20408163	61.80645161	293.8928571	297.3090909	171.5237333
14.625	4.525	1099.631579	1449.647059	60.18181818	62.21428571	293.7586207	297.2982456	144.72315
8.666666667	2.233333333	1099.363636	1449.34375	58.59574468	60.51282051	293.6545455	297.5714286	85.76186667
19.5	6.4	1099.233333	1449.45	60.36363636	62.48387097	294.9622642	298.5925926	192.9642
16.59574468	5.282978723	1099.55102	1449.3125	58.64444444	60.38461538	294.1785714	298.5	164.2248511
8.914285714	2.328571429	1099.461538	1449.259259	56.57894737	58.27272727	292.7586207	295.2222222	88.21220571
15.6	4.9	1099.948718	1449.297872	59.13043478	61.11111111	293.8392857	296.2241379	154.37136
15.6	4.9	1099.857143	1449.804878	56.40425532	57.89189189	291.4464286	294.7407407	154.37136
9.551020408	2.573469388	1099.369565	1448.971429	56.86842105	58.55	290.9821429	296.7272727	94.51307755
13.86666667	4.233333333	1099.475	1448.976744	56.79591837	58.69444444	295.0892857	299.1754386	137.2189867
13.37142857	4.042857143	1099.527778	1449.833333	60.13953488	61.72222222	293.6428571	297.2777778	132.3183086
8.914285714	2.328571429	1099.625	1449.178571	60.04347826	61.88888889	292.0363636	296.5	88.21220571
19.5	6.4	1099.434783	1450	53.65306122	55.91666667	294.6181818	297.8928571	192.9642
14.51162791	4.481395349	1099.823529	1449.551724	55.49019608	58.12121212	292.3636364	296.7636364	143.6012651
19.5	6.4	1099.27907	1449.378378	58.97959184	60.8125	292.4038462	295.3928571	192.9642
16.13793103	5.106896552	1099.5	1449.75	58.95918367	60.83333333	291.9814815	296.3859649	159.6945103
15.29411765	4.782352941	1099.891892	1448.97619	55.72916667	57.20512821	291.4339623	295.5925926	151.3444706
16	5.053846154	1099.571429	1449.59375	56.25	57.92105263	294.9814815	298.462963	158.3296
14.44444444	4.455555556	1099.45	1449.481481	56.15217391	58.16666667	295.2692308	300.2692308	142.9364444
12.48	3.7	1099.3	1449.45	55.17391304	57.84210526	295.1320755	298.3818182	123.497088
12.64864865	3.764864865	1099.723404	1449.375	60.27659574	62	293.7454545	297.9245283	125.1659676
12	3.515384615	1099.644444	1449.828571	60.27083333	61.89473684	295.4561404	300.8928571	118.7472
12	3.515384615	1099.47619	1449.6	57.61538462	60.55102041	293.2363636	297.6140351	118.7472
13	3.9	1099.375	1448.972222	59.52830189	60.09090909	293.9107143	299.0740741	128.6428
8.432432432	2.143243243	1099.244898	1449.44186	56.35849057	58.03846154	292.3214286	296.9454545	83.44397838
17.33333333	5.566666667	1099.586207	1449.035714	57.96	59.775	296.0535714	300.0877193	171.5237333
15.91836735	5.02244898	1099.5	1449.448276	57.41176471	58.69444444	293.1818182	297.3818182	157.5217959
14.18181818	4.354545455	1099.84	1449.648649	54.48	55.93939394	292.4545455	296.8421053	140.3376
16	5.053846154	1099.5	1449.388889	59.44680851	60.61363636	293.7068966	298.8333333	158.3296
15.6	4.9	1099.404762	1448.944444	55.71698113	56.21818182	290.4385965	295.1551724	154.37136
12	3.515384615	1099.942857	1449.677419	56.28571429	57.76363636	292.4181818	295.9298246	118.7472
10.4	2.9	1099.564103	1449.621622	55.6	56.0754717	291.6078431	295.7068966	102.91424
13	3.9	1099.681818	1449.763158	53.09433962	55.14583333	294.6481481	299.0535714	128.6428
19.5	6.4	1099.9375	1449.731707	52.95918367	54.04878049	291.5555556	296.5454545	192.9642
15.6	4.9	1099.642857	1449.69697	52.42592593	54.65853659	294.7407407	299.38	154.37136
9.176470588	2.429411765	1099.25	1449.761905	56.33333333	57.71428571	294.4035088	299.3448276	90.80668235
17.33333333	5.566666667	1099.772727	1449.40625	55.96363636	57.67391304	291.9482759	297.2631579	171.5237333
11.14285714	3.185714286	1099.390244	1449.771429	54.38	56.02564103	295.5263158	300.5714286	110.2652571
11.14285714	3.185714286	1099.243243	1449.589744	54.41304348	55.76315789	293.6785714	297.7413793	110.2652571
13	3.9	1099.794118	1448.973684	52.54716981	54.23255814	291.1403509	294.8965517	128.6428
14.85714286	4.614285714	1099.512821	1449.974359	53.1372549	54.18604651	291.2181818	295.0185185	147.0203429
14.18181818	4.354545455	1099.634146	1448.882353	55.48148148	58.21276596	292.5	296.490566	140.3376
21.27272727	7.081818182	1099.818182	1449.690476	56.13461538	57.86842105	292.5344828	297.1403509	210.5064
17.82857143	5.757142857	1099.692308	1449.282609	55.97916667	57.48837209	293.1818182	297.4821429	176.4244114
11.7	3.4	1099.264151	1449.486486	53.27272727	55.68085106	292.6785714	296.490566	115.77852
12.48	3.7	1099.710526	1449.282609	55.05769231	57.08163265	294.0576923	298.2884615	123.497088
8.509090909	2.172727273	1099.642857	1449.452381	55.33962264	57.14	290.1090909	294.9818182	84.20256
12.73469388	3.797959184	1099.526316	1449.666667	55.29411765	56.95348837	292.1090909	296.0188679	126.0174367
12.48	3.7	1099.545455	1449.536585	55.32	56.25	292.5660377	295.9814815	123.497088
11.14285714	3.185714286	1099.594595	1449.952381	52.44680851	54.71111111	291.6428571	295.7017544	110.2652571
11.55555556	3.344444444	1099.6875	1449.083333	54.06	56.46	292.462963	296.6	114.3491556
9.176470588	2.429411765	1099.473684	1449.857143	54.39215686	56.13953488	290.9038462	295.5714286	90.80668235
14.18181818	4.354545455	1099.571429	1449.774194	58.75	60.34090909	294.1071429	297.8275862	140.3376
15.86440678	5.001694915	1099.826087	1449.65	58.54	60.25641026	295.6315789	298.9807692	156.9878237
19.5	6.4	1099.711111	1449.242424	59.48148148	60.91666667	292.9137931	296.637931	192.9642
11.7	3.4	1099.642857	1449.342105	56.1	57.475	295	299.4	115.77852
10.4	2.9	1099.931818	1449.5	58.93877551	60.51351351	294.8571429	300.0727273	102.91424
13.27659574	4.006382979	1099.25	1449.125	53.20408163	55.87804878	292.9655172	297.3157895	131.3798809
8.432432432	2.143243243	1099.261905	1449.638889	59.68627451	60.91666667	293.2142857	297.2280702	83.44397838
14.85714286	4.614285714	1099.885714	1448.914894	59.97959184	60.95454545	291.7719298	294.9107143	147.0203429
12	3.515384615	1099.486486	1449.121951	57.64583333	59.30434783	293.4230769	296.5961538	118.7472
10.4	2.9	1099.738095	1448.955556	57.79591837	59.25	292.3272727	296.7777778	102.91424
8.666666667	2.233333333	1099.621622	1449.133333	57.7	58.85714286	291.9272727	295.2758621	85.76186667
13.92857143	4.257142857	1099.478261	1449.139535	59.1875	60.15	293.4285714	297.8421053	137.8315714
15.6	4.9	1099.275	1449.305556	55.78	57.625	291.3396226	295.2807018	154.37136
15.29411765	4.782352941	1099.878788	1449.8	58.41509434	60.25581395	293.6792453	297.3859649	151.3444706
14.44444444	4.455555556	1099.5	1449.676471	58.66666667	60.29268293	294.7592593	298.9473684	142.9364444
13.56521739	4.117391304	1099.321429	1449.257143	59.5	60.18421053	294.0526316	297.2586207	134.2359652
12	3.515384615	1099.777778	1449.842105	52.66666667	54.25581395	295.0526316	298.1403509	118.7472
15.6	4.9	1099.333333	1450.02439	52.7254902	54.55813953	294.1454545	297.7368421	154.37136
13.44827586	4.072413793	1099.68	1449.515152	52.3	54.31034483	294.8039216	300.2142857	133.0787586
14.85714286	4.614285714	1099.709677	1449.393939	52.25	54.18518519	291.8727273	297.375	147.0203429
14.18181818	4.354545455	1099.307692	1449	58.05405405	59.5625	295	299.2037037	140.3376
17.33333333	5.566666667	1099.692308	1449.95122	60.38636364	62.03448276	294.7407407	299.2407407	171.5237333
15.29411765	4.782352941	1099.6	1449.142857	60.33333333	62.02857143	295.625	298.6851852	151.3444706
18.35294118	5.958823529	1099.468085	1449.692308	59.97435897	61.6875	292.4727273	298.4313725	181.6133647
12	3.515384615	1099.729167	1449.190476	60.16	62.03703704	292.9107143	296.9122807	118.7472
12.48	3.7	1099.533333	1450.020833	60.475	62.31428571	294.4210526	298.8727273	123.497088
11.14285714	3.185714286	1099.676471	1449.177778	60.27906977	61.84210526	290.8571429	295.6785714	110.2652571
8.666666667	2.233333333	1099.333333	1450.02439	58.06976744	59.73529412	291.7636364	295.6666667	85.76186667
10.75862069	3.037931034	1099.529412	1449.71875	56.36363636	58.11764706	293.6111111	296.6727273	106.4630069
11.55555556	3.344444444	1099.342857	1449.769231	59.67391304	61.86956522	291.875	296.6071429	114.3491556
9.551020408	2.573469388	1099.6	1449.893617	58.2826087	59.77777778	294.122807	297.8727273	94.51307755
9.75	2.65	1099.911765	1449.368421	60.13333333	62.16129032	295.1132075	298.9272727	96.4821
11.34545455	3.263636364	1099.8	1449.708333	59.66666667	61.48484848	292.3571429	296.1886792	112.27008
9.36	2.5	1099.227273	1449.542857	60.27906977	61.9	294.1071429	297.5090909	92.622816
12.64864865	3.764864865	1099.346939	1448.878049	57.88372093	59.44	293.3392857	297.8035714	125.1659676
9.551020408	2.573469388	1099.578947	1449.333333	56.11363636	57.61290323	295.1090909	298.6727273	94.51307755
17.33333333	5.566666667	1099.416667	1449.027778	56.02439024	57.79411765	293.5714286	297.0535714	171.5237333
18	5.823076923	1099.25	1449.909091	59.87755102	61.58823529	292.5964912	296.2363636	178.1208
9	2.361538462	1099.510638	1449.466667	58.57142857	60.52	294.3818182	299.4821429	89.0604
9.75	2.65	1099.25	1449.396226	57.76	59.42857143	292.6545455	297.2962963	96.4821
9.75	2.65	1099.333333	1449.191489	57.93181818	59.67857143	294.8269231	297.8571429	96.4821
9.454545455	2.536363636	1099.8	1449.102564	59.63043478	61.34285714	294.8490566	299.6851852	93.5584
11.7	3.4	1099.5	1449.725	58.36363636	60.5483871	294.4642857	297.8392857	115.77852
19.02439024	6.217073171	1099.347826	1449.25	55.46511628	57.46875	294.2631579	297.4035088	188.2577561
14.85714286	4.614285714	1099.583333	1449.571429	53.12195122	55	292.5964912	296	147.0203429
13.76470588	4.194117647	1099.25	1449.44898	52.91111111	54.88235294	291.9310345	295.4181818	136.2100235
16.42105263	5.215789474	1099.652174	1449.974359	53.66666667	55.42307692	294.2363636	297.8793103	162.4961684
17.33333333	5.566666667	1099.756757	1449.25641	52.87179487	55.09677419	293.245614	296.9107143	171.5237333
13.56521739	4.117391304	1099.862069	1448.945946	55.66666667	57.68965517	293.5357143	297.3272727	134.2359652
9.176470588	2.429411765	1099.258065	1449.076923	58.79545455	60.73076923	293.7222222	296.4528302	90.80668235
18.35294118	5.958823529	1099.657143	1449.097561	59.19047619	60.76315789	291.4150943	295.5964912	181.6133647
13	3.9	1099.542857	1449.710526	60.08163265	61.6	292.0377358	296.3148148	128.6428
16.42105263	5.215789474	1099.604651	1449.571429	60.0625	61.47222222	293.5862069	297.5740741	162.4961684
15	4.669230769	1099.891892	1449.209302	56.75609756	58.48484848	292.3214286	298.2678571	148.434
16.25	5.15	1099.375	1449.625	54.55555556	56.15625	293.0175439	300.2857143	160.8035
11.14285714	3.185714286	1099.52	1449.26087	54.33333333	56.1	292	298.9655172	110.2652571
12	3.515384615	1099.722222	1449.113636	57.38095238	59.13333333	291.7586207	298.5614035	118.7472
9.176470588	2.429411765	1099.265306	1449.552632	58.13953488	60.12903226	290.6111111	296.6034483	90.80668235
16.95652174	5.42173913	1099.52381	1449.648649	55	57	290.7857143	299.6964286	167.7949565
10.94736842	3.110526316	1099.483871	1449	55.52083333	57.38709677	294.1428571	300.5454545	108.3307789
14.625	4.525	1099.5	1449.714286	55.28571429	57.03448276	292.8947368	300.2631579	144.72315
12.73469388	3.797959184	1099.4	1449.078947	51.95238095	54.11627907	292.4827586	299.5344828	126.0174367
12.48	3.7	1099.733333	1449.977778	53.56521739	55	290.4727273	296.6428571	123.497088
11.55555556	3.344444444	1099.921053	1449.783784	55.95555556	57.73913043	292.4561404	299.1785714	114.3491556
12	3.515384615	1099.5	1449.02381	55.86363636	56.96428571	293.1272727	299.4035088	118.7472
17.33333333	5.566666667	1099.470588	1449.482759	55.95652174	57.80769231	293	299.4482759	171.5237333
11.7	3.4	1099.368421	1449.820513	56.38636364	58.34615385	292.9649123	299.2545455	115.77852
15.2195122	4.753658537	1099.473684	1449.195122	52.48979592	54.29166667	294.2241379	300.5357143	150.6062049
19.5	6.4	1099.555556	1449.232558	56.48648649	58.44444444	294.2413793	299.5535714	192.9642
9.957446809	2.729787234	1099.5	1449.214286	56.48888889	58.47826087	292.0877193	299.1636364	98.53491064
10.63636364	2.990909091	1099.969697	1449.139535	56.65853659	58.42307692	290.9433962	297.4909091	105.2532
14.18181818	4.354545455	1099.521739	1449.5	54.75	56.725	292.4736842	300.3333333	140.3376
10.4	2.9	1099.269231	1449.138889	54.475	56.05405405	294	300.4310345	102.91424
13.92857143	4.257142857	1099.40625	1449.333333	54.84090909	56.775	294.754386	300.7457627	137.8315714
9.75	2.65	1099.5	1449.75	53.70212766	55.41176471	295.1428571	300.3103448	96.4821
9.176470588	2.429411765	1099.521739	1449.171429	53.88095238	55.38095238	293.3965517	299.6964286	90.80668235
9.454545455	2.536363636	1099.552632	1449.235294	55.26315789	57.07142857	294.5438596	300.625	93.5584
18.72	6.1	1099.681818	1449.321429	53.375	55.34285714	294.625	300.3571429	185.245632
13	3.9	1099.619048	1449.03125	57.29787234	59.13793103	290.8363636	297.122807	128.6428
17.66037736	5.69245283	1099.538462	1449.310345	54.4	56.2	292.9807692	299.1454545	174.7600302
17.33333333	5.566666667	1099.678571	1449.378378	54.79487179	56.4137931	293.4310345	299.2586207	171.5237333
15.6	4.9	1099.722222	1449.625	54.10526316	55.81481481	293.6428571	299.6551724	154.37136
9.176470588	2.429411765	1099.767442	1449.642857	54.58974359	56.25925926	291.9298246	298.0181818	90.80668235
15.2195122	4.753658537	1099.428571	1449.583333	52.63043478	54.20689655	292.9122807	299.0175439	150.6062049
15.6	4.9	1099.318182	1449.953488	54.1	56.0625	294.8214286	300.4285714	154.37136
12.23529412	3.605882353	1099.5	1449.384615	54.90909091	56.17391304	292.4210526	299	121.0755765
19.02439024	6.217073171	1099.333333	1449.125	58.31818182	59.8	292.8421053	298.125	188.2577561
11.77358491	3.428301887	1099.538462	1449.514286	58.02325581	60.35	293.4	299.6363636	116.5066868
12.31578947	3.636842105	1099.837209	1449.914286	60.25581395	61.76	293.1785714	299.7090909	121.8721263
20	6.592307692	1099.625	1449.325	59.91666667	62	291.8928571	298.8214286	197.912
9.75	2.65	1099.913043	1449.956522	58.54285714	60.23076923	291.1818182	296.4909091	96.4821
19.5	6.4	1099.44186	1449.333333	57.40909091	59.59259259	293.0535714	299.5263158	192.9642
12.64864865	3.764864865	1099.625	1449.552632	52.97560976	54.48571429	291.4482759	296.2280702	125.1659676
16.86486486	5.386486486	1099.911765	1448.978261	59.51162791	61.09677419	291.5	298.3392857	166.8879568
18.90909091	6.172727273	1099.428571	1449.565217	55.73913043	57.64705882	295.1071429	300.8596491	187.1168
16.86486486	5.386486486	1099.52381	1449.272727	55.94	57.76470588	291.7272727	297.6610169	166.8879568
10.4	2.9	1099.535714	1449.125	55.52272727	57.09375	291.862069	297.8928571	102.91424
16.42105263	5.215789474	1099.325581	1449.225806	54.5625	56.76315789	291.7321429	298.6034483	162.4961684
17.33333333	5.566666667	1099.5	1448.925	55.5	56.55	294.8793103	300.5517241	171.5237333
11.14285714	3.185714286	1099.794872	1449.295455	54.7254902	56.43243243	291.5087719	298.4827586	110.2652571
11.14285714	3.185714286	1099.512195	1449.552632	54.54	57	291.3928571	298.0175439	110.2652571
13	3.9	1099.606061	1449.652174	55.40816327	56.97058824	294.3214286	299.9649123	128.6428
13	3.9	1099.631579	1449.8	54.54	56.65	293.7894737	299.8245614	128.6428
19.5	6.4	1099.238095	1449.566667	54.70212766	56.53488372	292.5172414	298.8928571	192.9642
9.176470588	2.429411765	1099.84375	1449.055556	55.57446809	56.40540541	291.3214286	299.0892857	90.80668235
11.77358491	3.428301887	1099.466667	1448.95	53.70833333	55.9375	292.3859649	297.7931034	116.5066868
12	3.515384615	1099.878788	1449.361702	53.32608696	55.05714286	294.4821429	300.0701754	118.7472
10.17391304	2.813043478	1099.444444	1449.333333	54.3	55.81081081	295.7192982	300.8181818	100.6769739
8.914285714	2.328571429	1099.5	1449.617021	53.63043478	56.10344828	294.1551724	300.4482759	88.21220571
13.56521739	4.117391304	1099.804348	1449.189189	53.76	55.59459459	292.6206897	298.9655172	134.2359652
15.6	4.9	1099.478261	1449.333333	54.86956522	55.96296296	292.7090909	299.2807018	154.37136
13.92857143	4.257142857	1099.410256	1449.142857	52	54.25	291.6071429	295.5178571	137.8315714
9.454545455	2.536363636	1099.452381	1449	52.52727273	54.22222222	291.4464286	298.8	93.5584
15.6	4.9	1099.55	1449.111111	52.89361702	55.2	294.3392857	300.2586207	154.37136
12	3.515384615	1099.388889	1449.382979	55.97560976	62.47916667	295.6491228	300.862069	118.7472
10.75862069	3.037931034	1099.310345	1449.636364	54.60869565	60.83333333	293.4285714	300.137931	106.4630069
11.14285714	3.185714286	1099.305556	1449.411765	53.54347826	60.16326531	295.6724138	299.6666667	110.2652571
10.06451613	2.770967742	1099.307692	1449.678571	53.65957447	59.86538462	293.6896552	299.2241379	99.59442581
17.33333333	5.566666667	1099.228571	1449	53.82352941	59.8627451	292.1578947	297.4210526	171.5237333
8.830188679	2.296226415	1099.416667	1448.878049	54.13636364	60.1509434	291.6315789	298.0175439	87.38001509
9.176470588	2.429411765	1099.25	1449.512821	53.44680851	59.7037037	294.9137931	299.1818182	90.80668235
11.14285714	3.185714286	1099.424242	1449.555556	53.74509804	59.68518519	291.4181818	296.4285714	110.2652571
13	3.9	1099.65625	1449.822222	53.65116279	59.67272727	292.5263158	298.9649123	128.6428
8.666666667	2.233333333	1099.520833	1448.904762	53.3877551	59.30612245	294.6545455	300.8148148	85.76186667
14.18181818	4.354545455	1099.555556	1449.72973	52.52173913	58.65306122	290.7894737	297.6785714	140.3376
8.666666667	2.233333333	1099.621622	1449.410256	53.93877551	60.60416667	293.5892857	300.2807018	85.76186667
10.4	2.9	1099.594595	1449.142857	54.10416667	59.98039216	291.2105263	295.7037037	102.91424
12	3.515384615	1099.466667	1449.651163	53.82608696	60.52830189	292.4107143	297.2807018	118.7472
12.31578947	3.636842105	1099.26087	1450	53.80392157	61.05660377	295.1454545	299.4074074	121.8721263
8.432432432	2.143243243	1099.380952	1449	55.91176471	61.97826087	292.6964286	297.9464286	83.44397838
14.18181818	4.354545455	1099.666667	1449.909091	53.23809524	59.02040816	294.1578947	298.2413793	140.3376
9.176470588	2.429411765	1099.619048	1449.864865	53.11363636	59.44	294.8653846	298.375	90.80668235
18.35294118	5.958823529	1099.48	1449.081081	53.04651163	59.89361702	292.125	295.4561404	181.6133647
14.18181818	4.354545455	1099.533333	1449.730769	53.75675676	60.17777778	292.6140351	297.0877193	140.3376
19.5	6.4	1099.625	1449.551724	53.84210526	60.4047619	294.4909091	297.9615385	192.9642
13.56521739	4.117391304	1099.4375	1449.535714	55.19512195	61.7254902	291.3684211	295.0545455	134.2359652
11.41463415	3.290243902	1099.40625	1448.942857	55.63888889	62.10416667	293.4107143	297.9107143	112.9546537
8.666666667	2.233333333	1099.25	1449.407407	55.5	61.97959184	292.1052632	295.4385965	85.76186667
14.44444444	4.455555556	1099.829787	1448.941176	54.26829268	60.58333333	293.5517241	297.5862069	142.9364444
12.48	3.7	1099.724138	1450	55.19565217	61.90384615	291.6428571	296.9642857	123.497088
10.4	2.9	1099.37931	1449.7	53.68	60.29090909	295.2241379	300.3103448	102.91424
13.86666667	4.233333333	1099.518519	1449.666667	51.91111111	58.21568627	292.8596491	295.6909091	137.2189867
11.14285714	3.185714286	1099.734694	1448.880952	52.43478261	59.18518519	292.3454545	296.6727273	110.2652571
20.8	6.9	1099.657895	1449.97561	52.15909091	58.7037037	294.3571429	299.1034483	205.82848
13.56521739	4.117391304	1099.923077	1449.113636	52.73913043	59.03773585	290.3518519	295.0943396	134.2359652
9.551020408	2.573469388	1099.590909	1449.704545	52.22727273	58.74509804	292.8035714	297.0517241	94.51307755
11.14285714	3.185714286	1099.590909	1449.735294	51.97619048	59.7	293.2586207	297.3636364	110.2652571
10.17391304	2.813043478	1099.714286	1450.028571	51.95454545	58.50943396	294.0508475	298.5172414	100.6769739
15.6	4.9	1099.333333	1449.448276	52.73913043	58.83636364	292.3888889	297.1636364	154.37136
15.6	4.9	1099.470588	1449.103448	52.53488372	59.17307692	292.0526316	295.2631579	154.37136
18.72	6.1	1099.326087	1448.923077	52.23913043	58.80769231	292.3859649	297.9298246	185.245632
13	3.9	1099.5625	1449.25	55.3902439	62.1	291.375	294.9464286	128.6428
9.454545455	2.536363636	1099.735294	1449.976744	55.56756757	62.45283019	291.4912281	295.509434	93.5584
9.176470588	2.429411765	1099.535714	1449.054054	52.85416667	54.97058824	292.4912281	297.2142857	90.80668235
13.76470588	4.194117647	1099.310345	1449.769231	53.14583333	55.25	293.8301887	296.4339623	136.2100235
9.454545455	2.536363636	1099.451613	1449.869565	57.4375	59.18421053	293.1964286	295.5087719	93.5584
13.56521739	4.117391304	1099.688889	1449.897959	56.65116279	59.13157895	293.3035714	298.4912281	134.2359652
20.8	6.9	1099.5	1449.555556	57.08333333	59.18181818	294.4210526	298.6545455	205.82848
13	3.9	1099.666667	1449.674419	57.26086957	59.25	294.3157895	298	128.6428
12.31578947	3.636842105	1099.52381	1448.962963	57.51020408	59.05128205	290.0363636	295.1578947	121.8721263
14.51162791	4.481395349	1099.307692	1449.023256	56.55555556	59.07317073	294.7272727	299.375	143.6012651
13.56521739	4.117391304	1099.763158	1448.87234	57.27272727	59.16216216	292.3333333	296.2857143	134.2359652
13.56521739	4.117391304	1099.428571	1449.888889	57.06382979	58.96875	291.1403509	295.5614035	134.2359652
12.23529412	3.605882353	1099.840909	1449.666667	56.83333333	59.05714286	294.4464286	299.5789474	121.0755765
13.68421053	4.163157895	1099.785714	1449.869565	56.60465116	59.12121212	294.1052632	297.6545455	135.4134737
19.5	6.4	1099.83871	1449.695652	53.88888889	56.12820513	295.7931034	299.5862069	192.9642
15.09677419	4.706451613	1099.964286	1449.883721	56.25531915	58.29411765	292.122807	296.5517241	149.3916387
16.42105263	5.215789474	1099.5	1449.666667	52.47619048	54.41860465	295.4821429	297.1090909	162.4961684
8.666666667	2.233333333	1099.361111	1449.189189	54.27272727	56.06060606	290.8947368	296.2758621	85.76186667
16.42105263	5.215789474	1099.405405	1449.534884	56.18604651	58.23684211	292.9056604	296.0545455	162.4961684
10.4	2.9	1099.897436	1449.486486	55.16666667	57.30232558	292.1818182	297.6538462	102.91424
17.82857143	5.757142857	1099.324324	1449.088235	56.14634146	58.1	293.1481481	298.0555556	176.4244114
17.72727273	5.718181818	1099.606061	1449.363636	55.38095238	56.97142857	290.6724138	296.6724138	175.422
12.23529412	3.605882353	1099.282609	1449.75	55.54054054	57.52272727	291.5172414	295.9642857	121.0755765
10.06451613	2.770967742	1099.767442	1449.852941	55.09090909	57.12820513	291.2280702	296.2631579	99.59442581
12	3.515384615	1099.714286	1449.97619	53.35416667	54.97560976	290.0754717	295.6181818	118.7472
16.25	5.15	1099.485714	1449.40625	54.11627907	56.43589744	292.8965517	295.1320755	160.8035
18	5.823076923	1099.617021	1449.318182	53.53191489	55.46341463	291.9454545	296.0892857	178.1208
9.454545455	2.536363636	1099.773585	1448.878049	56.175	58.11764706	292.3571429	297.1111111	93.5584
14.18181818	4.354545455	1099.311111	1449.421053	55.2173913	57.44736842	293.6727273	296	140.3376
15.6	4.9	1099.425532	1449.317073	52.46341463	54.62790698	294.2982456	297.6071429	154.37136
12.23529412	3.605882353	1099.5	1449.756098	52.45454545	54.38095238	294.3333333	298.3928571	121.0755765
12.48	3.7	1099.588235	1449.243243	53	55.11111111	291.2857143	294.9298246	123.497088
8.509090909	2.172727273	1099.697674	1449.155556	52.55555556	54.26	294.7678571	299.1754386	84.20256
11.55555556	3.344444444	1099.540541	1450	55.25531915	57.43243243	293.8214286	297.1296296	114.3491556
18.72	6.1	1099.517241	1449.8	54.35416667	55.79487179	293.9655172	297.7068966	185.245632
12.64864865	3.764864865	1099.290323	1449.833333	56	58.13157895	294.3818182	297.5090909	125.1659676
18.35294118	5.958823529	1099.648649	1449.942857	52.31111111	54.2	293.8947368	299.5172414	181.6133647
11.14285714	3.185714286	1099.4	1449.659091	56.1627907	58.19444444	294.962963	298.6666667	110.2652571
19.5	6.4	1099.282051	1449.194444	54	55.94871795	293.3571429	296.6607143	192.9642
16.71428571	5.328571429	1099.612245	1449.647059	53.81395349	56.25806452	291.5636364	295.0892857	165.3978857
12	3.515384615	1099.695652	1449.318182	60.02173913	61.91666667	294.5862069	297.5087719	118.7472
10.4	2.9	1099.306122	1448.933333	59.74418605	61.36111111	291.0178571	295.1785714	102.91424
8.666666667	2.233333333	1099.511111	1449.225806	60.17021277	61.75757576	294.7068966	298.3448276	85.76186667
15.2195122	4.753658537	1099.545455	1449.911111	60.04545455	61.66666667	294.4642857	297.8245614	150.6062049
13.27659574	4.006382979	1099.268293	1449.954545	60.15909091	61.87096774	294.0689655	297.1034483	131.3798809
15	4.669230769	1099.627907	1448.906977	59.86046512	61.35483871	295.1730769	298.6964286	148.434
12	3.515384615	1099.466667	1449.15625	59.13333333	60.92857143	292.5	296.877193	118.7472
14.85714286	4.614285714	1099.818182	1449.025641	60.15909091	61.82608696	292.2586207	295.8909091	147.0203429
11.14285714	3.185714286	1099.666667	1449.861111	59.75	61.4	292.6842105	295.9074074	110.2652571
17.33333333	5.566666667	1099.7	1449.078947	59.79545455	61.6	294.6607143	300.6545455	171.5237333
13.27659574	4.006382979	1099.435897	1450.022727	60.18181818	62.15384615	292.754386	298.3859649	131.3798809
17.33333333	5.566666667	1099.4	1449.233333	57.73913043	59.3030303	295.1785714	300.7592593	171.5237333
14.18181818	4.354545455	1099.461538	1449.894737	57.68181818	59	293.9285714	300.6346154	140.3376
14.85714286	4.614285714	1099.444444	1449.545455	57.31111111	59.11764706	295.7413793	300.5769231	147.0203429
20.8	6.9	1099.565217	1449.314286	54.13043478	56.23529412	291.4642857	297.4181818	205.82848
14.85714286	4.614285714	1099.695652	1449.04878	60.08888889	61.80645161	294.6545455	297.9107143	147.0203429
13	3.9	1099.794872	1449.363636	60.25531915	62.24137931	292.3793103	296.3965517	128.6428
15.6	4.9	1099.521739	1449.96875	60.28947368	62.52380952	293.0363636	296.7254902	154.37136
13	3.9	1099.384615	1448.891892	55.75	57.53333333	293.6315789	296.5614035	128.6428
14.18181818	4.354545455	1099.77551	1449.02439	56.46808511	58.23809524	291.5	296.7321429	140.3376
15.6	4.9	1099.914894	1449.913043	56.27027027	58.20833333	292.2857143	297.8596491	154.37136
12	3.515384615	1099.688889	1449.0625	54.25	55.7826087	290.9827586	295.4067797	118.7472
13.56521739	4.117391304	1099.673077	1449.8	52.65116279	54.46666667	292.0892857	296.9818182	134.2359652
10.63636364	2.990909091	1099.390244	1449.967742	55.48888889	57.28571429	291.2413793	297.4107143	105.2532
11.41463415	3.290243902	1099.828571	1449	54.17391304	56.17857143	295.1929825	298.8571429	112.9546537
15.6	4.9	1099.648649	1449.647059	54.42553191	56.4137931	292.7192982	296.7068966	154.37136
9.454545455	2.536363636	1099.772727	1449.794872	56.65217391	58.48484848	294.1754386	297.0689655	93.5584
14.51162791	4.481395349	1099.55814	1449.282051	60.17391304	62.15384615	291.2962963	296.3454545	143.6012651
10.63636364	2.990909091	1099.333333	1449.277778	59.08510638	60.72	293.6140351	297.7413793	105.2532
11.77358491	3.428301887	1099.302326	1449.02381	60.19148936	61.92592593	292.0350877	296.375	116.5066868
11.14285714	3.185714286	1099.764706	1449.369565	59.975	61.5	295.0178571	298.0727273	110.2652571
18.57142857	6.042857143	1099.58	1449.333333	56.95744681	59	294.8947368	297.2857143	183.7754286
11.41463415	3.290243902	1099.5	1449.606061	57.76190476	59	294.75	297.7678571	112.9546537
19.5	6.4	1099.62963	1449.727273	60.19047619	62.14285714	294.6896552	297.6724138	192.9642
14.18181818	4.354545455	1099.384615	1449.552632	55.2826087	56.96	292.0526316	295.9137931	140.3376
13	3.9	1099.735294	1449.344828	54.75	56.86956522	293.3333333	296.4482759	128.6428
12.31578947	3.636842105	1099.608696	1448.977778	54.88372093	56.83333333	293.2909091	295.9137931	121.8721263
11.55555556	3.344444444	1099.575758	1449.837209	54.61538462	56.625	292.9272727	297.8928571	114.3491556
19.5	6.4	1099.645161	1449.972222	52.42222222	54.46428571	295.1454545	299.3454545	192.9642
17.33333333	5.566666667	1099.3	1449.081081	55.63636364	57.47368421	295.5714286	299.3818182	171.5237333
16.71428571	5.328571429	1099.692308	1450.032258	55.92857143	57.79310345	293	297.6111111	165.3978857
14.85714286	4.614285714	1099.375	1449.461538	53.30232558	55.5862069	295.1578947	298.8928571	147.0203429
14.51162791	4.481395349	1099.454545	1449.789474	56.19512195	58.03333333	295.3103448	298.5964912	143.6012651
14.51162791	4.481395349	1099.485714	1449.512821	56.30769231	57.94117647	294.8928571	297.0357143	143.6012651
13	3.9	1099.485714	1449.648649	56.44736842	57.89655172	295.5272727	297.7368421	128.6428
13.56521739	4.117391304	1099.277778	1449.5	56.11627907	58	293.4035088	296.4909091	134.2359652
14.18181818	4.354545455	1099.911111	1449.219512	52.79591837	54.91304348	295.2105263	297.7719298	140.3376
13.86666667	4.233333333	1099.547619	1449.108108	52.70731707	54.65625	291.7142857	296.4035088	137.2189867
16	5.053846154	1099.478261	1449.805556	55.97826087	57.89285714	293.4727273	296.7678571	158.3296
17.66037736	5.69245283	1099.518519	1449.324324	52.95348837	54.95454545	294.037037	297.2909091	174.7600302
14.85714286	4.614285714	1099.571429	1449.586207	54.43859649	56.27586207	295.0344828	298.5344828	147.0203429
9.551020408	2.573469388	1099.241379	1449.058824	54.28	56.06666667	295.7192982	299.0943396	94.51307755
14.85714286	4.614285714	1099.512195	1449.205128	52.51351351	54.48387097	295.4909091	298.4	147.0203429
10.75862069	3.037931034	1099.581395	1449.102564	53.02040816	54.875	293.2068966	296	106.4630069
11.14285714	3.185714286	1099.756098	1449.275	53.04444444	54.55172414	294.5438596	296.2105263	110.2652571
15.29411765	4.782352941	1099.53125	1449.302326	56.23809524	58.38461538	295.6363636	298.6551724	151.3444706
14.51162791	4.481395349	1099.457143	1449.060606	56.39130435	58.16	293.6551724	295.5714286	143.6012651
9.75	2.65	1099.852941	1449.666667	56.6744186	58.5	292.3965517	295.875	96.4821
19.5	6.4	1099.36	1449.909091	56.63829787	58.28571429	293.4137931	296.5517241	192.9642
19.02439024	6.217073171	1099.351351	1449.513514	55.89130435	58	295.6363636	299.0185185	188.2577561
14.18181818	4.354545455	1099.3125	1450.027778	53.28	55.04545455	293.4561404	295.8448276	140.3376
19.5	6.4	1099.522727	1449.146341	56.93478261	58.64583333	294.7037037	298.9444444	192.9642
11.77358491	3.428301887	1099.341463	1449.064516	56.29166667	58.04347826	291.4814815	294.7931034	116.5066868
9.75	2.65	1099.25	1449.185185	56.94871795	58.05	292.4736842	294.9649123	96.4821
10.63636364	2.990909091	1099.5	1449.444444	54.79545455	56.65116279	292.2321429	296.0363636	105.2532
21.27272727	7.081818182	1099.35	1448.886364	55.46666667	57.17777778	294.8301887	297.3396226	210.5064
10.4	2.9	1099.810811	1449.742857	55.8125	57.26829268	293.8727273	295.6792453	102.91424
14.44444444	4.455555556	1099.4	1449.928571	52.13157895	54.14285714	295.9655172	298.122807	142.9364444
15.6	4.9	1099.875	1449.431818	52.12765957	53.94594595	292.0754717	295.7241379	154.37136
13.56521739	4.117391304	1099.25	1449.545455	56.39130435	58.17647059	294.1071429	298.1296296	134.2359652
13.56521739	4.117391304	1099.666667	1449.8	57.23529412	59.30769231	294.0877193	296.2631579	134.2359652
10.17391304	2.813043478	1099.230769	1449.146341	58.07692308	59.95	293.1636364	295.2241379	100.6769739
16.42105263	5.215789474	1099.538462	1449.542857	52.81818182	54.53333333	292.7068966	295.7142857	162.4961684
11.14285714	3.185714286	1099.435897	1449.488372	53.30952381	55.03703704	294.2678571	298.4	110.2652571
17.33333333	5.566666667	1099.581395	1449.026316	53.7804878	55.56666667	294.3392857	297.0175439	171.5237333
14.18181818	4.354545455	1099.461538	1449.292683	53.63636364	55.58333333	295.4035088	297.9636364	140.3376
10.4	2.9	1099.295455	1449.051282	53.85416667	55.64285714	293.1754386	297.1754386	102.91424
9.176470588	2.429411765	1099.510204	1449.607143	53.88888889	55.60714286	294.862069	295.1636364	90.80668235
12.48	3.7	1099.421053	1449.815789	53.51111111	55.34482759	292.6363636	296.5689655	123.497088
9	2.361538462	1099.295455	1449.486486	52.81818182	54.31578947	294.5689655	298	89.0604
20.34782609	6.726086957	1099.387097	1448.891892	54.14285714	55.66666667	295.9298246	298.5272727	201.3539478
11.14285714	3.185714286	1099.463415	1449.52381	53.35897436	55.15625	295.537037	300.4912281	110.2652571
9.176470588	2.429411765	1099.764706	1449.688889	52.97916667	55.04545455	295.1071429	296.3275862	90.80668235
8.432432432	2.143243243	1099.277778	1449.846154	58.48780488	60.61538462	290.2962963	295.0377358	83.44397838
13	3.9	1099.404255	1449.131579	52.28947368	54.02941176	294.1851852	300.2115385	128.6428
19.5	6.4	1099.421053	1449.176471	55.9047619	58.125	290.9454545	296.9272727	192.9642
18.35294118	5.958823529	1099.611111	1449.060606	58.64285714	59.84	291.7777778	298.2142857	181.6133647
14.18181818	4.354545455	1099.390244	1449.644444	57.41463415	59.3	292.5535714	299.2545455	140.3376
14.71698113	4.560377358	1099.5	1449.861111	56.97297297	58.6	292.7818182	298.462963	145.6333585
20.34782609	6.726086957	1099.6	1449.682927	55.39130435	57.46666667	291.2857143	296.3508772	201.3539478
9.36	2.5	1099.805556	1449.340426	53.88636364	56.09375	292.6428571	298.5555556	92.622816
13	3.9	1099.818182	1449.435897	53	55.02857143	291.3703704	298.4181818	128.6428
10.75862069	3.037931034	1099.575	1449.292683	54.57777778	56.16666667	290.7454545	297.7090909	106.4630069
12	3.515384615	1099.241379	1449.166667	54.06976744	55.51851852	290.9615385	297.4727273	118.7472
14.18181818	4.354545455	1099.477273	1449.526316	54	56.21212121	292.3571429	299.5925926	140.3376
12	3.515384615	1099.972222	1449.575	54.45454545	56.12	294.7592593	300.8571429	118.7472
13	3.9	1099.361111	1449.75	54.53333333	56.18181818	293.1454545	299.6296296	128.6428
20.8	6.9	1099.454545	1449.529412	54.53333333	56.21428571	291.2407407	298.4528302	205.82848
15.6	4.9	1099.413793	1448.888889	54.68292683	55.86206897	293.4259259	300	154.37136
12.48	3.7	1099.366667	1449.548387	54.41463415	56.25	292.4	299.3214286	123.497088
17.33333333	5.566666667	1099.862069	1449.47619	53.84782609	55.65517241	292.7037037	298.5535714	171.5237333
12.48	3.7	1099.4	1449.595238	53.92682927	55.63414634	294.7222222	299.3684211	123.497088
16.13793103	5.106896552	1099.333333	1449.358974	54.08333333	56.13636364	292.0188679	298.6111111	159.6945103
12.48	3.7	1099.461538	1449.382353	54.21621622	56.16666667	291.6111111	298.7407407	123.497088
10.75862069	3.037931034	1099.576923	1449.225806	54.45454545	56.21428571	291.5714286	296.9818182	106.4630069
9.176470588	2.429411765	1099.470588	1449.8	53.20930233	54.68965517	290.1481481	296.8148148	90.80668235
15.6	4.9	1099.852941	1449.102564	54.34285714	56.33333333	290.8	297.7321429	154.37136
11.14285714	3.185714286	1099.627907	1449.114286	54.20930233	56.25	293.8909091	297.1296296	110.2652571
12.73469388	3.797959184	1099.473684	1449.953488	59.11627907	60.90322581	295.25	297.5535714	126.0174367
19.5	6.4	1099.32	1449.555556	60.37209302	62.25	295	296.8888889	192.9642
15.6	4.9	1099.380952	1449.348837	56.66666667	57.96666667	295.6071429	297.6111111	154.37136
19.5	6.4	1099.794872	1449.595238	57.41304348	58.86486486	293	296.7222222	192.9642
16.95652174	5.42173913	1099.428571	1450.027778	56.58139535	58.75757576	295.2727273	298.4642857	167.7949565
16.13793103	5.106896552	1099.6875	1449.565217	60.19047619	62.03448276	294.5892857	297	159.6945103
15.86440678	5.001694915	1099.4	1449.568182	60.15217391	62	295.2321429	298.2909091	156.9878237
15.29411765	4.782352941	1099.710526	1449.647059	54	55.73076923	292.0980392	299.2264151	151.3444706
12.31578947	3.636842105	1099.84	1449.977273	53.74358974	55.58333333	292.3469388	300	121.8721263
17.66037736	5.69245283	1099.469388	1449.348837	53.44117647	55.63333333	293.2545455	298.6923077	174.7600302
12.48	3.7	1099.611111	1449.214286	52.89583333	54.8	291.4545455	299.1785714	123.497088
12.73469388	3.797959184	1099.361702	1449.9	52.95555556	55.11764706	294.6181818	300.0714286	126.0174367
17.33333333	5.566666667	1099.471698	1449.555556	52.91111111	54.6	290.5357143	297.0545455	171.5237333
10.63636364	2.990909091	1099.648649	1449.268293	53.58536585	55.31034483	290.0363636	296.1090909	105.2532
11.77358491	3.428301887	1099.516129	1449.916667	52.07142857	54.03333333	291.9814815	298.4528302	116.5066868
21.51724138	7.175862069	1099.272727	1449.627907	52.35897436	54.38235294	292.8	299.3214286	212.9260138
11.77358491	3.428301887	1099.297872	1449.292683	52.19047619	54.23333333	292.3461538	298.3076923	116.5066868
11.55555556	3.344444444	1099.516129	1449.886364	52.4893617	54.15151515	294.1454545	300.5714286	114.3491556
16.42105263	5.215789474	1099.513514	1450	52.4	54.44	292.1666667	298.7358491	162.4961684
14.18181818	4.354545455	1099.592593	1449.47619	52.3255814	54.16666667	290.25	297.7636364	140.3376
8.509090909	2.172727273	1099.677419	1449.5	52.46511628	54.24242424	293.3090909	299.0727273	84.20256
12	3.515384615	1099.6	1449.02381	52.54347826	54.26666667	293.1132075	300.0555556	118.7472
11.14285714	3.185714286	1099.74	1449.190476	51.87804878	54.04166667	292.1636364	299.0566038	110.2652571
18.35294118	5.958823529	1099.470588	1449.435897	52.82926829	54.44444444	291.3703704	297.1111111	181.6133647
13	3.9	1099.384615	1449.83871	52.3	54.11111111	290.6415094	296.7321429	128.6428
9.551020408	2.573469388	1099.45	1449.325	52.54761905	54.15151515	289.8888889	296.1818182	94.51307755
16.42105263	5.215789474	1099.818182	1449.97619	53.60416667	55.35135135	295.1272727	299.9019608	162.4961684
9.75	2.65	1099.64	1449.714286	56.33333333	58.0625	293.6666667	294.9622642	96.4821
14.18181818	4.354545455	1099.232558	1449	57.48888889	59.14814815	295	297.8545455	140.3376
16.95652174	5.42173913	1099.682927	1449.5	57.70833333	59.37931034	294.2962963	297	167.7949565
17.33333333	5.566666667	1099.653846	1449.820513	58.38461538	59.84210526	294.5892857	299.3636364	171.5237333
10.88372093	3.086046512	1099.65625	1449.113636	54.5	56.3125	293.3392857	297.8727273	107.7009488
11.14285714	3.185714286	1099.486486	1449.1	54.44117647	56.5	294.5818182	299.9285714	110.2652571
15.6	4.9	1099.424242	1449.361111	57.55813953	59.96774194	294.375	298.5357143	154.37136
12	3.515384615	1099.722222	1449.354167	58.56521739	60.38095238	295.5454545	300.4642857	118.7472
12.64864865	3.764864865	1099.847826	1449.972973	58.62790698	60.77419355	295.8909091	300.4	125.1659676
11.14285714	3.185714286	1099.380952	1449.97619	59.72093023	61.42857143	295.0181818	299.7017544	110.2652571
16.42105263	5.215789474	1099.630435	1449.318182	59	60.875	295.125	299.5535714	162.4961684
15.6	4.9	1099.473684	1449.277778	57.72093023	59.25	291.6785714	294.7272727	154.37136
17.33333333	5.566666667	1099.464286	1449.85	58.07142857	60.09090909	294.3636364	298.3818182	171.5237333
16.13793103	5.106896552	1099.933333	1449.422222	57.57894737	58.94285714	294.3076923	296.9107143	159.6945103
13.86666667	4.233333333	1099.26087	1449.243243	58.88095238	60.61290323	292.8909091	296.9642857	137.2189867
19.5	6.4	1099.775	1449.175	59.80555556	61.58823529	294.1071429	297.7857143	192.9642
14.18181818	4.354545455	1099.76087	1449.022727	60.38461538	61.96666667	291.3962264	294.7924528	140.3376
12	3.515384615	1099.35	1449.409091	59.3	61.5	294.0740741	299.2592593	118.7472
9.75	2.65	1099.5	1449.785714	55.25	57.47222222	291.3272727	298.2592593	96.4821
20	6.592307692	1099.466667	1449.690476	54.72093023	56.8	294.0576923	300.254902	197.912
15.09677419	4.706451613	1099.608696	1449.891892	54.86046512	56.73684211	292.0181818	298.8867925	149.3916387
12.64864865	3.764864865	1099.611111	1449	54.54347826	56.5952381	291.4423077	299.3148148	125.1659676
13	3.9	1099.684211	1449	54.44444444	56.74358974	289.9259259	296.7454545	128.6428
14.44444444	4.455555556	1099.225	1449.454545	56.18367347	58.23076923	290.0188679	297.1111111	142.9364444
13.27659574	4.006382979	1099.310345	1448.970588	55.57142857	57.61111111	291.9636364	298.3392857	131.3798809
8.432432432	2.143243243	1099.722222	1449.12766	54.77272727	56.8	291.8363636	299.3392857	83.44397838
11.77358491	3.428301887	1099.548387	1449.026316	55.38095238	57.2	290.0175439	297.4727273	116.5066868
10.88372093	3.086046512	1099.771429	1449.72973	55.20454545	57.58333333	291.0555556	296.6481481	107.7009488
10.4	2.9	1099.302326	1449.514286	55.13157895	57.625	292.2641509	299.0588235	102.91424
9.176470588	2.429411765	1099.529412	1449.085714	55.97826087	58.06976744	293.9259259	300.8076923	90.80668235
9.176470588	2.429411765	1099.6	1449.552632	55.72340426	57.7037037	290.0727273	296.1132075	90.80668235
16.13793103	5.106896552	1099.809524	1449.6	55.91489362	57.57692308	293.1111111	300.4181818	159.6945103
13	3.9	1099.382353	1449.857143	55.475	57.44827586	291.3392857	297.2037037	128.6428
8.666666667	2.233333333	1099.658537	1449.108108	55.40540541	57.5483871	293.0740741	300.2592593	85.76186667
8.509090909	2.172727273	1099.395349	1449.473684	52.95454545	55.27272727	291.4285714	298.8392857	84.20256
10.4	2.9	1099.5	1449.413793	55.7	57.84615385	295.1132075	300.6481481	102.91424
16.86486486	5.386486486	1099.6	1449.046512	55.9787234	57.84375	294.74	300.877551	166.8879568
10.88372093	3.086046512	1099.511111	1449.341463	55.90909091	57.80645161	292.2545455	299.4	107.7009488
12.48	3.7	1099.479167	1449.628571	55.3902439	57.5	290.0555556	296.6346154	123.497088
15	4.669230769	1099.865385	1449	55.43589744	57.55172414	294.6545455	300.2692308	148.434
18.35294118	5.958823529	1099.291667	1448.953488	55.45	57.5	293.0545455	300.0714286	181.6133647
13	3.9	1099.512821	1449.093023	55.97777778	57.64285714	292.8035714	299.5185185	128.6428
9.176470588	2.429411765	1099.711111	1449	56.175	58	293	299.8909091	90.80668235
15.6	4.9	1099.693878	1449.74359	56.05	57.88	291.5714286	298.9821429	154.37136
14.18181818	4.354545455	1099.813953	1449	56	57.80769231	291.8363636	297.9454545	140.3376
17.33333333	5.566666667	1099.28125	1450.034483	55.19512195	57.13793103	290.3272727	296.7169811	171.5237333
10.57627119	2.96779661	1099.541667	1449.233333	55.31707317	57.11538462	289.9636364	297.1132075	104.6585492
9.75	2.65	1099.375	1449.705882	56	57.96428571	292.1071429	298.6964286	96.4821
14.18181818	4.354545455	1099.384615	1449.689655	56.26315789	58.18181818	290.6111111	297	140.3376
11.14285714	3.185714286	1099.315789	1449.365854	55.97777778	58	293.7222222	300	110.2652571
9.75	2.65	1099.441176	1449.261905	60.31428571	62.38095238	289.9056604	296.6470588	96.4821
13.37142857	4.042857143	1099.902439	1449.777778	54.2972973	55.90909091	290.1481481	296.8181818	132.3183086
9.454545455	2.536363636	1099.52	1449.428571	54.02380952	56	293.75	300.8214286	93.5584
19.5	6.4	1099.354839	1449.02439	59.75	61.52173913	293.9642857	300.4363636	192.9642
8.666666667	2.233333333	1099.324324	1449.282051	57.04347826	59.25	290.5471698	297.5925926	85.76186667
15.09677419	4.706451613	1099.765957	1448.972973	59.97435897	61.31818182	290.0701754	297.3636364	149.3916387
8.830188679	2.296226415	1099.857143	1448.97561	54.31111111	55.76	289.9285714	295.7857143	87.38001509
