# Supplementary material for: Optimization of Process Control Parameters for Fully Mechanized Mining Face Based on ANN and GA
Source: Comput Intell Neurosci. 2021 May 25;2021:5557831. doi: 10.1155/2021/5557831 (PMC8169252; doi:10.1155/2021/5557831)
Supplement: Supplementary Materials — The three supplementary data files provided in this paper are obtained by our laboratory. Data 1 is dataset 1 used in the paper; it contains all the historical production data of the key process control parameters of each production equipment collected by the sensors at the production site of the fully mechanized mining face. Data 2 is dataset 2 used in the paper which is filtered from dataset 1 to train and test the model in the paper. Data 3 is the operating trajectory data of the shearer. [file 5557831.f1.zip › data3.csv]

time	value
2020/11/19 0:00:38	58
2020/11/19 0:00:43	56
2020/11/19 0:00:49	55
2020/11/19 0:01:14	54
2020/11/19 0:01:26	53
2020/11/19 0:01:56	50
2020/11/19 0:02:01	49
2020/11/19 0:02:42	48
2020/11/19 0:02:43	47
2020/11/19 0:03:02	46
2020/11/19 0:03:09	45
2020/11/19 0:03:35	43
2020/11/19 0:03:46	42
2020/11/19 0:04:15	41
2020/11/19 0:04:21	40
2020/11/19 0:04:40	39
2020/11/19 0:04:49	38
2020/11/19 0:05:01	37
2020/11/19 0:06:00	36
2020/11/19 0:07:35	35
2020/11/19 0:07:47	34
2020/11/19 0:08:08	33
2020/11/19 0:08:13	32
2020/11/19 0:08:35	31
2020/11/19 0:08:40	30
2020/11/19 0:08:47	29
2020/11/19 0:09:02	28
2020/11/19 0:09:23	27
2020/11/19 0:09:35	26
2020/11/19 0:09:39	25
2020/11/19 0:09:48	24
2020/11/19 0:10:01	23
2020/11/19 0:10:19	21
2020/11/19 0:10:25	20
2020/11/19 0:11:04	19
2020/11/19 0:11:18	18
2020/11/19 0:11:33	17
2020/11/19 0:11:44	15
2020/11/19 0:12:04	14
2020/11/19 0:12:36	12
2020/11/19 0:12:48	11
2020/11/19 0:13:19	10
2020/11/19 0:13:36	9
2020/11/19 0:14:58	8
2020/11/19 0:15:49	11
2020/11/19 0:15:59	12
2020/11/19 0:16:22	13
2020/11/19 0:16:24	14
2020/11/19 0:16:27	15
2020/11/19 0:17:02	16
2020/11/19 0:17:05	17
2020/11/19 0:17:12	18
2020/11/19 0:17:22	19
2020/11/19 0:17:24	20
2020/11/19 0:17:31	21
2020/11/19 0:19:58	18
2020/11/19 0:20:24	15
2020/11/19 0:20:51	14
2020/11/19 0:21:34	12
2020/11/19 0:21:44	11
2020/11/19 0:22:22	10
2020/11/19 0:22:27	9
2020/11/19 0:22:32	8
2020/11/19 0:22:41	7
2020/11/19 0:25:15	10
2020/11/19 0:25:16	11
2020/11/19 0:33:03	12
2020/11/19 0:33:49	13
2020/11/19 0:33:56	14
2020/11/19 0:34:10	15
2020/11/19 0:35:10	16
2020/11/19 0:35:22	17
2020/11/19 0:37:01	18
2020/11/19 0:37:11	19
2020/11/19 0:37:49	20
2020/11/19 0:38:01	21
2020/11/19 0:38:46	22
2020/11/19 0:38:49	23
2020/11/19 0:38:53	24
2020/11/19 0:39:09	25
2020/11/19 0:39:24	26
2020/11/19 0:39:32	27
2020/11/19 0:39:40	28
2020/11/19 0:39:44	29
2020/11/19 0:40:18	30
2020/11/19 0:40:36	31
2020/11/19 0:40:39	32
2020/11/19 0:40:48	33
2020/11/19 0:41:03	34
2020/11/19 0:41:07	35
2020/11/19 0:41:37	36
2020/11/19 0:41:40	37
2020/11/19 0:41:49	38
2020/11/19 0:42:00	39
2020/11/19 0:42:30	40
2020/11/19 0:43:10	41
2020/11/19 0:43:33	42
2020/11/19 0:43:59	43
2020/11/19 0:45:13	44
2020/11/19 0:45:30	45
2020/11/19 0:45:33	46
2020/11/19 0:46:25	47
2020/11/19 0:46:30	48
2020/11/19 0:49:15	49
2020/11/19 0:53:03	50
2020/11/19 0:53:13	51
2020/11/19 0:53:18	52
2020/11/19 0:53:26	53
2020/11/19 0:53:38	54
2020/11/19 0:54:17	55
2020/11/19 0:54:34	56
2020/11/19 0:54:39	57
2020/11/19 0:57:58	58
2020/11/19 1:00:53	59
2020/11/19 1:01:44	60
2020/11/19 1:02:04	61
2020/11/19 1:04:08	62
2020/11/19 1:04:15	63
2020/11/19 1:04:16	64
2020/11/19 1:04:21	65
2020/11/19 1:08:04	68
2020/11/19 1:10:16	64
2020/11/19 1:10:26	63
2020/11/19 1:24:13	66
2020/11/19 1:24:15	67
2020/11/19 1:25:03	68
2020/11/19 1:25:05	69
2020/11/19 1:25:08	70
2020/11/19 1:27:16	71
2020/11/19 1:27:19	72
2020/11/19 1:27:22	73
2020/11/19 1:27:31	74
2020/11/19 1:27:42	75
2020/11/19 1:27:49	76
2020/11/19 1:28:08	77
2020/11/19 1:28:12	78
2020/11/19 1:28:41	79
2020/11/19 1:28:52	80
2020/11/19 1:29:03	81
2020/11/19 1:29:16	82
2020/11/19 1:29:28	83
2020/11/19 1:29:36	84
2020/11/19 1:29:46	85
2020/11/19 1:29:56	86
2020/11/19 1:30:06	87
2020/11/19 1:30:15	88
2020/11/19 1:30:28	89
2020/11/19 1:30:36	90
2020/11/19 1:30:40	91
2020/11/19 1:30:47	92
2020/11/19 1:32:52	93
2020/11/19 1:33:32	94
2020/11/19 1:34:22	95
2020/11/19 1:34:56	96
2020/11/19 1:34:59	97
2020/11/19 1:35:14	95
2020/11/19 1:35:15	94
2020/11/19 1:36:22	96
2020/11/19 1:36:23	98
2020/11/19 1:36:28	99
2020/11/19 1:37:20	100
2020/11/19 1:39:05	101
2020/11/19 1:39:10	102
2020/11/19 1:39:18	103
2020/11/19 1:39:34	104
2020/11/19 1:39:39	105
2020/11/19 1:39:51	106
2020/11/19 1:40:25	107
2020/11/19 1:40:42	108
2020/11/19 1:41:14	109
2020/11/19 1:41:53	110
2020/11/19 1:41:56	111
2020/11/19 1:43:13	112
2020/11/19 1:43:29	113
2020/11/19 1:43:50	114
2020/11/19 1:43:59	115
2020/11/19 1:45:33	116
2020/11/19 1:45:37	117
2020/11/19 1:46:10	118
2020/11/19 1:46:37	119
2020/11/19 1:47:33	120
2020/11/19 1:48:07	121
2020/11/19 1:48:35	122
2020/11/19 1:48:41	123
2020/11/19 1:53:41	120
2020/11/19 1:53:53	119
2020/11/19 1:54:04	118
2020/11/19 1:54:27	117
2020/11/19 1:54:33	116
2020/11/19 1:54:42	115
2020/11/19 1:54:53	114
2020/11/19 1:55:10	113
2020/11/19 1:55:12	112
2020/11/19 1:55:27	111
2020/11/19 1:55:39	110
2020/11/19 1:56:16	109
2020/11/19 1:57:54	112
2020/11/19 1:57:56	113
2020/11/19 1:58:42	114
2020/11/19 1:58:51	115
2020/11/19 1:59:24	116
2020/11/19 2:01:12	117
2020/11/19 2:02:00	118
2020/11/19 2:02:32	119
2020/11/19 2:02:43	120
2020/11/19 2:03:12	121
2020/11/19 2:03:25	122
2020/11/19 2:03:29	123
2020/11/19 2:07:46	121
2020/11/19 2:07:47	120
2020/11/19 2:08:34	119
2020/11/19 2:08:51	118
2020/11/19 2:09:01	117
2020/11/19 2:09:09	116
2020/11/19 2:09:19	115
2020/11/19 2:09:32	114
2020/11/19 2:09:49	113
2020/11/19 2:09:55	112
2020/11/19 2:10:06	111
2020/11/19 2:10:14	112
2020/11/19 2:10:51	108
2020/11/19 2:10:53	107
2020/11/19 2:10:59	106
2020/11/19 2:11:16	105
2020/11/19 2:11:41	104
2020/11/19 2:11:48	103
2020/11/19 2:11:54	102
2020/11/19 2:11:58	101
2020/11/19 2:12:14	100
2020/11/19 2:12:25	99
2020/11/19 2:12:43	98
2020/11/19 2:13:17	97
2020/11/19 2:13:45	96
2020/11/19 2:15:09	95
2020/11/19 2:15:15	94
2020/11/19 2:15:18	93
2020/11/19 2:15:28	92
2020/11/19 2:15:45	91
2020/11/19 2:15:51	90
2020/11/19 2:16:13	89
2020/11/19 2:16:24	88
2020/11/19 2:16:30	87
2020/11/19 2:16:39	86
2020/11/19 2:18:23	85
2020/11/19 2:18:48	84
2020/11/19 2:19:16	82
2020/11/19 2:20:19	81
2020/11/19 2:20:50	80
2020/11/19 2:20:59	79
2020/11/19 2:22:22	78
2020/11/19 2:22:26	77
2020/11/19 2:22:44	76
2020/11/19 2:22:48	75
2020/11/19 2:23:09	73
2020/11/19 2:23:12	72
2020/11/19 2:23:49	70
2020/11/19 2:24:01	69
2020/11/19 2:24:34	68
2020/11/19 2:24:36	67
2020/11/19 2:24:40	66
2020/11/19 2:25:05	65
2020/11/19 2:25:13	64
2020/11/19 2:25:15	63
2020/11/19 2:26:29	62
2020/11/19 2:27:11	61
2020/11/19 2:27:13	60
2020/11/19 2:27:23	59
2020/11/19 2:27:47	57
2020/11/19 2:28:00	56
2020/11/19 2:28:20	55
2020/11/19 2:28:43	54
2020/11/19 2:28:54	53
2020/11/19 2:29:30	52
2020/11/19 2:29:37	51
2020/11/19 2:29:38	50
2020/11/19 2:29:51	49
2020/11/19 2:31:29	48
2020/11/19 2:31:37	47
2020/11/19 2:32:07	46
2020/11/19 2:32:53	44
2020/11/19 2:32:54	43
2020/11/19 2:33:07	42
2020/11/19 2:33:41	41
2020/11/19 2:33:52	40
2020/11/19 2:34:07	39
2020/11/19 2:34:17	38
2020/11/19 2:34:26	37
2020/11/19 2:34:38	36
2020/11/19 2:34:52	35
2020/11/19 2:34:59	34
2020/11/19 2:35:18	33
2020/11/19 2:35:28	32
2020/11/19 2:36:00	31
2020/11/19 2:36:08	30
2020/11/19 2:36:16	29
2020/11/19 2:36:31	28
2020/11/19 2:36:58	27
2020/11/19 2:37:45	26
2020/11/19 2:37:48	25
2020/11/19 2:38:08	24
2020/11/19 2:38:35	23
2020/11/19 2:39:07	21
2020/11/19 2:39:14	20
2020/11/19 2:39:46	19
2020/11/19 2:39:50	18
2020/11/19 2:40:08	17
2020/11/19 2:40:24	16
2020/11/19 2:40:38	15
2020/11/19 2:40:56	14
2020/11/19 2:41:31	12
2020/11/19 2:41:41	11
2020/11/19 2:43:06	10
2020/11/19 2:43:50	9
2020/11/19 2:44:01	8
2020/11/19 2:50:45	11
2020/11/19 2:50:48	12
2020/11/19 2:51:06	9
2020/11/19 2:52:08	8
2020/11/19 2:58:11	10
2020/11/19 2:58:12	11
2020/11/19 2:58:25	12
2020/11/19 2:59:06	13
2020/11/19 2:59:08	14
2020/11/19 2:59:11	15
2020/11/19 2:59:36	16
2020/11/19 2:59:44	17
2020/11/19 2:59:55	18
2020/11/19 3:00:12	19
2020/11/19 3:00:25	20
2020/11/19 3:00:29	21
2020/11/19 3:01:09	22
2020/11/19 3:01:12	23
2020/11/19 3:01:15	24
2020/11/19 3:01:59	22
2020/11/19 3:02:00	21
2020/11/19 3:02:12	20
2020/11/19 3:02:37	19
2020/11/19 3:02:41	18
2020/11/19 3:02:54	17
2020/11/19 3:02:59	16
2020/11/19 3:03:08	15
2020/11/19 3:03:52	14
2020/11/19 3:04:12	13
2020/11/19 3:05:09	12
2020/11/19 3:05:21	11
2020/11/19 3:05:51	10
2020/11/19 3:06:02	9
2020/11/19 3:06:14	8
2020/11/19 3:07:02	11
2020/11/19 3:07:18	8
2020/11/19 3:08:50	9
2020/11/19 3:08:51	11
2020/11/19 3:09:00	12
2020/11/19 3:09:23	13
2020/11/19 3:09:26	14
2020/11/19 3:09:28	15
2020/11/19 3:09:51	16
2020/11/19 3:10:04	17
2020/11/19 3:10:09	18
2020/11/19 3:10:25	19
2020/11/19 3:10:41	20
2020/11/19 3:10:45	21
2020/11/19 3:11:11	22
2020/11/19 3:11:14	23
2020/11/19 3:11:17	24
2020/11/19 3:11:37	25
2020/11/19 3:11:49	26
2020/11/19 3:11:57	27
2020/11/19 3:12:05	28
2020/11/19 3:12:17	29
2020/11/19 3:12:37	30
2020/11/19 3:12:46	31
2020/11/19 3:12:52	32
2020/11/19 3:13:07	33
2020/11/19 3:13:22	34
2020/11/19 3:13:27	35
2020/11/19 3:13:49	36
2020/11/19 3:13:55	37
2020/11/19 3:14:09	38
2020/11/19 3:14:18	39
2020/11/19 3:14:24	40
2020/11/19 3:14:43	41
2020/11/19 3:14:51	42
2020/11/19 3:15:00	43
2020/11/19 3:15:25	44
2020/11/19 3:15:30	45
2020/11/19 3:15:32	46
2020/11/19 3:15:56	47
2020/11/19 3:16:21	48
2020/11/19 3:17:01	49
2020/11/19 3:17:29	50
2020/11/19 3:17:42	51
2020/11/19 3:17:44	52
2020/11/19 3:17:47	53
2020/11/19 3:17:52	54
2020/11/19 3:18:22	55
2020/11/19 3:19:53	56
2020/11/19 3:20:04	57
2020/11/19 3:20:11	58
2020/11/19 3:20:25	59
2020/11/19 3:20:28	60
2020/11/19 3:20:48	61
2020/11/19 3:20:50	62
2020/11/19 3:21:09	63
2020/11/19 3:21:23	64
2020/11/19 3:21:44	65
2020/11/19 3:21:48	66
2020/11/19 3:22:22	67
2020/11/19 3:22:25	68
2020/11/19 3:22:27	69
2020/11/19 3:22:53	70
2020/11/19 3:23:07	71
2020/11/19 3:23:11	72
2020/11/19 3:23:31	73
2020/11/19 3:23:37	74
2020/11/19 3:23:47	75
2020/11/19 3:23:51	76
2020/11/19 3:24:08	77
2020/11/19 3:24:12	78
2020/11/19 3:24:41	79
2020/11/19 3:24:54	80
2020/11/19 3:25:03	81
2020/11/19 3:25:18	82
2020/11/19 3:25:44	83
2020/11/19 3:27:04	84
2020/11/19 3:27:21	85
2020/11/19 3:28:35	86
2020/11/19 3:28:48	87
2020/11/19 3:29:11	88
2020/11/19 3:29:39	89
2020/11/19 3:29:44	90
2020/11/19 3:29:55	91
2020/11/19 3:30:23	92
2020/11/19 3:30:26	93
2020/11/19 3:30:43	94
2020/11/19 3:30:58	95
2020/11/19 3:31:13	96
2020/11/19 3:31:15	97
2020/11/19 3:32:03	98
2020/11/19 3:32:27	99
2020/11/19 3:32:40	100
2020/11/19 3:32:57	101
2020/11/19 3:33:08	102
2020/11/19 3:33:21	103
2020/11/19 3:33:43	104
2020/11/19 3:33:50	105
2020/11/19 3:35:18	106
2020/11/19 3:35:41	107
2020/11/19 3:35:54	108
2020/11/19 3:35:58	109
2020/11/19 3:36:02	110
2020/11/19 3:36:06	111
2020/11/19 3:38:16	112
2020/11/19 3:38:27	113
2020/11/19 3:38:37	114
2020/11/19 3:38:52	115
2020/11/19 3:39:14	116
2020/11/19 3:39:52	117
2020/11/19 3:40:33	118
2020/11/19 3:40:51	119
2020/11/19 3:40:54	120
2020/11/19 3:42:24	121
2020/11/19 3:42:36	122
2020/11/19 3:43:00	123
2020/11/19 3:47:19	120
2020/11/19 3:47:31	119
2020/11/19 3:47:44	118
2020/11/19 3:48:00	117
2020/11/19 3:48:07	116
2020/11/19 3:48:22	115
2020/11/19 3:48:28	114
2020/11/19 3:48:44	113
2020/11/19 3:48:49	112
2020/11/19 3:48:59	111
2020/11/19 3:49:12	110
2020/11/19 3:49:42	108
2020/11/19 3:49:48	107
2020/11/19 3:51:34	109
2020/11/19 3:56:29	112
2020/11/19 3:57:49	113
2020/11/19 3:58:04	114
2020/11/19 3:58:23	115
2020/11/19 3:58:51	116
2020/11/19 3:59:02	117
2020/11/19 3:59:35	118
2020/11/19 3:59:41	119
2020/11/19 4:00:27	120
2020/11/19 4:00:54	121
2020/11/19 4:03:24	122
2020/11/19 4:03:28	123
2020/11/19 4:07:33	120
2020/11/19 4:07:44	119
2020/11/19 4:07:53	118
2020/11/19 4:08:14	117
2020/11/19 4:08:19	116
2020/11/19 4:08:25	115
2020/11/19 4:08:44	114
2020/11/19 4:08:54	113
2020/11/19 4:09:03	112
2020/11/19 4:09:16	111
2020/11/19 4:09:24	110
2020/11/19 4:09:55	109
2020/11/19 4:09:59	108
2020/11/19 4:10:07	107
2020/11/19 4:10:16	106
2020/11/19 4:11:10	105
2020/11/19 4:11:16	104
2020/11/19 4:11:57	103
2020/11/19 4:12:03	102
2020/11/19 4:12:15	101
2020/11/19 4:12:43	100
2020/11/19 4:13:09	99
2020/11/19 4:13:25	98
2020/11/19 4:13:56	97
2020/11/19 4:14:13	96
2020/11/19 4:14:44	95
2020/11/19 4:15:07	94
2020/11/19 4:15:43	93
2020/11/19 4:15:49	92
2020/11/19 4:16:33	91
2020/11/19 4:16:37	90
2020/11/19 4:17:33	89
2020/11/19 4:17:58	88
2020/11/19 4:18:14	87
2020/11/19 4:18:25	86
2020/11/19 4:18:38	85
2020/11/19 4:19:03	84
2020/11/19 4:19:26	83
2020/11/19 4:19:45	82
2020/11/19 4:20:08	81
2020/11/19 4:20:34	80
2020/11/19 4:20:51	79
2020/11/19 4:21:19	78
2020/11/19 4:21:38	77
2020/11/19 4:22:21	76
2020/11/19 4:22:27	75
2020/11/19 4:22:57	74
2020/11/19 4:22:58	73
2020/11/19 4:23:01	72
2020/11/19 4:24:01	71
2020/11/19 4:24:10	70
2020/11/19 4:24:39	69
2020/11/19 4:25:10	68
2020/11/19 4:25:23	67
2020/11/19 4:25:28	66
2020/11/19 4:26:18	65
2020/11/19 4:26:36	64
2020/11/19 4:26:42	63
2020/11/19 4:27:26	62
2020/11/19 4:29:24	61
2020/11/19 4:29:28	60
2020/11/19 4:29:47	59
2020/11/19 4:30:12	57
2020/11/19 4:30:18	56
2020/11/19 4:31:08	55
2020/11/19 4:31:27	54
2020/11/19 4:31:47	53
2020/11/19 4:32:40	52
2020/11/19 4:32:45	51
2020/11/19 4:32:46	50
2020/11/19 4:34:26	49
2020/11/19 4:35:06	48
2020/11/19 4:35:21	47
2020/11/19 4:35:48	46
2020/11/19 4:36:13	45
2020/11/19 4:36:52	44
2020/11/19 4:37:05	43
2020/11/19 4:37:14	42
2020/11/19 4:38:01	41
2020/11/19 4:38:20	40
2020/11/19 4:38:30	39
2020/11/19 4:39:03	38
2020/11/19 4:39:30	37
2020/11/19 4:39:43	36
2020/11/19 4:40:04	35
2020/11/19 4:40:14	34
2020/11/19 4:40:50	33
2020/11/19 4:41:11	32
2020/11/19 4:41:58	31
2020/11/19 4:42:09	30
2020/11/19 4:42:24	29
2020/11/19 4:42:43	28
2020/11/19 4:43:46	27
2020/11/19 4:43:52	26
2020/11/19 4:44:02	25
2020/11/19 4:44:18	24
2020/11/19 4:44:40	23
2020/11/19 4:45:11	21
2020/11/19 4:45:17	20
2020/11/19 4:46:28	19
2020/11/19 4:46:38	18
2020/11/19 4:47:01	17
2020/11/19 4:47:25	16
2020/11/19 4:47:36	15
2020/11/19 4:47:56	14
2020/11/19 4:48:58	12
2020/11/19 4:49:14	11
2020/11/19 4:49:58	10
2020/11/19 4:51:10	8
2020/11/19 4:52:27	11
2020/11/19 4:52:35	8
2020/11/19 4:52:46	7
2020/11/19 4:54:17	11
2020/11/19 4:54:25	12
2020/11/19 4:54:47	13
2020/11/19 4:54:51	14
2020/11/19 4:55:04	15
2020/11/19 4:55:19	16
2020/11/19 4:55:58	17
2020/11/19 4:56:23	18
2020/11/19 4:56:42	19
2020/11/19 4:57:35	20
2020/11/19 4:58:22	21
2020/11/19 5:00:18	19
2020/11/19 5:00:19	18
2020/11/19 5:00:23	17
2020/11/19 5:01:08	16
2020/11/19 5:01:21	15
2020/11/19 5:01:50	14
2020/11/19 5:02:37	12
2020/11/19 5:03:05	11
2020/11/19 5:03:47	10
2020/11/19 5:04:09	9
2020/11/19 5:05:33	8
2020/11/19 5:06:00	7
2020/11/19 5:06:47	8
2020/11/19 5:06:48	10
2020/11/19 5:07:07	11
2020/11/19 5:07:27	12
2020/11/19 5:08:02	13
2020/11/19 5:08:06	14
2020/11/19 5:08:13	15
2020/11/19 5:08:32	16
2020/11/19 5:08:40	17
2020/11/19 5:08:53	18
2020/11/19 5:09:02	19
2020/11/19 5:09:18	20
2020/11/19 5:09:22	21
2020/11/19 5:09:52	22
2020/11/19 5:09:55	23
2020/11/19 5:09:59	24
2020/11/19 5:10:23	25
2020/11/19 5:10:54	26
2020/11/19 5:11:02	27
2020/11/19 5:11:55	28
2020/11/19 5:12:02	29
2020/11/19 5:33:18	30
2020/11/19 5:33:54	31
2020/11/19 5:33:57	32
2020/11/19 5:34:26	33
2020/11/19 5:35:01	34
2020/11/19 5:35:15	35
2020/11/19 5:35:44	36
2020/11/19 5:36:01	37
2020/11/19 5:36:25	38
2020/11/19 5:36:47	39
2020/11/19 5:37:00	40
2020/11/19 5:37:33	41
2020/11/19 5:37:47	42
2020/11/19 5:38:05	43
2020/11/19 5:38:48	44
2020/11/19 5:39:06	45
2020/11/19 5:39:10	46
2020/11/19 5:40:17	47
2020/11/19 5:40:22	48
2020/11/19 5:42:11	49
2020/11/19 5:42:27	50
2020/11/19 5:42:45	51
2020/11/19 5:42:50	52
2020/11/19 5:42:54	53
2020/11/19 5:42:59	54
2020/11/19 5:45:09	55
2020/11/19 5:45:21	56
2020/11/19 5:45:39	57
2020/11/19 5:45:55	58
2020/11/19 5:46:09	59
2020/11/19 5:46:19	60
2020/11/19 5:47:06	61
2020/11/19 5:47:11	62
2020/11/19 5:47:13	63
2020/11/19 5:47:18	64
2020/11/19 5:48:19	65
2020/11/19 5:48:24	66
2020/11/19 5:48:33	67
2020/11/19 5:49:12	68
2020/11/19 5:49:25	69
2020/11/19 5:49:29	70
2020/11/19 5:50:20	71
2020/11/19 5:50:27	72
2020/11/19 5:51:05	73
2020/11/19 5:51:13	74
2020/11/19 5:51:32	75
2020/11/19 5:51:35	76
2020/11/19 5:52:04	77
2020/11/19 5:52:16	78
2020/11/19 5:53:05	79
2020/11/19 5:53:28	80
2020/11/19 5:53:38	81
2020/11/19 5:54:05	82
2020/11/19 5:54:25	83
2020/11/19 5:54:48	84
2020/11/19 5:55:05	85
2020/11/19 5:55:17	86
2020/11/19 5:55:55	88
2020/11/19 5:56:06	89
2020/11/19 5:56:33	90
2020/11/19 5:56:43	91
2020/11/19 5:57:13	92
2020/11/19 5:57:27	93
2020/11/19 5:58:22	94
2020/11/19 5:58:36	95
2020/11/19 5:59:31	96
2020/11/19 6:00:20	97
2020/11/19 6:00:29	98
2020/11/19 6:00:57	99
2020/11/19 6:01:23	100
2020/11/19 6:01:44	101
2020/11/19 6:02:02	102
2020/11/19 6:02:19	103
2020/11/19 6:02:31	104
2020/11/19 6:02:53	105
2020/11/19 6:03:37	106
2020/11/19 6:04:05	107
2020/11/19 6:13:51	108
2020/11/19 6:14:04	109
2020/11/19 6:14:16	110
2020/11/19 6:14:20	111
2020/11/19 6:15:45	112
2020/11/19 6:15:50	113
2020/11/19 6:16:02	114
2020/11/19 6:16:21	115
2020/11/19 6:17:29	116
2020/11/19 6:17:48	117
2020/11/19 6:18:00	118
2020/11/19 6:18:06	119
2020/11/19 6:18:52	120
2020/11/19 6:19:26	121
2020/11/19 6:19:34	122
2020/11/19 6:21:09	123
2020/11/19 6:24:39	121
2020/11/19 6:24:40	120
2020/11/19 6:25:00	119
2020/11/19 6:25:08	118
2020/11/19 6:25:31	117
2020/11/19 6:25:41	116
2020/11/19 6:25:54	115
2020/11/19 6:26:04	114
2020/11/19 6:26:06	113
2020/11/19 6:26:29	112
2020/11/19 6:26:44	111
2020/11/19 6:29:44	114
2020/11/19 6:29:52	115
2020/11/19 6:30:04	116
2020/11/19 6:30:15	117
2020/11/19 6:30:37	118
2020/11/19 6:30:48	119
2020/11/19 6:31:16	120
2020/11/19 6:31:38	121
2020/11/19 6:31:58	122
2020/11/19 6:32:33	123
2020/11/19 6:35:54	120
2020/11/19 6:36:12	119
2020/11/19 6:36:22	118
2020/11/19 6:36:46	117
2020/11/19 6:36:48	116
2020/11/19 6:36:58	115
2020/11/19 6:37:10	114
2020/11/19 6:37:24	113
2020/11/19 6:37:30	112
2020/11/19 6:37:43	111
2020/11/19 6:37:55	110
2020/11/19 6:40:01	109
2020/11/19 6:40:34	107
2020/11/19 6:40:43	106
2020/11/19 6:41:10	105
2020/11/19 6:41:31	104
2020/11/19 6:42:01	102
2020/11/19 6:42:39	101
2020/11/19 6:42:44	100
2020/11/19 6:43:49	99
2020/11/19 6:43:50	98
2020/11/19 6:44:07	97
2020/11/19 6:45:58	96
2020/11/19 6:46:19	95
2020/11/19 6:46:48	94
2020/11/19 6:47:04	93
2020/11/19 6:47:09	92
2020/11/19 6:48:45	93
2020/11/19 6:48:46	95
2020/11/19 6:48:59	96
2020/11/19 6:49:09	97
2020/11/19 6:49:38	98
2020/11/19 6:49:48	99
2020/11/19 6:50:01	100
2020/11/19 6:50:42	101
2020/11/19 6:50:55	102
2020/11/19 6:51:06	103
2020/11/19 6:51:16	104
2020/11/19 6:51:31	105
2020/11/19 6:52:09	106
2020/11/19 6:53:26	107
2020/11/19 6:54:06	108
2020/11/19 6:54:12	109
2020/11/19 6:54:23	110
2020/11/19 6:54:27	111
2020/11/19 6:55:29	112
2020/11/19 6:56:51	113
2020/11/19 6:58:01	114
2020/11/19 6:58:33	115
2020/11/19 6:58:52	116
2020/11/19 6:59:31	117
2020/11/19 6:59:36	118
2020/11/19 7:00:02	119
2020/11/19 7:02:15	120
2020/11/19 7:02:23	121
2020/11/19 7:03:22	122
2020/11/19 7:03:30	123
2020/11/19 7:07:21	120
2020/11/19 7:07:36	119
2020/11/19 7:07:40	118
2020/11/19 7:09:38	117
2020/11/19 7:09:53	116
2020/11/19 7:10:04	115
2020/11/19 7:10:14	114
2020/11/19 7:10:26	113
2020/11/19 7:10:38	112
2020/11/19 7:10:45	111
2020/11/19 7:10:57	110
2020/11/19 7:11:30	109
2020/11/19 7:11:32	107
2020/11/19 7:11:41	106
2020/11/19 7:11:59	105
2020/11/19 7:12:23	104
2020/11/19 7:12:29	103
2020/11/19 7:12:37	102
2020/11/19 7:12:47	101
2020/11/19 7:13:04	100
2020/11/19 7:13:31	99
2020/11/19 7:13:51	98
2020/11/19 7:14:10	97
2020/11/19 7:14:31	96
2020/11/19 7:14:52	95
2020/11/19 7:15:24	94
2020/11/19 7:15:43	93
2020/11/19 7:15:49	92
2020/11/19 7:16:09	91
2020/11/19 7:16:24	90
2020/11/19 7:16:53	89
2020/11/19 7:17:04	88
2020/11/19 7:17:19	87
2020/11/19 7:18:25	86
2020/11/19 7:18:39	85
2020/11/19 7:18:55	84
2020/11/19 7:19:10	83
2020/11/19 7:19:30	82
2020/11/19 7:19:48	81
2020/11/19 7:20:07	80
2020/11/19 7:20:24	79
2020/11/19 7:20:32	78
2020/11/19 7:21:00	77
2020/11/19 7:22:04	76
2020/11/19 7:22:09	75
2020/11/19 7:22:53	73
2020/11/19 7:22:55	72
2020/11/19 7:25:32	71
2020/11/19 7:25:33	70
2020/11/19 7:26:11	69
2020/11/19 7:26:33	68
2020/11/19 7:26:39	67
2020/11/19 7:26:42	66
2020/11/19 7:27:33	65
2020/11/19 7:27:46	64
2020/11/19 7:27:50	63
2020/11/19 7:28:35	62
2020/11/19 7:29:15	61
2020/11/19 7:29:19	60
2020/11/19 7:29:37	59
2020/11/19 7:30:05	57
2020/11/19 7:30:13	56
2020/11/19 7:30:54	55
2020/11/19 7:31:11	54
2020/11/19 7:31:31	53
2020/11/19 7:32:05	52
2020/11/19 7:32:31	50
2020/11/19 7:32:35	49
2020/11/19 7:33:28	47
2020/11/19 7:34:11	46
2020/11/19 7:34:28	45
2020/11/19 7:34:58	44
2020/11/19 7:35:18	43
2020/11/19 7:35:24	42
2020/11/19 7:36:06	41
2020/11/19 7:36:52	40
2020/11/19 7:37:07	39
2020/11/19 7:37:37	38
2020/11/19 7:38:01	37
2020/11/19 7:38:44	35
2020/11/19 7:39:03	34
2020/11/19 7:40:21	33
2020/11/19 7:40:39	32
2020/11/19 7:41:15	31
2020/11/19 7:41:30	30
2020/11/19 7:41:39	29
2020/11/19 7:41:58	28
2020/11/19 7:42:38	27
2020/11/19 7:42:54	26
2020/11/19 7:43:06	25
2020/11/19 7:43:16	24
2020/11/19 7:43:30	23
2020/11/19 7:43:48	22
2020/11/19 7:43:50	21
2020/11/19 7:44:03	20
2020/11/19 7:45:05	19
2020/11/19 7:45:13	18
2020/11/19 7:45:40	17
2020/11/19 7:45:52	16
2020/11/19 7:46:05	15
2020/11/19 7:46:26	14
2020/11/19 7:47:33	12
2020/11/19 7:47:49	11
2020/11/19 7:48:38	10
2020/11/19 7:49:47	8
2020/11/19 7:49:55	7
2020/11/19 7:50:29	8
2020/11/19 7:50:30	10
2020/11/19 7:50:31	11
2020/11/19 7:50:46	8
2020/11/19 7:50:48	7
2020/11/19 7:52:34	9
2020/11/19 7:52:35	11
2020/11/19 7:52:42	12
2020/11/19 7:53:07	13
2020/11/19 7:53:09	14
2020/11/19 7:53:11	15
2020/11/19 7:53:34	16
2020/11/19 7:53:43	17
2020/11/19 7:53:53	18
2020/11/19 7:55:26	19
2020/11/19 7:55:39	20
2020/11/19 7:55:54	21
2020/11/19 7:58:23	20
2020/11/19 8:00:10	19
2020/11/19 8:00:44	17
2020/11/19 8:01:04	16
2020/11/19 8:01:10	15
2020/11/19 8:01:41	14
2020/11/19 8:01:56	13
2020/11/19 8:02:38	12
2020/11/19 8:03:02	11
2020/11/19 8:03:40	10
2020/11/19 8:04:18	8
2020/11/19 8:04:36	9
2020/11/19 8:04:37	11
2020/11/19 8:04:41	12
2020/11/19 8:05:51	9
2020/11/19 8:05:57	8
2020/11/19 8:06:06	7
2020/11/19 8:07:03	10
2020/11/19 8:07:04	11
2020/11/19 8:07:17	12
2020/11/19 8:07:42	13
2020/11/19 8:07:45	14
2020/11/19 8:07:47	15
2020/11/19 8:08:10	16
2020/11/19 8:08:20	17
2020/11/19 8:08:24	18
2020/11/19 8:08:42	19
2020/11/19 8:08:55	20
2020/11/19 8:09:21	21
2020/11/19 8:09:35	22
2020/11/19 8:09:37	23
2020/11/19 8:09:43	24
2020/11/19 8:09:53	25
2020/11/19 8:10:14	26
2020/11/19 8:10:18	27
2020/11/19 8:10:23	28
2020/11/19 8:10:36	29
2020/11/19 8:10:50	30
2020/11/19 8:11:09	31
2020/11/19 8:11:12	32
2020/11/19 8:11:24	33
2020/11/19 8:11:40	34
2020/11/19 8:12:01	35
2020/11/19 8:12:12	36
2020/11/19 8:12:17	37
2020/11/19 8:12:26	38
2020/11/19 8:12:38	39
2020/11/19 8:12:46	40
2020/11/19 8:15:44	41
2020/11/19 8:15:53	42
2020/11/19 8:15:57	43
2020/11/19 8:16:39	45
2020/11/19 8:16:42	46
2020/11/19 8:16:44	47
2020/11/19 8:17:45	48
2020/11/19 8:17:47	49
2020/11/19 8:17:55	50
2020/11/19 8:18:15	51
2020/11/19 8:18:16	52
2020/11/19 8:18:20	53
2020/11/19 8:18:25	54
2020/11/19 8:18:58	55
2020/11/19 8:19:08	56
2020/11/19 8:20:27	57
2020/11/19 8:21:39	58
2020/11/19 8:21:41	59
2020/11/19 8:21:44	60
2020/11/19 8:29:54	61
2020/11/19 8:29:57	62
2020/11/19 8:30:17	63
2020/11/19 8:30:36	64
2020/11/19 8:31:24	65
2020/11/19 8:31:28	66
2020/11/19 8:32:09	67
2020/11/19 8:34:27	68
2020/11/19 8:34:36	69
2020/11/19 8:34:41	70
2020/11/19 8:35:43	71
2020/11/19 8:35:52	72
2020/11/19 8:36:30	73
2020/11/19 8:36:41	74
2020/11/19 8:36:42	75
2020/11/19 8:36:46	76
2020/11/19 8:37:09	77
2020/11/19 8:37:15	78
2020/11/19 8:39:20	79
2020/11/19 8:39:37	80
2020/11/19 8:39:55	81
2020/11/19 8:40:05	82
2020/11/19 8:40:24	83
2020/11/19 8:40:36	84
2020/11/19 8:40:45	85
2020/11/19 8:40:59	86
2020/11/19 8:41:10	87
2020/11/19 8:41:20	88
2020/11/19 8:41:34	89
2020/11/19 8:41:45	90
2020/11/19 8:41:51	91
2020/11/19 8:42:10	92
2020/11/19 8:42:23	93
2020/11/19 8:42:41	94
2020/11/19 8:42:49	95
2020/11/19 8:43:03	96
2020/11/19 8:43:17	97
2020/11/19 8:43:42	98
2020/11/19 8:43:53	99
2020/11/19 8:44:01	100
2020/11/19 8:50:21	101
2020/11/19 8:50:31	102
2020/11/19 8:50:35	103
2020/11/19 8:50:42	104
2020/11/19 8:50:51	105
2020/11/19 8:51:03	106
2020/11/19 8:51:33	107
2020/11/19 8:51:46	108
2020/11/19 8:51:48	109
2020/11/19 8:51:51	110
2020/11/19 8:51:58	111
2020/11/19 8:52:27	112
2020/11/19 8:53:48	113
2020/11/19 8:54:08	114
2020/11/19 8:54:17	115
2020/11/19 8:55:21	116
2020/11/19 8:55:52	117
2020/11/19 8:55:55	118
2020/11/19 8:56:01	119
2020/11/19 8:58:17	120
2020/11/19 9:01:45	121
2020/11/19 9:02:13	122
2020/11/19 9:02:19	123
2020/11/19 9:06:44	120
2020/11/19 9:06:57	119
2020/11/19 9:07:06	118
2020/11/19 9:07:29	117
2020/11/19 9:07:31	116
2020/11/19 9:07:40	115
2020/11/19 9:07:58	114
2020/11/19 9:08:16	113
2020/11/19 9:08:19	112
2020/11/19 9:08:28	111
2020/11/19 9:08:41	110
2020/11/19 9:09:09	109
2020/11/19 9:09:12	108
2020/11/19 9:09:31	107
2020/11/19 9:09:47	106
2020/11/19 9:10:08	105
2020/11/19 9:10:26	104
2020/11/19 9:10:39	103
2020/11/19 9:10:45	102
2020/11/19 9:10:54	101
2020/11/19 9:10:55	100
2020/11/19 9:14:42	99
2020/11/19 9:14:57	98
2020/11/19 9:15:19	97
2020/11/19 9:15:20	96
2020/11/19 9:16:03	95
2020/11/19 9:16:17	94
2020/11/19 9:16:25	93
2020/11/19 9:16:33	92
2020/11/19 9:16:49	91
2020/11/19 9:16:56	90
2020/11/19 9:17:15	89
2020/11/19 9:17:26	88
2020/11/19 9:17:31	87
2020/11/19 9:17:49	86
2020/11/19 9:17:55	85
2020/11/19 9:18:03	84
2020/11/19 9:18:12	83
2020/11/19 9:18:23	82
2020/11/19 9:19:00	80
2020/11/19 9:19:01	79
2020/11/19 9:20:22	78
2020/11/19 9:21:27	77
2020/11/19 9:21:55	76
2020/11/19 9:22:00	75
2020/11/19 9:22:29	73
2020/11/19 9:22:39	72
2020/11/19 9:23:08	71
2020/11/19 9:23:09	70
2020/11/19 9:23:11	69
2020/11/19 9:23:53	68
2020/11/19 9:23:56	67
2020/11/19 9:24:06	66
2020/11/19 9:24:33	64
2020/11/19 9:24:38	63
2020/11/19 9:25:12	62
2020/11/19 9:26:46	61
2020/11/19 9:26:58	60
2020/11/19 9:27:36	59
2020/11/19 9:27:47	58
2020/11/19 9:28:11	57
2020/11/19 9:28:18	56
2020/11/19 9:28:52	55
2020/11/19 9:29:18	54
2020/11/19 9:29:41	53
2020/11/19 9:30:14	52
2020/11/19 9:31:48	51
2020/11/19 9:32:14	50
2020/11/19 9:32:24	49
2020/11/19 9:37:09	48
2020/11/19 9:37:12	47
2020/11/19 9:39:27	46
2020/11/19 9:39:31	45
2020/11/19 9:40:11	44
2020/11/19 9:40:22	43
2020/11/19 9:40:27	42
2020/11/19 9:41:09	41
2020/11/19 9:41:20	40
2020/11/19 9:41:37	39
2020/11/19 9:42:52	38
2020/11/19 9:43:11	37
2020/11/19 9:43:27	36
2020/11/19 9:44:00	35
2020/11/19 9:47:05	34
2020/11/19 9:47:19	33
2020/11/19 9:47:31	32
2020/11/19 9:47:48	31
2020/11/19 9:48:09	30
2020/11/19 9:48:17	29
2020/11/19 9:48:27	28
2020/11/19 9:49:07	27
2020/11/19 9:49:25	26
2020/11/19 9:49:47	25
2020/11/19 9:50:56	24
2020/11/19 9:51:24	23
2020/11/19 9:51:57	21
2020/11/19 9:52:23	20
2020/11/19 9:53:19	19
2020/11/19 9:53:38	18
2020/11/19 9:54:18	17
2020/11/19 9:55:59	16
2020/11/19 9:56:20	15
2020/11/19 9:56:34	14
2020/11/19 9:58:15	13
2020/11/19 9:58:20	12
2020/11/19 9:58:40	11
2020/11/19 9:59:24	10
2020/11/19 10:00:04	9
2020/11/19 10:00:12	8
2020/11/19 10:01:03	10
2020/11/19 10:01:04	11
2020/11/19 10:02:15	8
2020/11/19 10:03:09	11
2020/11/19 10:03:26	12
2020/11/19 10:03:44	13
2020/11/19 10:03:46	14
2020/11/19 10:03:50	15
2020/11/19 10:04:15	16
2020/11/19 10:04:25	17
2020/11/19 10:04:33	18
2020/11/19 10:04:41	19
2020/11/19 10:04:59	20
2020/11/19 10:05:08	21
2020/11/19 10:05:33	22
2020/11/19 10:05:37	23
2020/11/19 10:06:14	24
2020/11/19 10:07:12	21
2020/11/19 10:07:30	20
2020/11/19 10:08:00	19
2020/11/19 10:08:49	18
2020/11/19 10:08:53	17
2020/11/19 10:12:59	16
2020/11/19 10:13:11	15
2020/11/19 10:13:27	14
2020/11/19 10:14:18	13
2020/11/19 10:14:38	12
2020/11/19 10:14:48	11
2020/11/19 10:15:40	10
2020/11/19 10:15:56	9
2020/11/19 10:16:15	8
2020/11/19 10:18:51	11
2020/11/19 10:19:04	12
2020/11/19 10:19:16	13
2020/11/19 10:19:23	14
2020/11/19 10:19:26	15
2020/11/19 10:19:56	16
2020/11/19 10:20:05	17
2020/11/19 10:20:09	18
2020/11/19 10:20:21	19
2020/11/19 10:20:37	20
2020/11/19 10:20:43	21
2020/11/19 10:21:10	22
2020/11/19 10:21:13	23
2020/11/19 10:21:16	24
2020/11/19 10:21:32	25
2020/11/19 10:21:50	26
2020/11/19 10:21:56	27
2020/11/19 10:22:00	28
2020/11/19 10:22:08	29
2020/11/19 10:22:34	30
2020/11/19 10:22:45	31
2020/11/19 10:22:52	32
2020/11/19 10:23:07	33
2020/11/19 10:23:20	34
2020/11/19 10:23:27	35
2020/11/19 10:23:48	36
2020/11/19 10:23:51	37
2020/11/19 10:24:07	38
2020/11/19 10:24:17	39
2020/11/19 10:24:25	40
2020/11/19 10:24:39	41
2020/11/19 10:24:51	42
2020/11/19 10:24:58	43
2020/11/19 10:25:29	44
2020/11/19 10:25:32	45
2020/11/19 10:25:34	46
2020/11/19 10:25:52	47
2020/11/19 10:25:56	48
2020/11/19 10:26:23	49
2020/11/19 10:26:39	50
2020/11/19 10:26:50	51
2020/11/19 10:26:54	52
2020/11/19 10:26:59	53
2020/11/19 10:27:24	54
2020/11/19 10:27:34	55
2020/11/19 10:27:46	56
2020/11/19 10:28:00	57
2020/11/19 10:28:16	58
2020/11/19 10:28:19	59
2020/11/19 10:28:23	60
2020/11/19 10:28:40	61
2020/11/19 10:28:45	62
2020/11/19 10:28:47	63
2020/11/19 10:28:51	64
2020/11/19 10:29:30	65
2020/11/19 10:29:31	66
2020/11/19 10:29:35	67
2020/11/19 10:30:07	68
2020/11/19 10:30:10	69
2020/11/19 10:30:14	70
2020/11/19 10:30:46	71
2020/11/19 10:30:51	72
2020/11/19 10:30:56	73
2020/11/19 10:36:19	74
2020/11/19 10:36:23	75
2020/11/19 10:36:27	76
2020/11/19 10:36:42	77
2020/11/19 10:36:47	78
2020/11/19 10:37:16	79
2020/11/19 10:37:24	80
2020/11/19 10:37:35	81
2020/11/19 10:37:58	82
2020/11/19 10:38:15	83
2020/11/19 10:38:35	84
2020/11/19 10:38:49	85
2020/11/19 10:39:55	86
2020/11/19 10:40:06	87
2020/11/19 10:40:15	88
2020/11/19 10:40:26	89
2020/11/19 10:41:27	90
2020/11/19 10:41:48	91
2020/11/19 10:42:35	92
2020/11/19 10:42:53	93
2020/11/19 10:43:12	94
2020/11/19 10:43:31	95
2020/11/19 10:43:32	96
2020/11/19 10:43:35	97
2020/11/19 10:43:38	98
2020/11/19 10:44:34	99
2020/11/19 10:44:45	100
2020/11/19 10:45:01	101
2020/11/19 10:45:12	102
2020/11/19 10:45:17	103
2020/11/19 10:45:25	104
2020/11/19 10:45:31	105
2020/11/19 10:45:47	106
2020/11/19 10:46:10	107
2020/11/19 10:46:16	108
2020/11/19 10:46:23	109
2020/11/19 10:46:33	110
2020/11/19 10:46:38	111
2020/11/19 10:47:05	112
2020/11/19 10:47:22	113
2020/11/19 10:47:28	114
2020/11/19 10:47:38	115
2020/11/19 10:47:55	116
2020/11/19 10:48:08	117
2020/11/19 10:48:22	118
2020/11/19 10:49:03	119
2020/11/19 10:49:48	120
2020/11/19 10:50:43	121
2020/11/19 10:50:50	122
2020/11/19 10:51:59	123
2020/11/19 10:55:21	120
2020/11/19 10:55:41	119
2020/11/19 10:55:44	118
2020/11/19 10:56:02	117
2020/11/19 10:56:11	116
2020/11/19 10:56:24	115
2020/11/19 10:56:34	114
2020/11/19 10:56:47	113
2020/11/19 10:56:50	112
2020/11/19 10:57:09	111
2020/11/19 10:57:16	110
2020/11/19 10:57:42	109
2020/11/19 10:57:48	108
2020/11/19 10:59:23	111
2020/11/19 10:59:33	112
2020/11/19 10:59:51	113
2020/11/19 11:00:03	114
2020/11/19 11:00:07	115
2020/11/19 11:00:26	116
2020/11/19 11:00:34	117
2020/11/19 11:03:33	118
2020/11/19 11:04:40	119
2020/11/19 11:04:57	120
2020/11/19 11:05:40	121
2020/11/19 11:07:05	122
2020/11/19 11:07:09	123
2020/11/19 11:10:52	120
2020/11/19 11:11:08	119
2020/11/19 11:11:35	118
2020/11/19 11:13:37	119
2020/11/19 11:13:38	121
2020/11/19 11:14:40	122
2020/11/19 11:14:44	123
2020/11/19 11:48:31	122
2020/11/19 12:43:42	123
2020/11/19 16:29:05	123
2020/11/19 16:46:21	121
2020/11/19 16:51:59	118
2020/11/19 16:52:04	117
2020/11/19 16:52:19	116
2020/11/19 16:52:36	115
2020/11/19 16:52:47	114
2020/11/19 16:52:59	113
2020/11/19 16:53:07	112
2020/11/19 16:53:24	111
2020/11/19 16:53:27	110
2020/11/19 16:54:05	109
2020/11/19 16:54:10	108
2020/11/19 16:54:25	107
2020/11/19 16:54:37	106
2020/11/19 16:55:14	105
2020/11/19 16:55:27	104
2020/11/19 16:55:49	102
2020/11/19 16:56:04	101
2020/11/19 16:56:26	100
2020/11/19 16:58:08	99
2020/11/19 16:58:41	98
2020/11/19 16:59:35	97
2020/11/19 16:59:49	96
2020/11/19 17:00:33	95
2020/11/19 17:00:35	94
2020/11/19 17:01:04	93
2020/11/19 17:01:09	92
2020/11/19 17:01:55	91
2020/11/19 17:02:11	90
2020/11/19 17:06:04	89
2020/11/19 17:07:03	88
2020/11/19 17:07:13	87
2020/11/19 17:07:44	85
2020/11/19 17:08:36	88
2020/11/19 17:08:40	89
2020/11/19 17:10:04	88
2020/11/19 17:10:05	86
2020/11/19 17:10:06	85
2020/11/19 17:10:25	84
2020/11/19 17:11:46	87
2020/11/19 17:11:47	88
2020/11/19 17:12:32	85
2020/11/19 17:12:33	84
2020/11/19 17:12:41	83
2020/11/19 17:12:59	82
2020/11/19 17:13:21	81
2020/11/19 17:13:54	80
2020/11/19 17:14:44	79
2020/11/19 17:15:04	78
2020/11/19 17:15:32	77
2020/11/19 17:16:00	76
2020/11/19 17:16:05	75
2020/11/19 17:16:25	73
2020/11/19 17:16:30	72
2020/11/19 17:17:03	71
2020/11/19 17:17:04	70
2020/11/19 17:17:18	69
2020/11/19 17:17:46	68
2020/11/19 17:17:49	67
2020/11/19 17:17:52	66
2020/11/19 17:18:12	65
2020/11/19 17:18:23	64
2020/11/19 17:18:25	63
2020/11/19 17:23:02	62
2020/11/19 17:23:08	61
2020/11/19 17:23:44	60
2020/11/19 17:23:56	59
2020/11/19 17:24:23	57
2020/11/19 17:24:37	56
2020/11/19 17:27:23	55
2020/11/19 17:27:52	53
2020/11/19 17:28:19	52
2020/11/19 17:28:25	51
2020/11/19 17:28:29	50
2020/11/19 17:28:31	49
2020/11/19 17:29:02	47
2020/11/19 17:29:32	46
2020/11/19 17:29:50	45
2020/11/19 17:30:03	44
2020/11/19 17:30:04	43
2020/11/19 17:30:13	42
2020/11/19 17:32:52	41
2020/11/19 17:33:04	40
2020/11/19 17:33:22	39
2020/11/19 17:33:32	38
2020/11/19 17:33:42	37
2020/11/19 17:33:49	36
2020/11/19 17:34:58	35
2020/11/19 17:35:09	34
2020/11/19 17:36:51	33
2020/11/19 17:36:58	32
2020/11/19 17:37:15	31
2020/11/19 17:37:27	30
2020/11/19 17:37:31	29
2020/11/19 17:37:54	28
2020/11/19 17:38:09	27
2020/11/19 17:38:27	26
2020/11/19 17:38:33	25
2020/11/19 17:38:49	24
2020/11/19 17:40:15	23
2020/11/19 17:40:51	21
2020/11/19 17:41:06	20
2020/11/19 17:41:49	19
2020/11/19 17:41:57	18
2020/11/19 17:42:17	17
2020/11/19 17:42:42	16
2020/11/19 17:42:50	15
2020/11/19 17:43:02	14
2020/11/19 17:43:33	13
2020/11/19 17:43:37	12
2020/11/19 17:43:45	11
2020/11/19 17:44:27	10
2020/11/19 17:44:58	9
2020/11/19 17:47:11	8
2020/11/19 17:47:45	7
2020/11/19 17:48:39	10
2020/11/19 17:48:41	11
2020/11/19 17:48:52	12
2020/11/19 17:49:11	13
2020/11/19 17:49:13	14
2020/11/19 17:49:17	15
2020/11/19 17:49:50	16
2020/11/19 17:49:57	17
2020/11/19 17:50:03	18
2020/11/19 17:50:15	19
2020/11/19 17:50:28	20
2020/11/19 17:50:32	21
2020/11/19 17:51:05	22
2020/11/19 17:51:07	23
2020/11/19 17:51:17	24
2020/11/19 17:51:31	25
2020/11/19 17:51:40	26
2020/11/19 17:53:42	25
2020/11/19 17:53:43	22
2020/11/19 17:53:47	21
2020/11/19 17:53:59	20
2020/11/19 17:54:40	19
2020/11/19 17:54:56	18
2020/11/19 17:55:23	17
2020/11/19 17:55:58	16
2020/11/19 17:56:21	15
2020/11/19 17:56:55	14
2020/11/19 17:58:00	13
2020/11/19 17:58:02	12
2020/11/19 17:58:25	11
2020/11/19 17:58:42	10
2020/11/19 17:59:04	9
2020/11/19 18:00:45	8
2020/11/19 18:02:17	11
2020/11/19 18:02:21	12
2020/11/19 18:02:37	13
2020/11/19 18:02:40	14
2020/11/19 18:02:46	15
2020/11/19 18:03:06	16
2020/11/19 18:03:18	17
2020/11/19 18:03:25	18
2020/11/19 18:03:37	19
2020/11/19 18:03:56	20
2020/11/19 18:03:59	21
2020/11/19 18:04:25	22
2020/11/19 18:04:28	23
2020/11/19 18:04:32	24
2020/11/19 18:04:48	25
2020/11/19 18:05:07	26
2020/11/19 18:05:14	27
2020/11/19 18:05:25	28
2020/11/19 18:05:43	29
2020/11/19 18:09:44	30
2020/11/19 18:10:30	31
2020/11/19 18:10:41	32
2020/11/19 18:10:50	33
2020/11/19 18:11:43	34
2020/11/19 18:15:12	35
2020/11/19 18:15:22	36
2020/11/19 18:17:26	37
2020/11/19 18:17:34	38
2020/11/19 18:17:50	39
2020/11/19 18:17:55	40
2020/11/19 18:19:55	41
2020/11/19 18:20:30	42
2020/11/19 18:20:33	43
2020/11/19 18:23:35	44
2020/11/19 18:25:32	45
2020/11/19 18:26:14	46
2020/11/19 18:27:59	47
2020/11/19 18:28:54	48
2020/11/19 18:28:58	49
2020/11/19 18:29:17	50
2020/11/19 18:30:56	51
2020/11/19 18:32:30	52
2020/11/19 18:32:36	53
2020/11/19 18:32:40	54
2020/11/19 18:33:24	55
2020/11/19 18:33:41	56
2020/11/19 18:33:59	57
2020/11/19 18:34:16	58
2020/11/19 18:34:19	59
2020/11/19 18:34:58	60
2020/11/19 18:35:11	61
2020/11/19 18:35:25	62
2020/11/19 18:35:42	63
2020/11/19 18:35:45	64
2020/11/19 18:36:29	65
2020/11/19 18:36:32	66
2020/11/19 18:38:52	67
2020/11/19 18:38:57	68
2020/11/19 18:39:02	69
2020/11/19 18:39:07	70
2020/11/19 18:43:02	71
2020/11/19 18:43:04	72
2020/11/19 18:43:52	73
2020/11/19 18:44:01	74
2020/11/19 18:44:11	75
2020/11/19 18:44:15	76
2020/11/19 18:44:38	77
2020/11/19 18:44:42	78
2020/11/19 18:45:17	79
2020/11/19 18:45:35	80
2020/11/19 18:45:46	81
2020/11/19 18:46:04	82
2020/11/19 18:46:27	83
2020/11/19 18:46:35	84
2020/11/19 18:46:48	85
2020/11/19 18:47:00	86
2020/11/19 18:47:07	87
2020/11/19 18:47:23	88
2020/11/19 18:47:41	89
2020/11/19 18:47:49	90
2020/11/19 18:47:54	91
2020/11/19 18:48:03	92
2020/11/19 18:49:32	93
2020/11/19 18:50:02	94
2020/11/19 18:50:14	95
2020/11/19 18:50:21	96
2020/11/19 18:50:23	97
2020/11/19 18:50:27	98
2020/11/19 18:52:04	99
2020/11/19 18:52:31	100
2020/11/19 18:52:46	101
2020/11/19 18:53:02	102
2020/11/19 18:53:10	103
2020/11/19 18:53:20	104
2020/11/19 18:53:33	105
2020/11/19 18:53:59	106
2020/11/19 18:54:15	107
2020/11/19 18:54:25	108
2020/11/19 18:54:30	109
2020/11/19 18:55:30	110
2020/11/19 18:57:40	112
2020/11/19 18:57:41	113
2020/11/19 18:57:44	114
2020/11/19 18:57:59	115
2020/11/19 18:59:03	116
2020/11/19 18:59:15	117
2020/11/19 18:59:25	118
2020/11/19 19:00:12	119
2020/11/19 19:01:33	120
2020/11/19 19:02:13	121
2020/11/19 19:02:39	122
2020/11/19 19:02:46	123
2020/11/19 19:06:53	120
2020/11/19 19:07:18	119
2020/11/19 19:07:24	118
2020/11/19 19:07:43	117
2020/11/19 19:07:53	116
2020/11/19 19:07:56	115
2020/11/19 19:09:10	114
2020/11/19 19:10:14	117
2020/11/19 19:10:38	118
2020/11/19 19:10:45	119
2020/11/19 19:10:52	120
2020/11/19 19:11:46	121
2020/11/19 19:12:30	122
2020/11/19 19:12:32	123
2020/11/19 19:12:46	122
2020/11/19 19:12:48	123
2020/11/19 19:16:56	119
2020/11/19 19:16:56	122
2020/11/19 19:17:09	118
2020/11/19 19:17:28	117
2020/11/19 19:17:43	116
2020/11/19 19:17:53	115
2020/11/19 19:18:06	114
2020/11/19 19:18:23	113
2020/11/19 19:18:30	112
2020/11/19 19:18:48	111
2020/11/19 19:19:13	110
2020/11/19 19:20:51	109
2020/11/19 19:21:45	108
2020/11/19 19:24:13	105
2020/11/19 19:24:14	104
2020/11/19 19:24:28	102
2020/11/19 19:24:44	101
2020/11/19 19:25:21	100
2020/11/19 19:25:43	99
2020/11/19 19:26:12	98
2020/11/19 19:28:54	97
2020/11/19 19:29:10	96
2020/11/19 19:29:51	95
2020/11/19 19:29:59	94
2020/11/19 19:30:23	93
2020/11/19 19:30:33	92
2020/11/19 19:30:51	91
2020/11/19 19:30:59	90
2020/11/19 19:31:18	89
2020/11/19 19:31:30	88
2020/11/19 19:31:38	87
2020/11/19 19:31:46	86
2020/11/19 19:31:59	85
2020/11/19 19:32:08	84
2020/11/19 19:32:18	83
2020/11/19 19:32:34	82
2020/11/19 19:32:45	81
2020/11/19 19:33:31	80
2020/11/19 19:33:33	79
2020/11/19 19:33:47	78
2020/11/19 19:34:00	77
2020/11/19 19:34:25	76
2020/11/19 19:34:29	75
2020/11/19 19:34:39	73
2020/11/19 19:34:44	72
2020/11/19 19:35:20	70
2020/11/19 19:35:35	69
2020/11/19 19:35:55	68
2020/11/19 19:36:00	67
2020/11/19 19:36:04	66
2020/11/19 19:36:24	65
2020/11/19 19:37:14	64
2020/11/19 19:37:25	63
2020/11/19 19:39:17	62
2020/11/19 19:41:54	61
2020/11/19 19:42:01	60
2020/11/19 19:42:05	57
2020/11/19 19:42:12	56
2020/11/19 19:44:45	54
2020/11/19 19:47:03	53
2020/11/19 19:47:37	52
2020/11/19 19:47:39	50
2020/11/19 19:47:41	49
2020/11/19 19:48:15	48
2020/11/19 19:48:33	47
2020/11/19 19:50:41	46
2020/11/19 19:51:06	45
2020/11/19 19:51:49	44
2020/11/19 19:51:51	43
2020/11/19 19:52:09	42
2020/11/19 19:52:32	41
2020/11/19 19:53:50	40
2020/11/19 19:54:14	39
2020/11/19 19:55:56	38
2020/11/19 19:55:59	37
2020/11/19 19:57:46	35
2020/11/19 19:57:52	34
2020/11/19 19:58:18	33
2020/11/19 19:58:24	32
2020/11/19 19:58:49	31
2020/11/19 19:58:51	30
2020/11/19 19:59:04	29
2020/11/19 19:59:28	28
2020/11/19 19:59:44	27
2020/11/19 19:59:51	26
2020/11/19 19:59:52	25
2020/11/19 20:00:05	24
2020/11/19 20:00:26	23
2020/11/19 20:00:44	22
2020/11/19 20:00:45	21
2020/11/19 20:00:56	20
2020/11/19 20:01:28	19
2020/11/19 20:01:33	18
2020/11/19 20:01:45	17
2020/11/19 20:02:09	16
2020/11/19 20:02:40	15
2020/11/19 20:03:07	14
2020/11/19 20:03:48	13
2020/11/19 20:03:53	12
2020/11/19 20:04:04	11
2020/11/19 20:04:36	10
2020/11/19 20:04:58	8
2020/11/19 20:04:58	9
2020/11/19 20:07:09	6
2020/11/19 20:07:32	9
2020/11/19 20:07:33	10
2020/11/19 20:07:49	11
2020/11/19 20:08:04	12
2020/11/19 20:08:31	13
2020/11/19 20:08:34	14
2020/11/19 20:08:37	15
2020/11/19 20:09:12	16
2020/11/19 20:09:25	17
2020/11/19 20:09:32	18
2020/11/19 20:09:51	19
2020/11/19 20:10:08	20
2020/11/19 20:10:15	21
2020/11/19 20:12:05	18
2020/11/19 20:12:07	17
2020/11/19 20:13:11	16
2020/11/19 20:13:29	15
2020/11/19 20:13:50	14
2020/11/19 20:14:19	12
2020/11/19 20:14:38	11
2020/11/19 20:15:11	10
2020/11/19 20:15:44	9
2020/11/19 20:17:19	8
2020/11/19 20:18:56	10
2020/11/19 20:18:57	12
2020/11/19 20:19:45	13
2020/11/19 20:20:05	14
2020/11/19 20:20:08	15
2020/11/19 20:20:43	16
2020/11/19 20:21:58	17
2020/11/19 20:22:01	18
2020/11/19 20:22:08	19
2020/11/19 20:22:21	20
2020/11/19 20:22:23	17
2020/11/19 20:24:08	18
2020/11/19 20:24:09	20
2020/11/19 20:24:17	21
2020/11/19 20:25:08	22
2020/11/19 20:26:18	23
2020/11/19 20:26:22	24
2020/11/19 20:27:36	25
2020/11/19 20:28:33	26
2020/11/19 20:29:16	27
2020/11/19 20:29:23	28
2020/11/19 20:29:30	29
2020/11/19 20:29:57	30
2020/11/19 20:30:08	31
2020/11/19 20:30:23	32
2020/11/19 20:30:28	33
2020/11/19 20:30:43	34
2020/11/19 20:30:56	35
2020/11/19 20:31:16	36
2020/11/19 20:31:21	37
2020/11/19 20:31:31	38
2020/11/19 20:31:36	39
2020/11/19 20:31:43	40
2020/11/19 20:32:06	41
2020/11/19 20:32:13	42
2020/11/19 20:32:19	43
2020/11/19 20:32:53	44
2020/11/19 20:32:57	45
2020/11/19 20:33:00	46
2020/11/19 20:33:15	47
2020/11/19 20:33:19	48
2020/11/19 20:33:48	49
2020/11/19 20:34:04	50
2020/11/19 20:34:20	51
2020/11/19 20:34:21	52
2020/11/19 20:34:23	53
2020/11/19 20:34:27	54
2020/11/19 20:34:59	55
2020/11/19 20:35:12	56
2020/11/19 20:35:19	57
2020/11/19 20:35:40	58
2020/11/19 20:35:43	59
2020/11/19 20:35:46	60
2020/11/19 20:36:05	61
2020/11/19 20:36:12	62
2020/11/19 20:36:16	63
2020/11/19 20:36:19	64
2020/11/19 20:36:58	65
2020/11/19 20:37:03	66
2020/11/19 20:37:08	67
2020/11/19 20:38:33	68
2020/11/19 20:38:34	69
2020/11/19 20:38:38	70
2020/11/19 20:41:50	71
2020/11/19 20:43:42	72
2020/11/19 20:43:49	73
2020/11/19 20:44:42	74
2020/11/19 20:45:57	75
2020/11/19 20:46:01	76
2020/11/19 20:48:58	77
2020/11/19 20:49:02	78
2020/11/19 20:50:44	79
2020/11/19 20:50:52	80
2020/11/19 20:51:48	81
2020/11/19 20:51:56	82
2020/11/19 20:52:02	83
2020/11/19 20:52:11	84
2020/11/19 20:52:22	85
2020/11/19 20:52:36	86
2020/11/19 20:52:49	87
2020/11/19 20:52:59	88
2020/11/19 20:53:09	89
2020/11/19 20:53:17	90
2020/11/19 20:53:25	91
2020/11/19 20:54:57	93
2020/11/19 20:55:52	94
2020/11/19 20:56:10	95
2020/11/19 20:56:49	96
2020/11/19 20:56:51	97
2020/11/19 20:57:23	98
2020/11/19 21:00:12	99
2020/11/19 21:00:42	100
2020/11/19 21:02:34	101
2020/11/19 21:04:04	102
2020/11/19 21:04:12	103
2020/11/19 21:04:39	104
2020/11/19 21:05:21	105
2020/11/19 21:07:00	106
2020/11/19 21:07:16	107
2020/11/19 21:07:38	110
2020/11/19 21:07:57	111
2020/11/19 21:08:23	112
2020/11/19 21:09:11	113
2020/11/19 21:10:23	114
2020/11/19 21:10:59	115
2020/11/19 21:12:32	116
2020/11/19 21:13:33	119
2020/11/19 21:13:43	120
2020/11/19 21:14:04	121
2020/11/19 21:14:53	122
2020/11/19 21:15:02	123
2020/11/19 21:19:34	120
2020/11/19 21:19:35	119
2020/11/19 21:19:37	118
2020/11/19 21:19:55	117
2020/11/19 21:19:59	116
2020/11/19 21:20:10	115
2020/11/19 21:20:28	114
2020/11/19 21:20:36	113
2020/11/19 21:20:38	112
2020/11/19 21:21:30	111
2020/11/19 21:22:09	113
2020/11/19 21:22:10	114
2020/11/19 21:22:18	115
2020/11/19 21:23:09	116
2020/11/19 21:23:52	117
2020/11/19 21:24:03	118
2020/11/19 21:24:13	119
2020/11/19 21:24:51	120
2020/11/19 21:25:21	121
2020/11/19 21:25:35	122
2020/11/19 21:25:41	123
2020/11/19 21:33:03	120
2020/11/19 21:33:17	119
2020/11/19 21:33:26	118
2020/11/19 21:33:43	117
2020/11/19 21:33:51	116
2020/11/19 21:33:58	115
2020/11/19 21:34:15	114
2020/11/19 21:34:31	113
2020/11/19 21:34:34	112
2020/11/19 21:34:48	111
2020/11/19 21:35:14	110
2020/11/19 21:35:40	109
2020/11/19 21:35:44	108
2020/11/19 21:35:56	107
2020/11/19 21:35:59	106
2020/11/19 21:36:17	105
2020/11/19 21:36:34	104
2020/11/19 21:36:48	103
2020/11/19 21:36:54	102
2020/11/19 21:37:00	101
2020/11/19 21:37:15	100
2020/11/19 21:37:27	99
2020/11/19 21:37:37	98
2020/11/19 21:37:51	97
2020/11/19 21:38:04	96
2020/11/19 21:38:20	95
2020/11/19 21:38:39	94
2020/11/19 21:38:44	93
2020/11/19 21:38:50	92
2020/11/19 21:39:12	91
2020/11/19 21:39:18	90
2020/11/19 21:39:35	89
2020/11/19 21:40:18	88
2020/11/19 21:42:28	87
2020/11/19 21:43:07	86
2020/11/19 21:43:43	85
2020/11/19 21:44:06	84
2020/11/19 21:44:25	83
2020/11/19 21:44:47	82
2020/11/19 21:45:01	81
2020/11/19 21:46:05	80
2020/11/19 21:47:22	79
2020/11/19 21:47:32	78
2020/11/19 21:47:44	77
2020/11/19 21:48:11	76
2020/11/19 21:48:15	75
2020/11/19 21:48:30	73
2020/11/19 21:48:34	72
2020/11/19 21:49:04	71
2020/11/19 21:49:06	70
2020/11/19 21:49:13	69
2020/11/19 21:49:45	68
2020/11/19 21:49:46	67
2020/11/19 21:50:09	66
2020/11/19 21:50:37	65
2020/11/19 21:50:52	64
2020/11/19 21:50:56	63
2020/11/19 21:51:37	62
2020/11/19 21:51:42	61
2020/11/19 21:51:44	60
2020/11/19 21:51:59	59
2020/11/19 21:52:17	58
2020/11/19 21:52:18	57
2020/11/19 21:52:25	56
2020/11/19 21:52:48	55
2020/11/19 21:52:54	54
2020/11/19 21:53:09	53
2020/11/19 21:53:35	52
2020/11/19 21:53:40	50
2020/11/19 21:53:45	49
2020/11/19 21:54:17	48
2020/11/19 21:54:18	47
2020/11/19 21:55:07	46
2020/11/19 21:55:10	45
2020/11/19 21:55:23	44
2020/11/19 21:55:36	43
2020/11/19 21:55:54	42
2020/11/19 21:56:05	41
2020/11/19 21:56:16	40
2020/11/19 21:56:31	39
2020/11/19 21:56:40	38
2020/11/19 21:56:53	37
2020/11/19 21:57:00	36
2020/11/19 21:57:09	35
2020/11/19 21:57:13	34
2020/11/19 21:57:49	33
2020/11/19 21:58:10	32
2020/11/19 21:58:24	31
2020/11/19 21:58:31	30
2020/11/19 21:58:39	29
2020/11/19 21:59:05	28
2020/11/19 21:59:32	27
2020/11/19 21:59:53	25
2020/11/19 22:00:21	24
2020/11/19 22:00:52	23
2020/11/19 22:02:06	21
2020/11/19 22:02:37	20
2020/11/19 22:03:39	19
2020/11/19 22:03:50	18
2020/11/19 22:04:24	17
2020/11/19 22:04:39	16
2020/11/19 22:04:50	15
2020/11/19 22:05:10	14
2020/11/19 22:06:12	12
2020/11/19 22:06:29	11
[truncated: 12,350 more rows]
